# Supplementary material for: Synthesis of pyrrolyldipyrrinato BF2 complexes by oxidative nucleophilic substitution of boron dipyrromethene with pyrrole
Source: Royal Society of Chemistry journal article supplement (doi:10.1039/c2ob06689k), 2011-12-20
Supplement: c2ob06689k.pdf [file c2ob06689k.pdf]

*Supporting information for*

# Synthesis of Pyrrolyldipyrrinato BF<sub>2</sub> Complexes by Oxidative Nucleophilic Substitution of Boron Dipyrromethene with Pyrrole

*Min Zhang, Erhong Hao\*, Jinyuan Zhou, Changjiang Yu, Guifeng Bai, Fengyun Wang and*

*Lijuan Jiao\**

Laboratory of Functional Molecular Solids, Ministry of Education; Anhui Laboratory of

Molecule-Based Materials; School of Chemistry and Materials Science, Anhui Normal

University, Wuhu, China 241000

Fax: (+) (+86) 553-388-3517

E-mail: [jiao421@mail.ahnu.edu.cn](mailto:jiao421@mail.ahnu.edu.cn), [haoehong@mail.ahnu.edu.cn](mailto:haoehong@mail.ahnu.edu.cn)

## Contents:

|                                                                                      |            |
|--------------------------------------------------------------------------------------|------------|
| <b>1. Figure S1 and Scheme S1-S3.....</b>                                            | <b>S2</b>  |
| <b>2. Copies of <sup>1</sup>H NMR, <sup>13</sup>C NMR for all new compounds.....</b> | <b>S4</b>  |
| <b>3. High resolution mass spectroscopies for all new compounds.....</b>             | <b>S24</b> |
| <b>4. UV-vis and Fluorescence spectroscopies for all the compounds.....</b>          | <b>S32</b> |
| <b>5. Table S1.....</b>                                                              | <b>S40</b> |
| <b>6. Experimental Fluorescence Decay Curve of BODIPYs 1a-h in DCM.....</b>          | <b>S42</b> |

### 1. Figure S1 and Scheme S1-S3

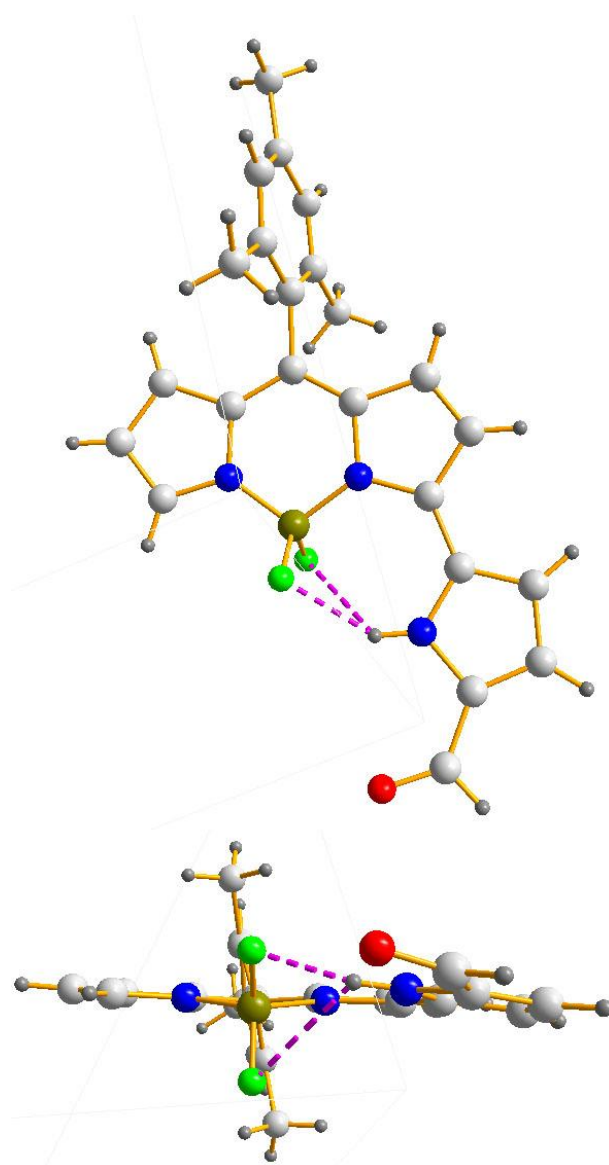

Figure S1. X-Ray structures of BODIPYs **6**. C grey, N blue, O red, B yellow, F bright-green.

Scheme S1. One-pot synthesis of BODIPY **2a**.

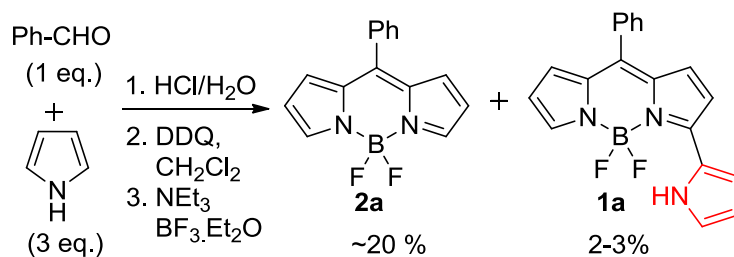

Scheme S2. Possible mechanism for formation of BODIPY **1** via oxidative nucleophilic substitution.

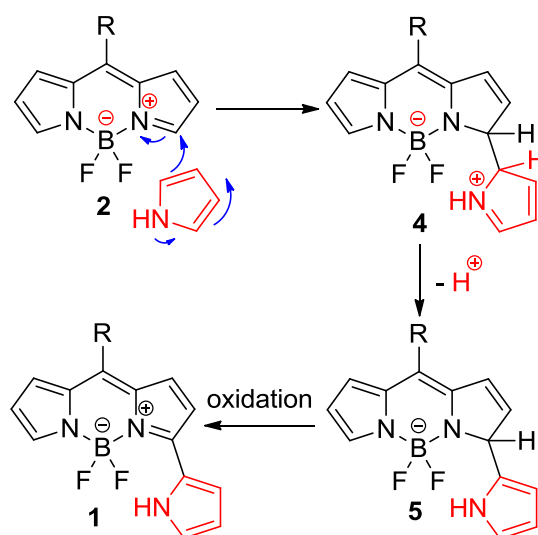

Scheme S3. Failed attempt to synthesize the double-substituted BODIPY **C**.

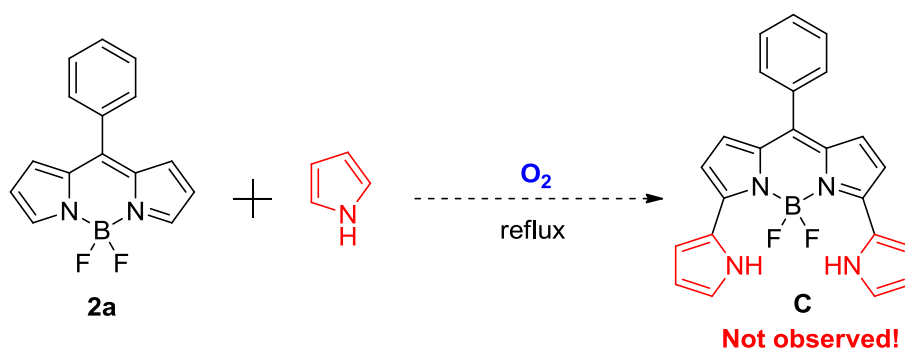

## 2. Copies of $^1\text{H}$ NMR, $^{13}\text{C}$ NMR for all new compounds

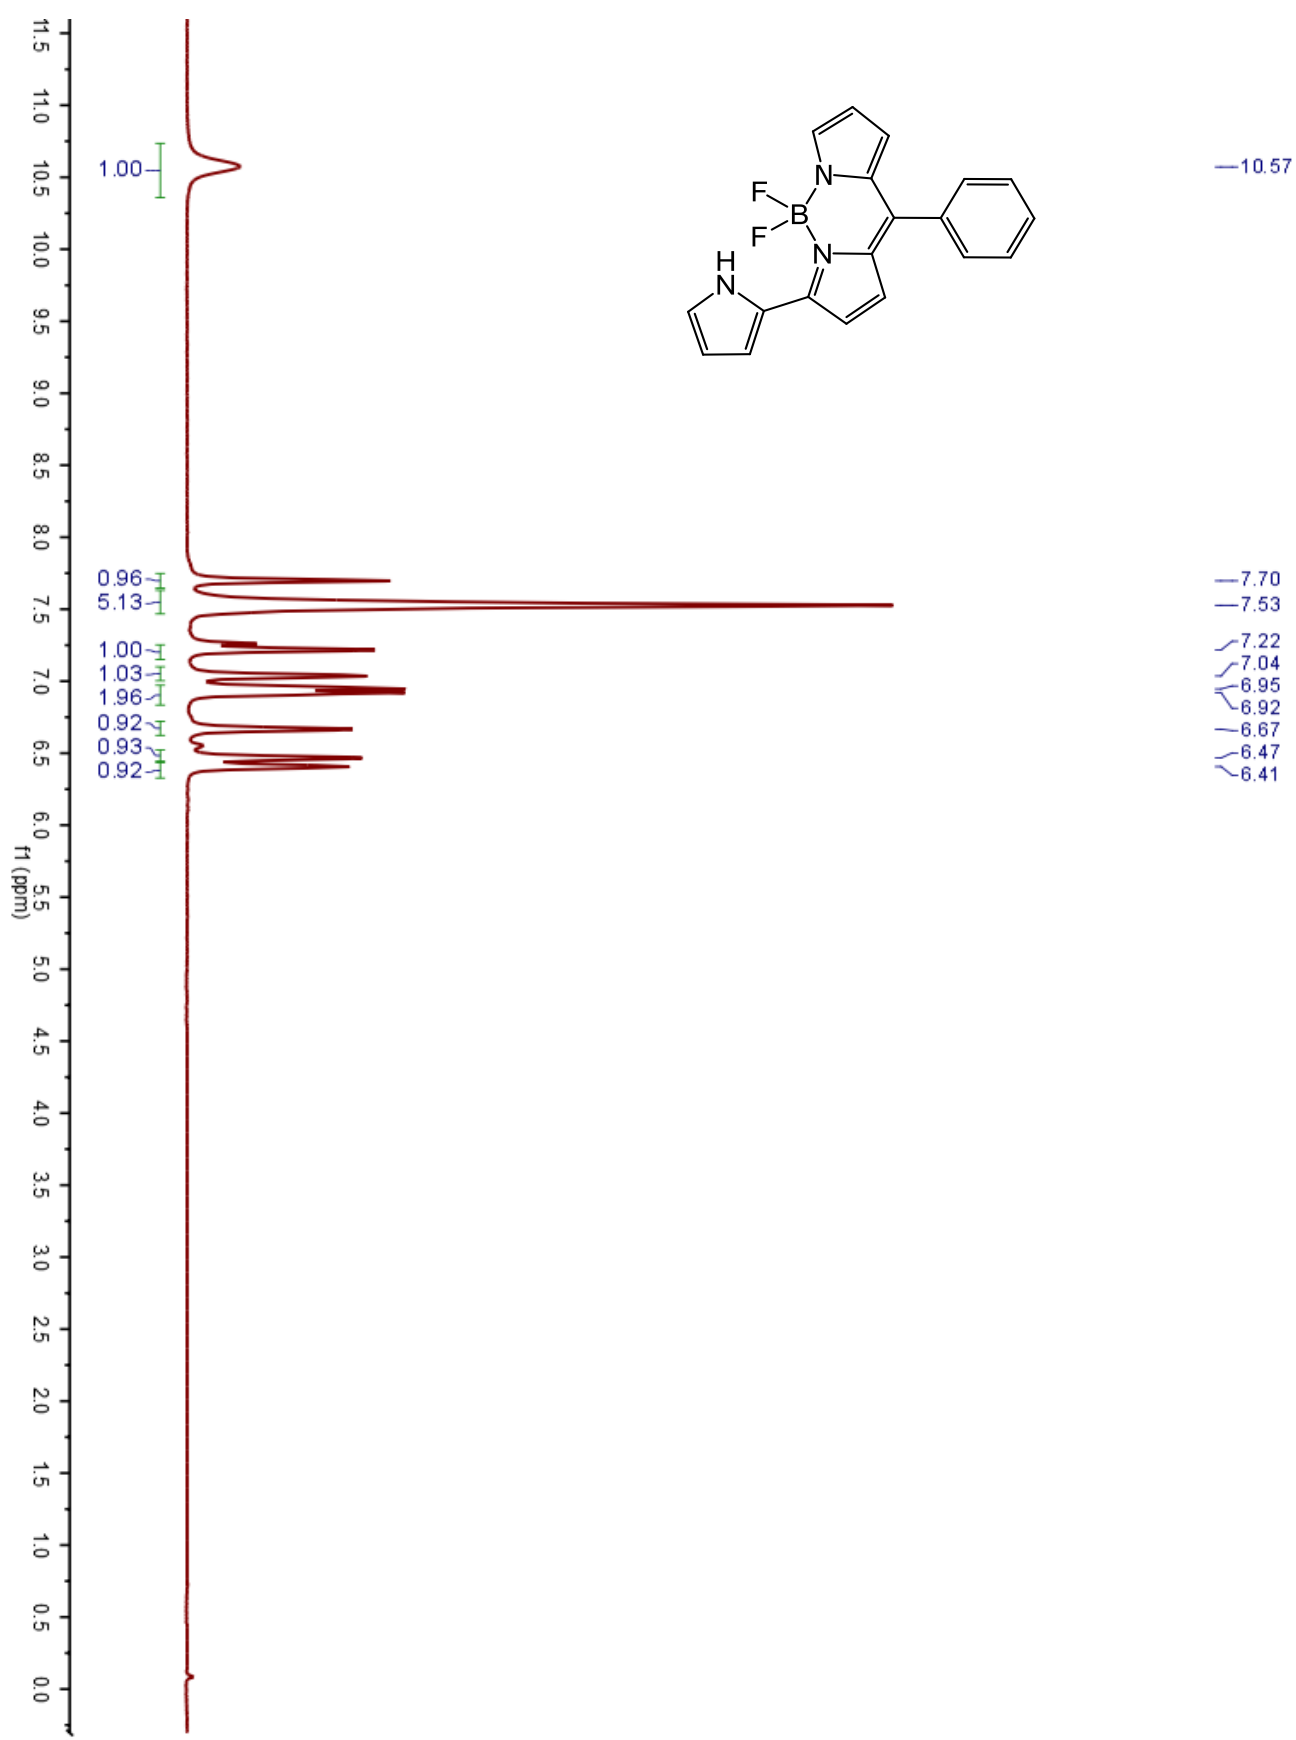

Figure S2.  $^1\text{H}$  NMR spectrum of BODIPY dye **1a** in  $\text{CDCl}_3$  solution

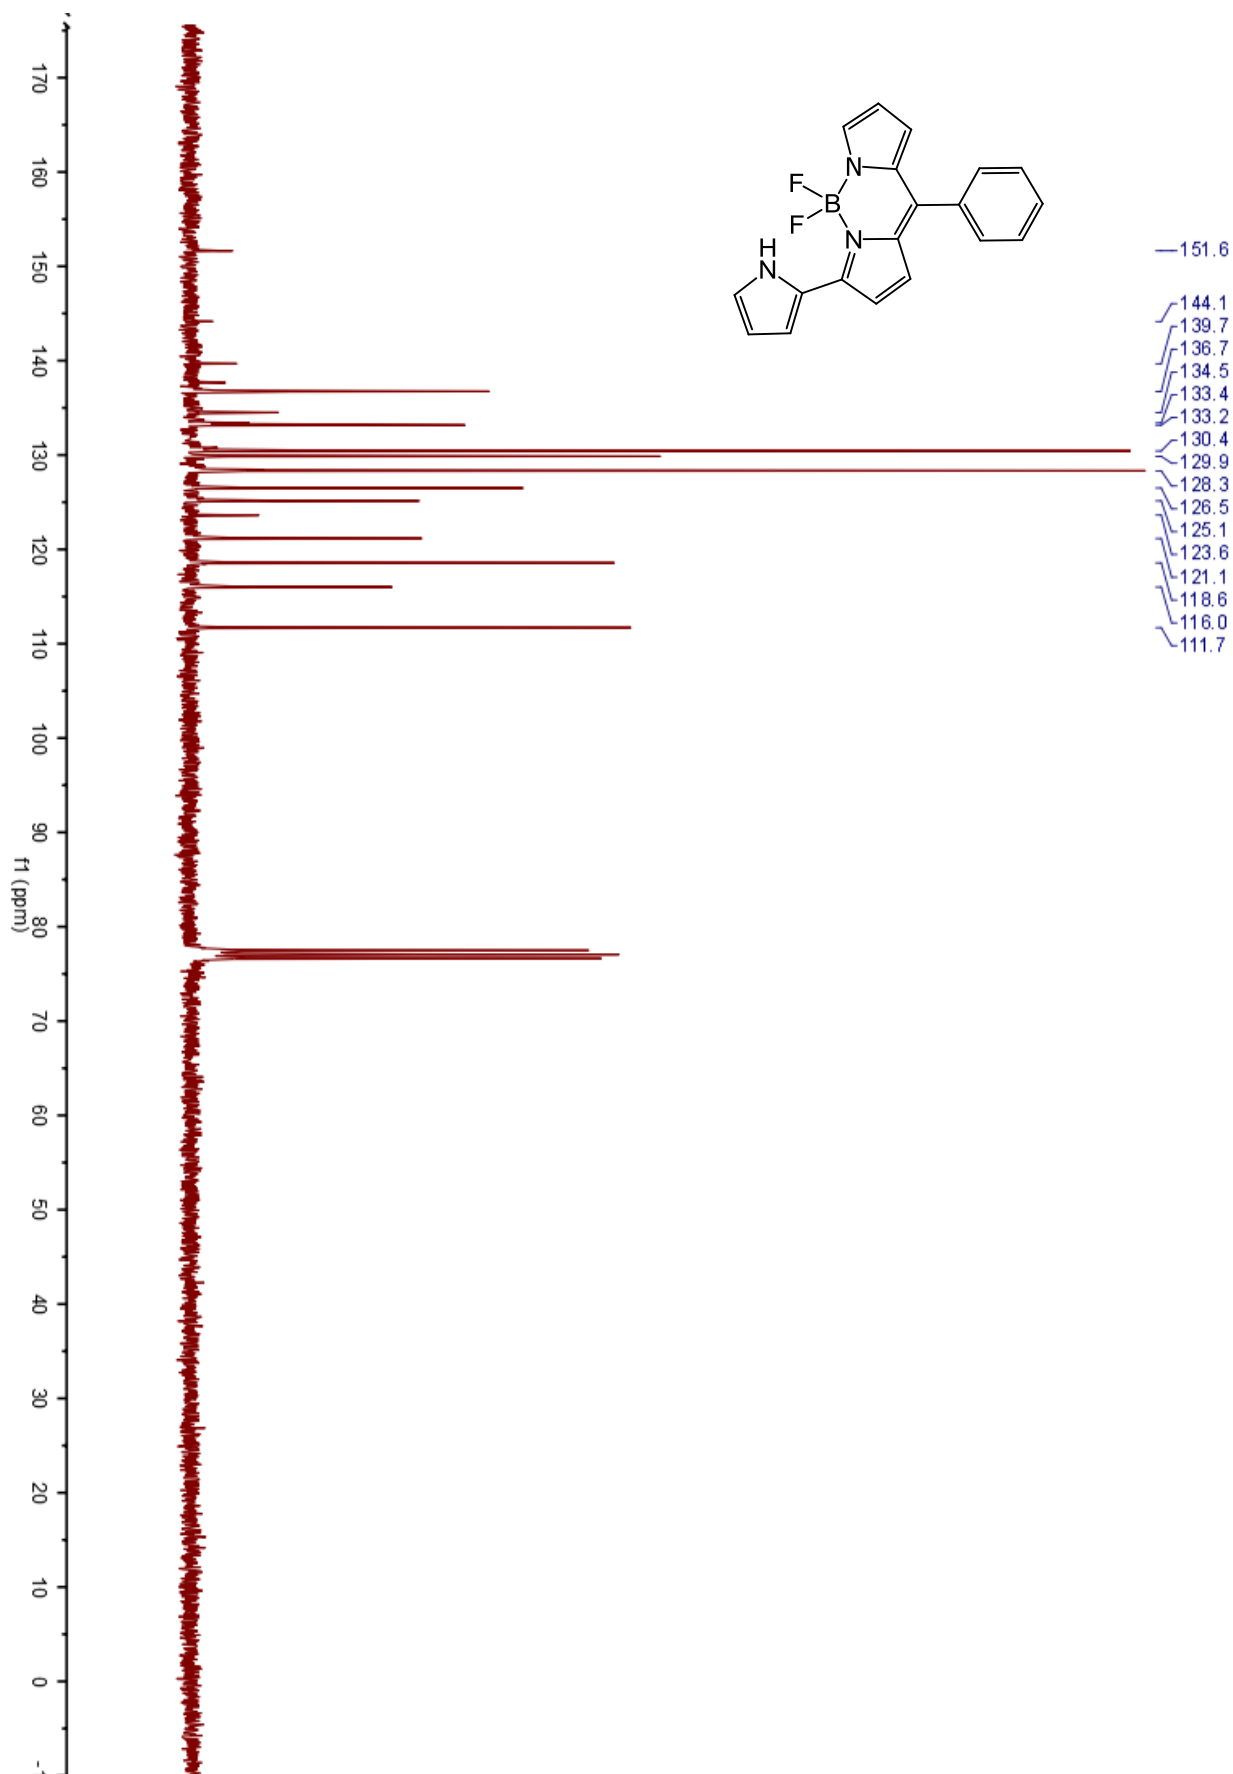

Figure S3.  $^{13}\text{C}$  NMR spectrum of BODIPY dye **1a** in  $\text{CDCl}_3$  solution

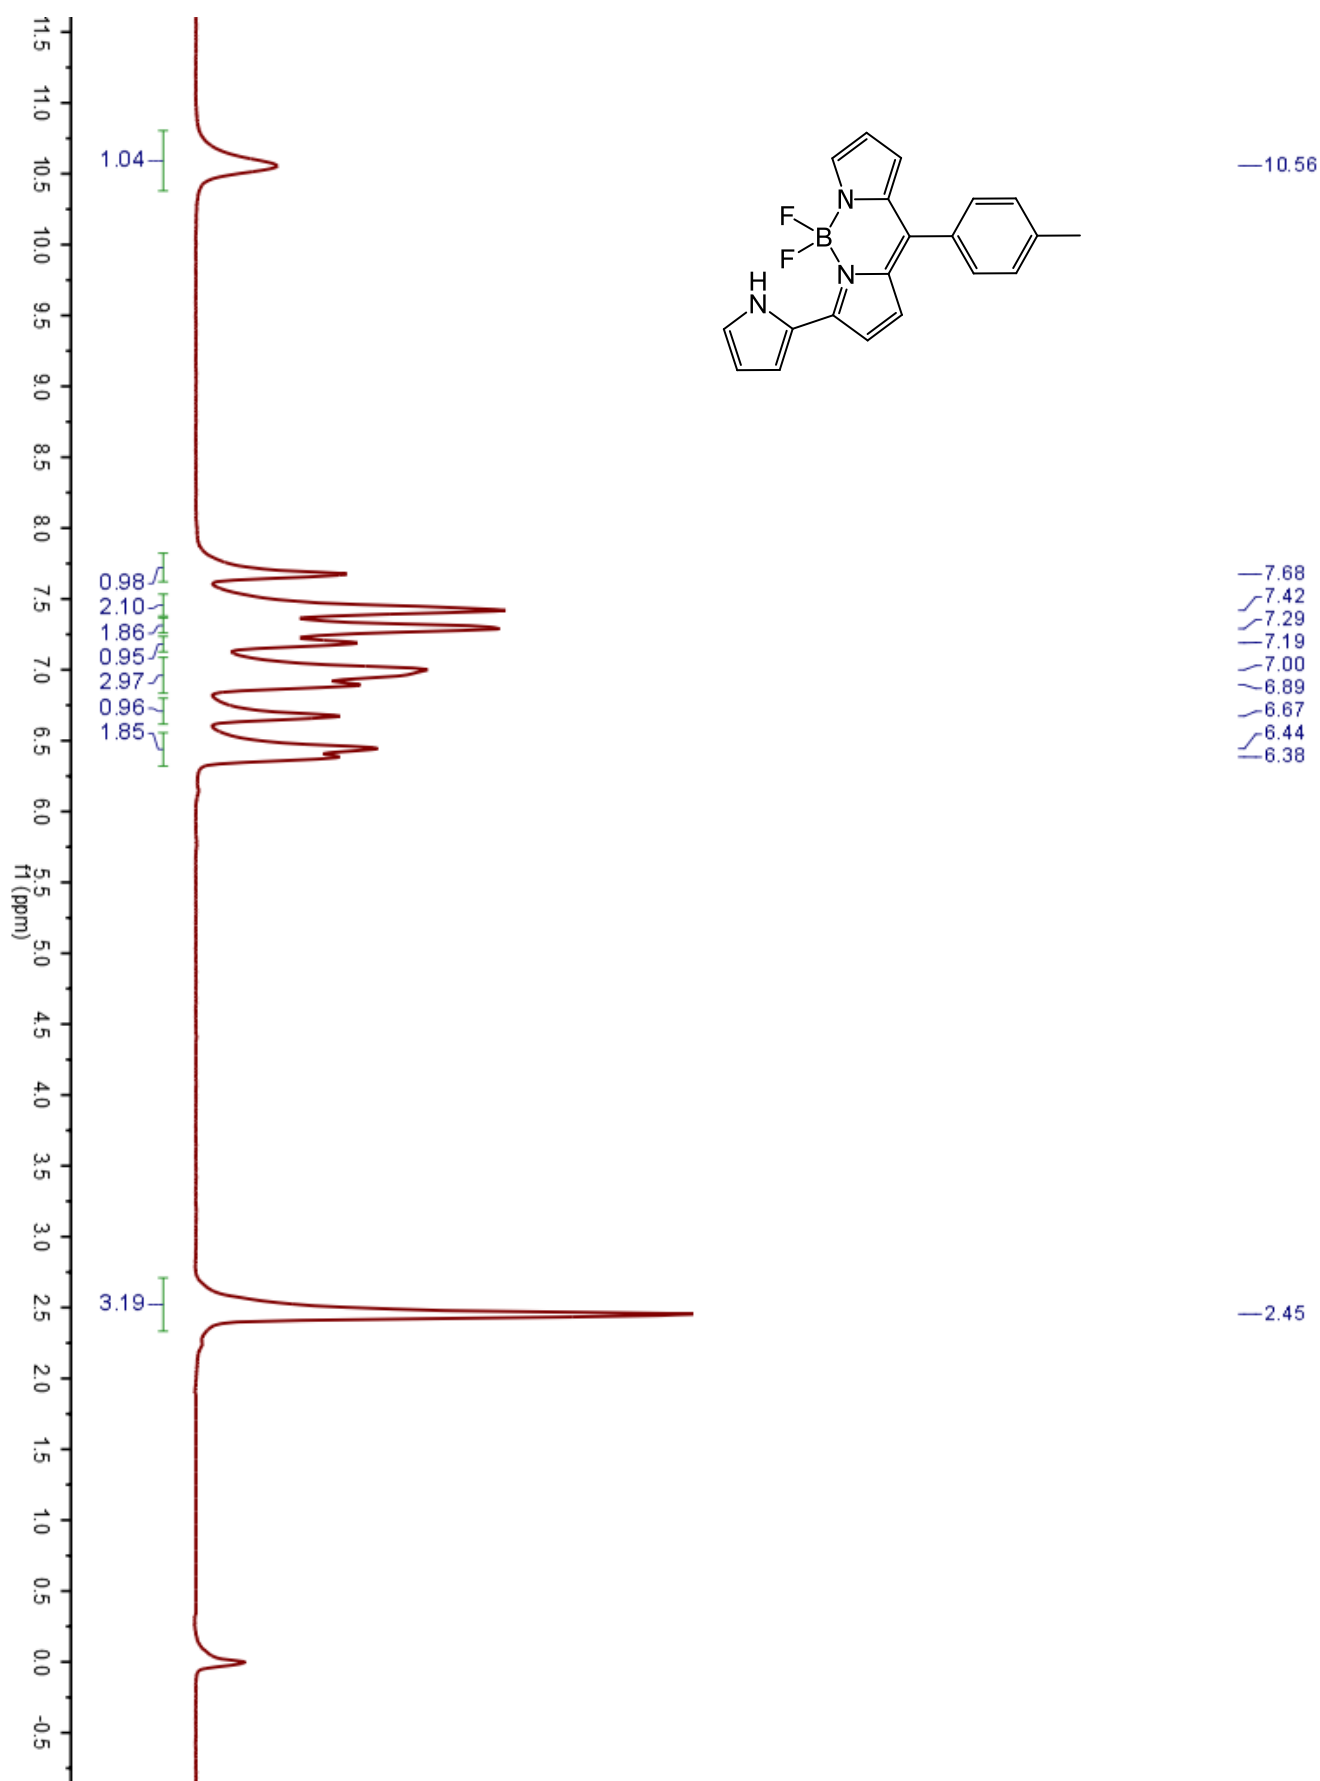

Figure S4. <sup>1</sup>H NMR spectrum of BODIPY dye **1b** in CDCl<sub>3</sub> solution

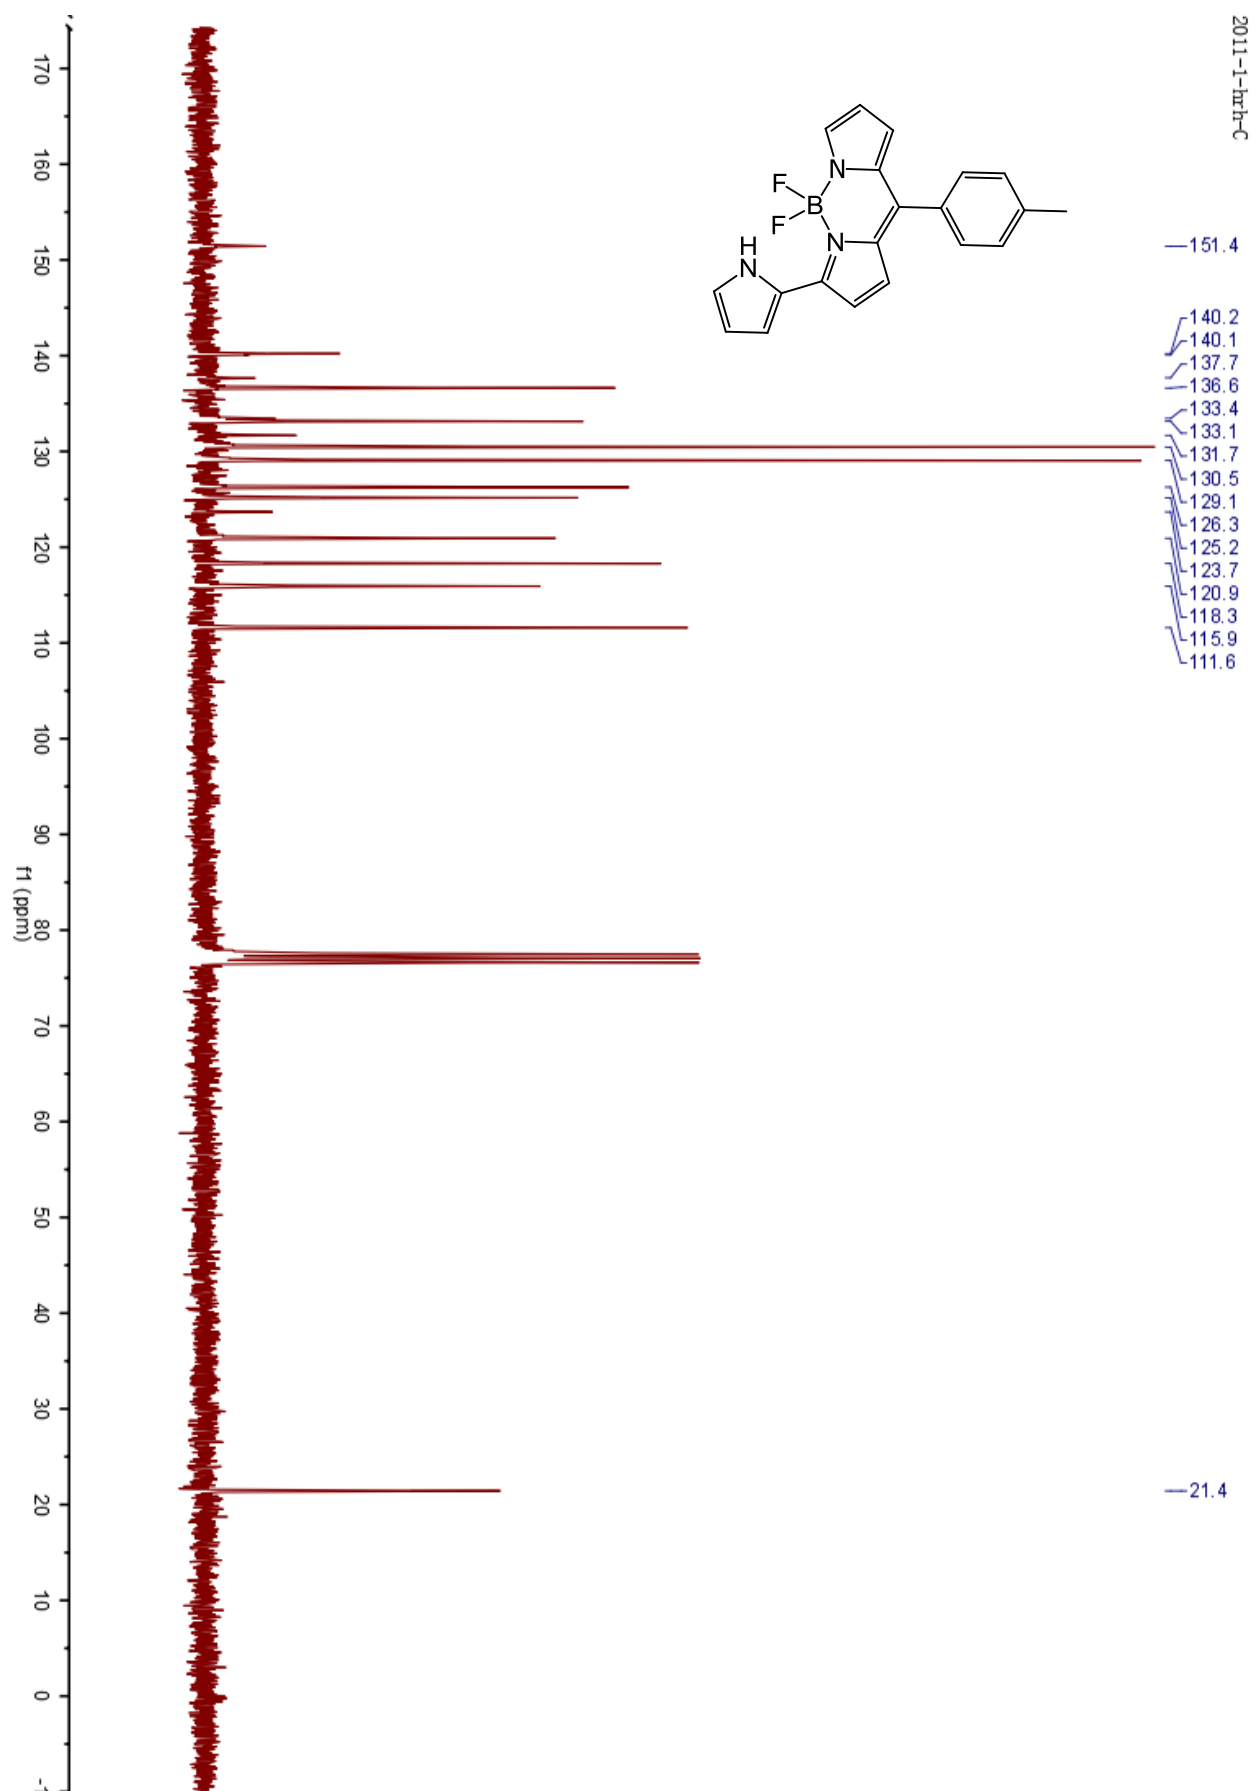

Figure S5.  $^{13}\text{C}$  NMR spectrum of BODIPY dye **1b** in  $\text{CDCl}_3$  solution

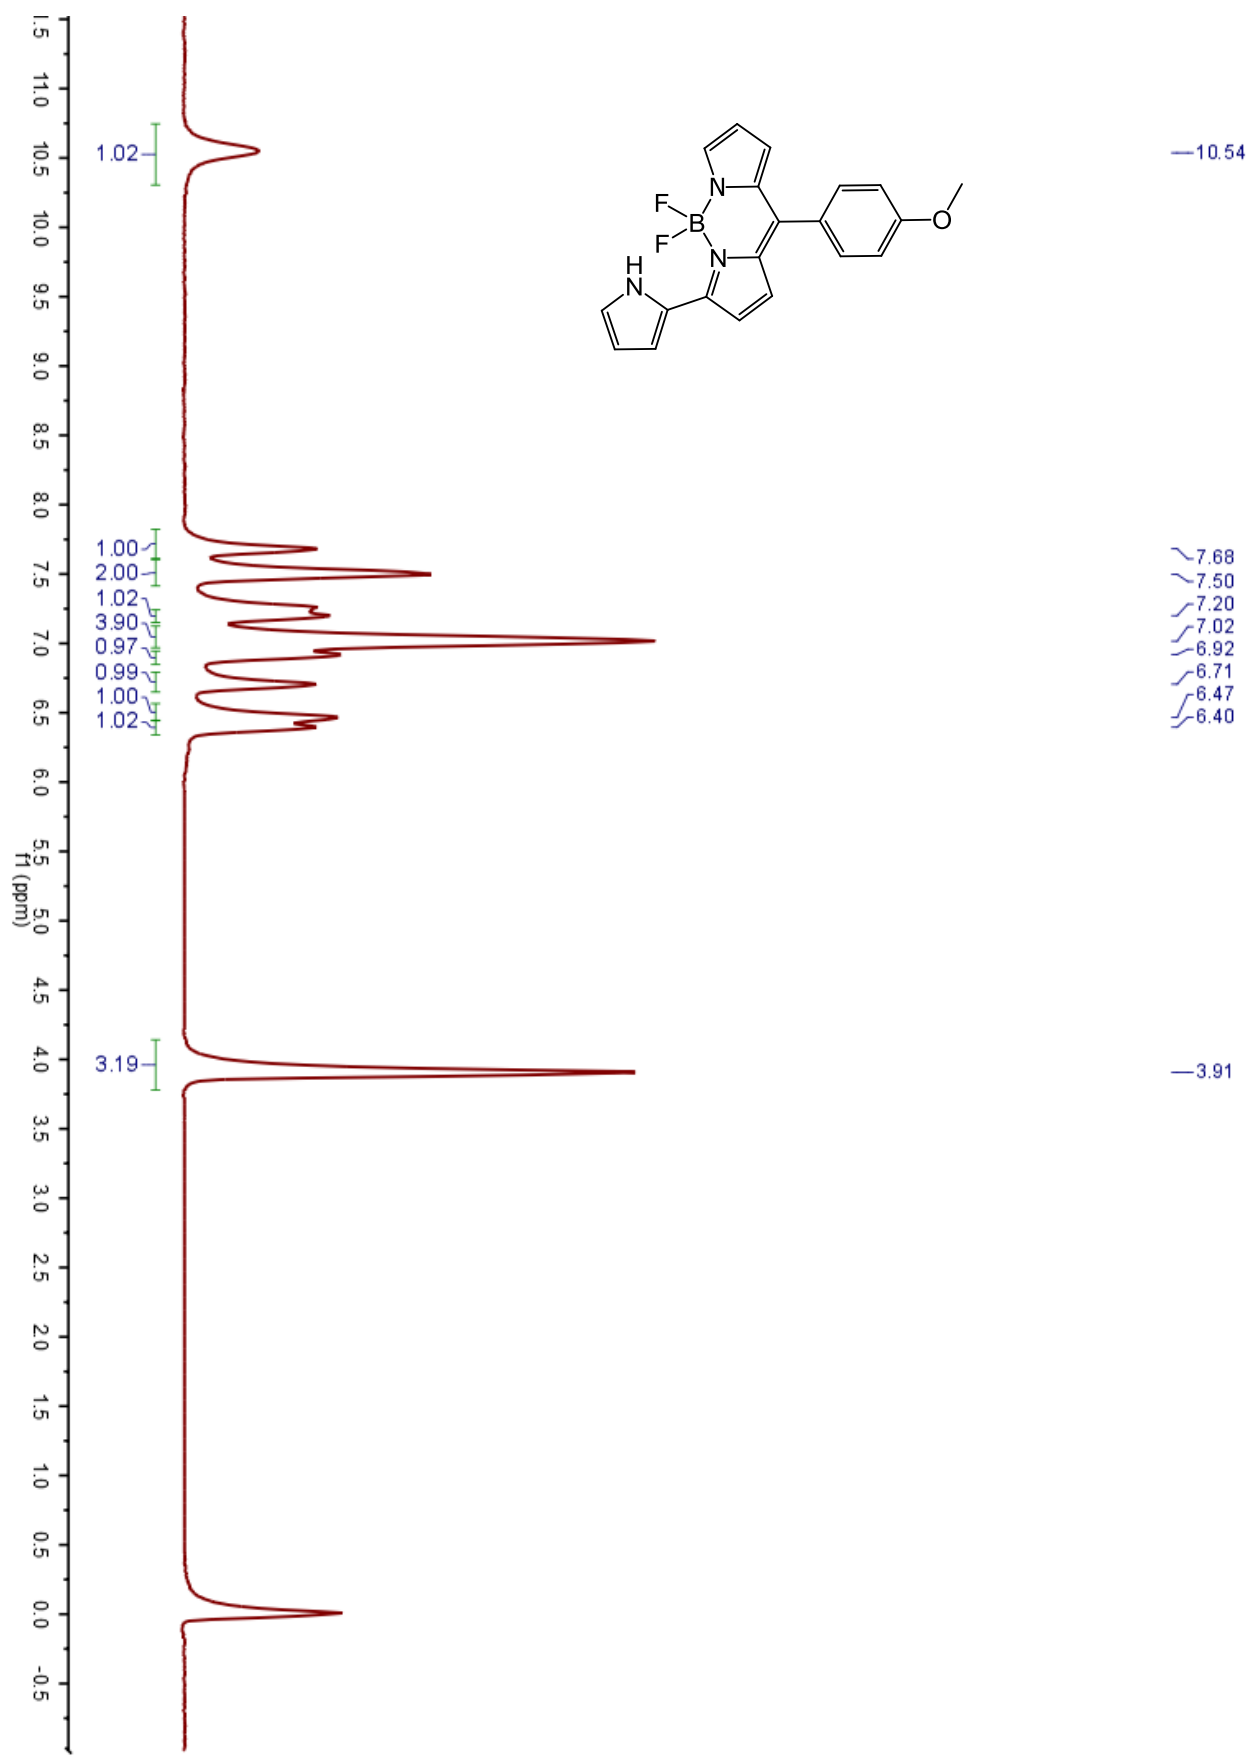

Figure S6. <sup>1</sup>H NMR spectrum of BODIPY dye **1c** in CDCl<sub>3</sub> solution



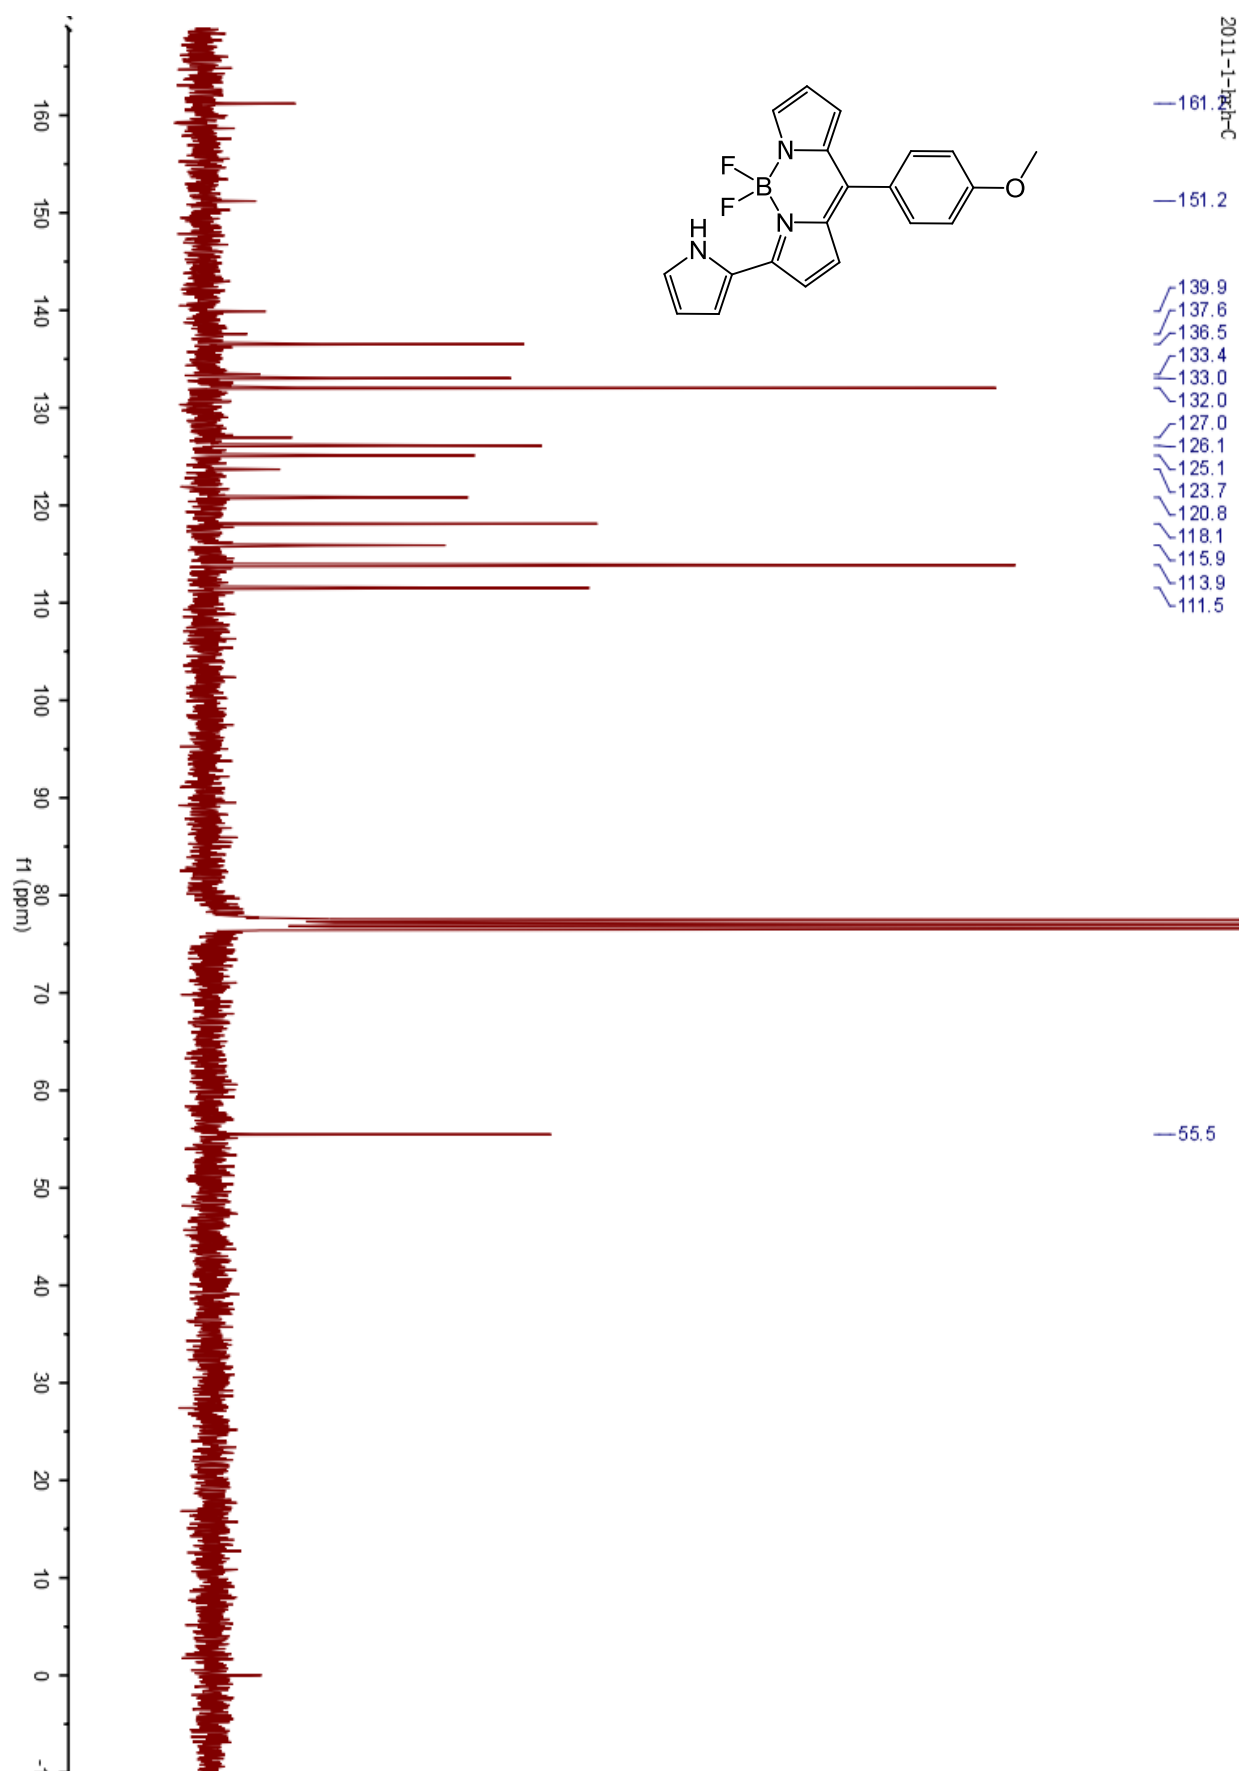

Figure S7.  $^{13}\text{C}$  NMR spectrum of BODIPY dye **1c** in  $\text{CDCl}_3$  solution

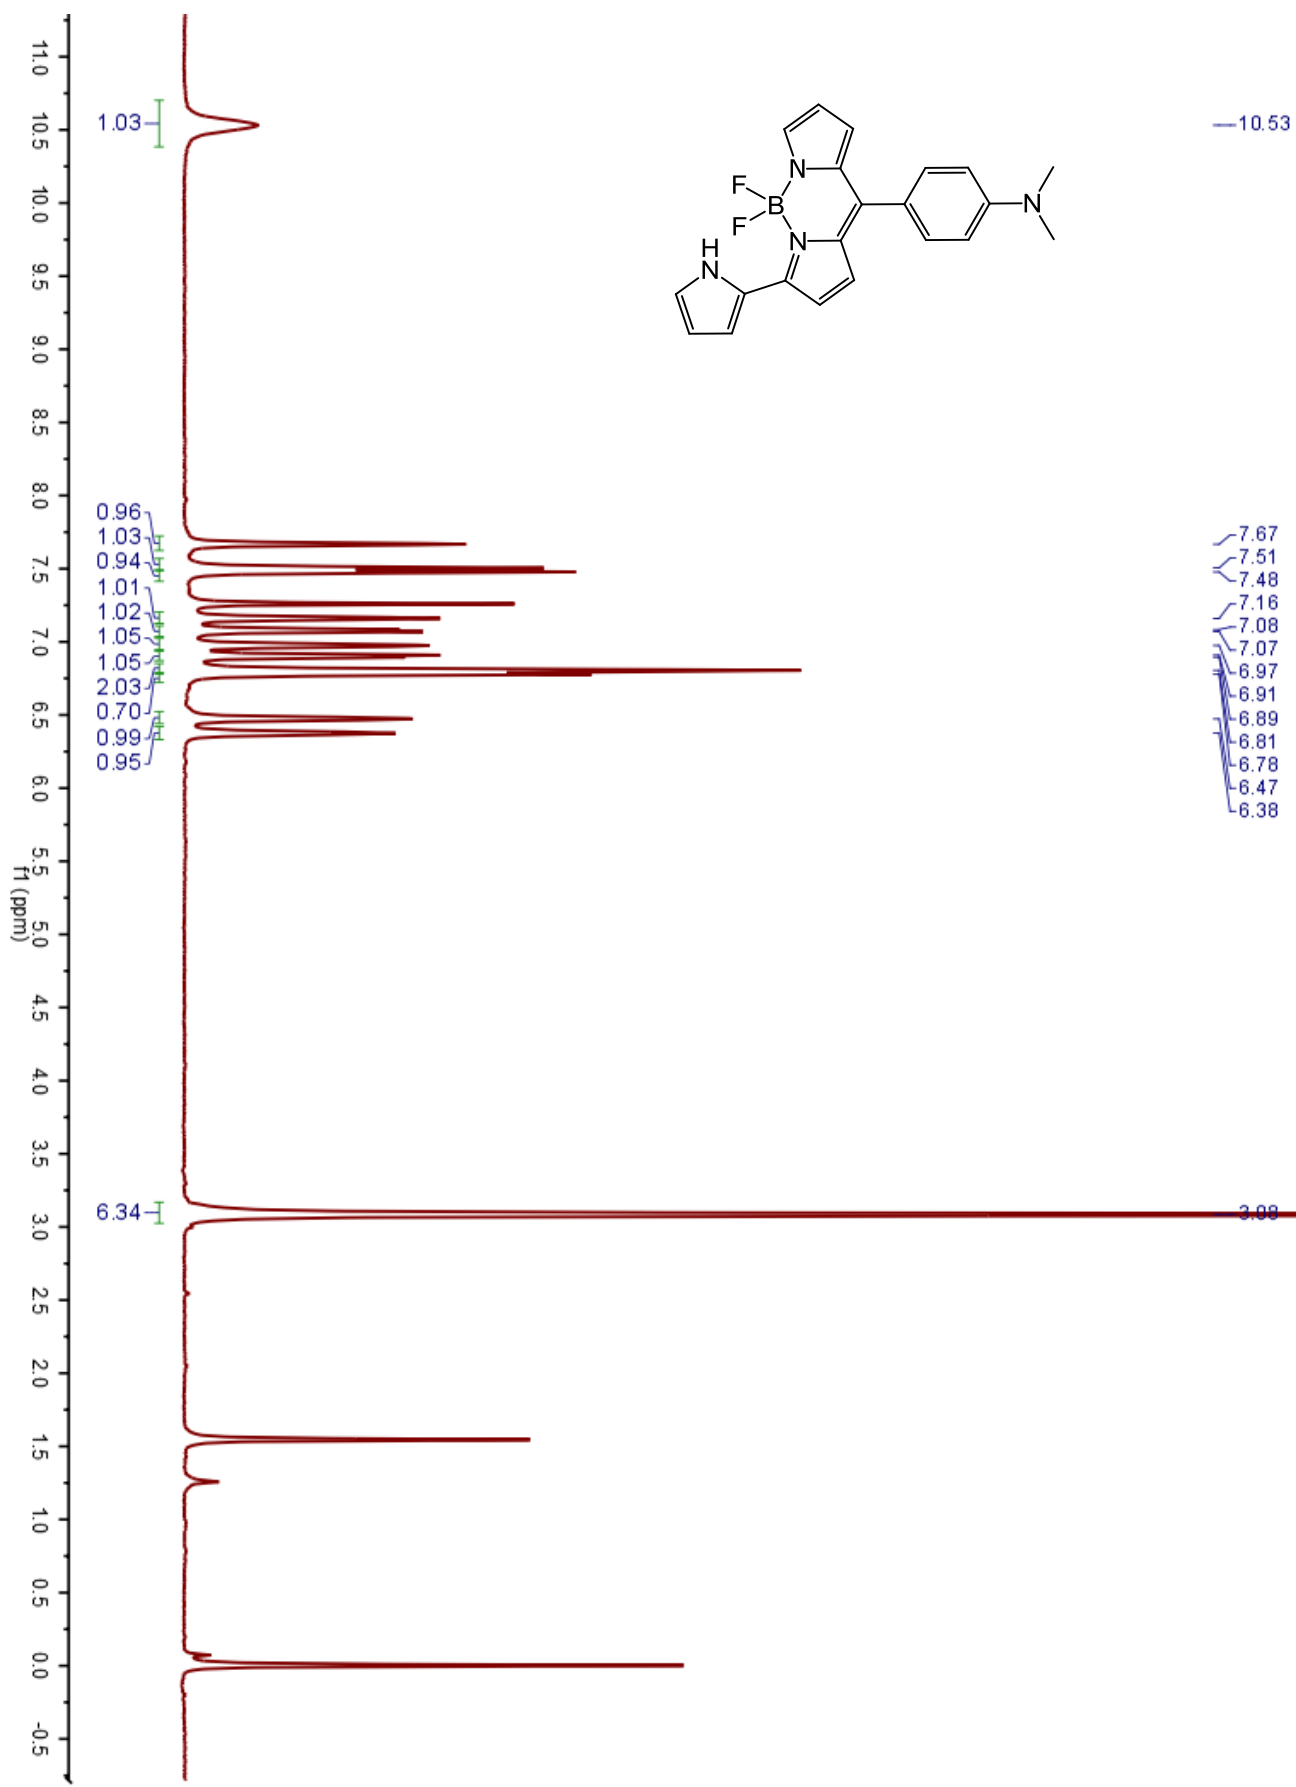

Figure S8. <sup>1</sup>H NMR spectrum of BODIPY dye **1d** in CDCl<sub>3</sub> solution

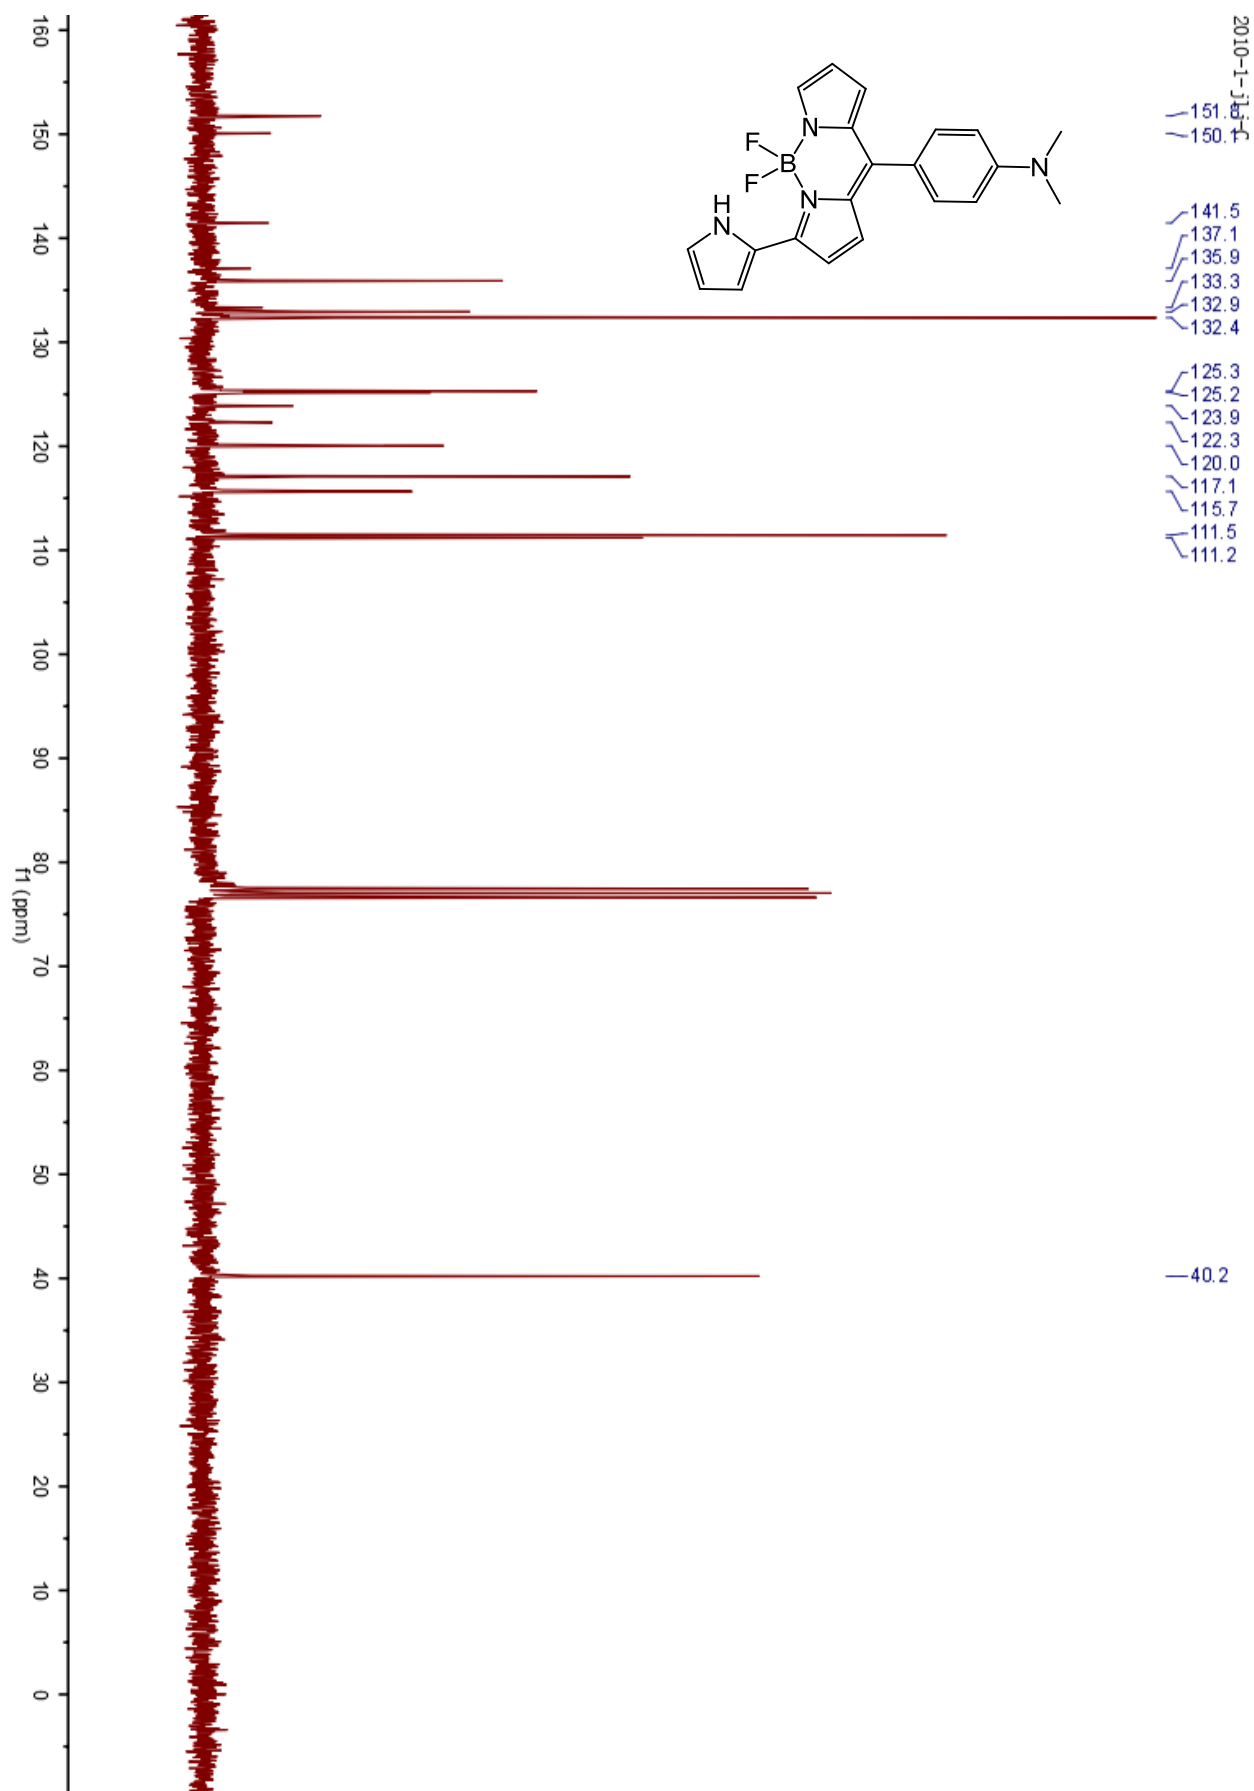

Figure S9.  $^{13}\text{C}$  NMR spectrum of BODIPY dye **1d** in  $\text{CDCl}_3$  solution

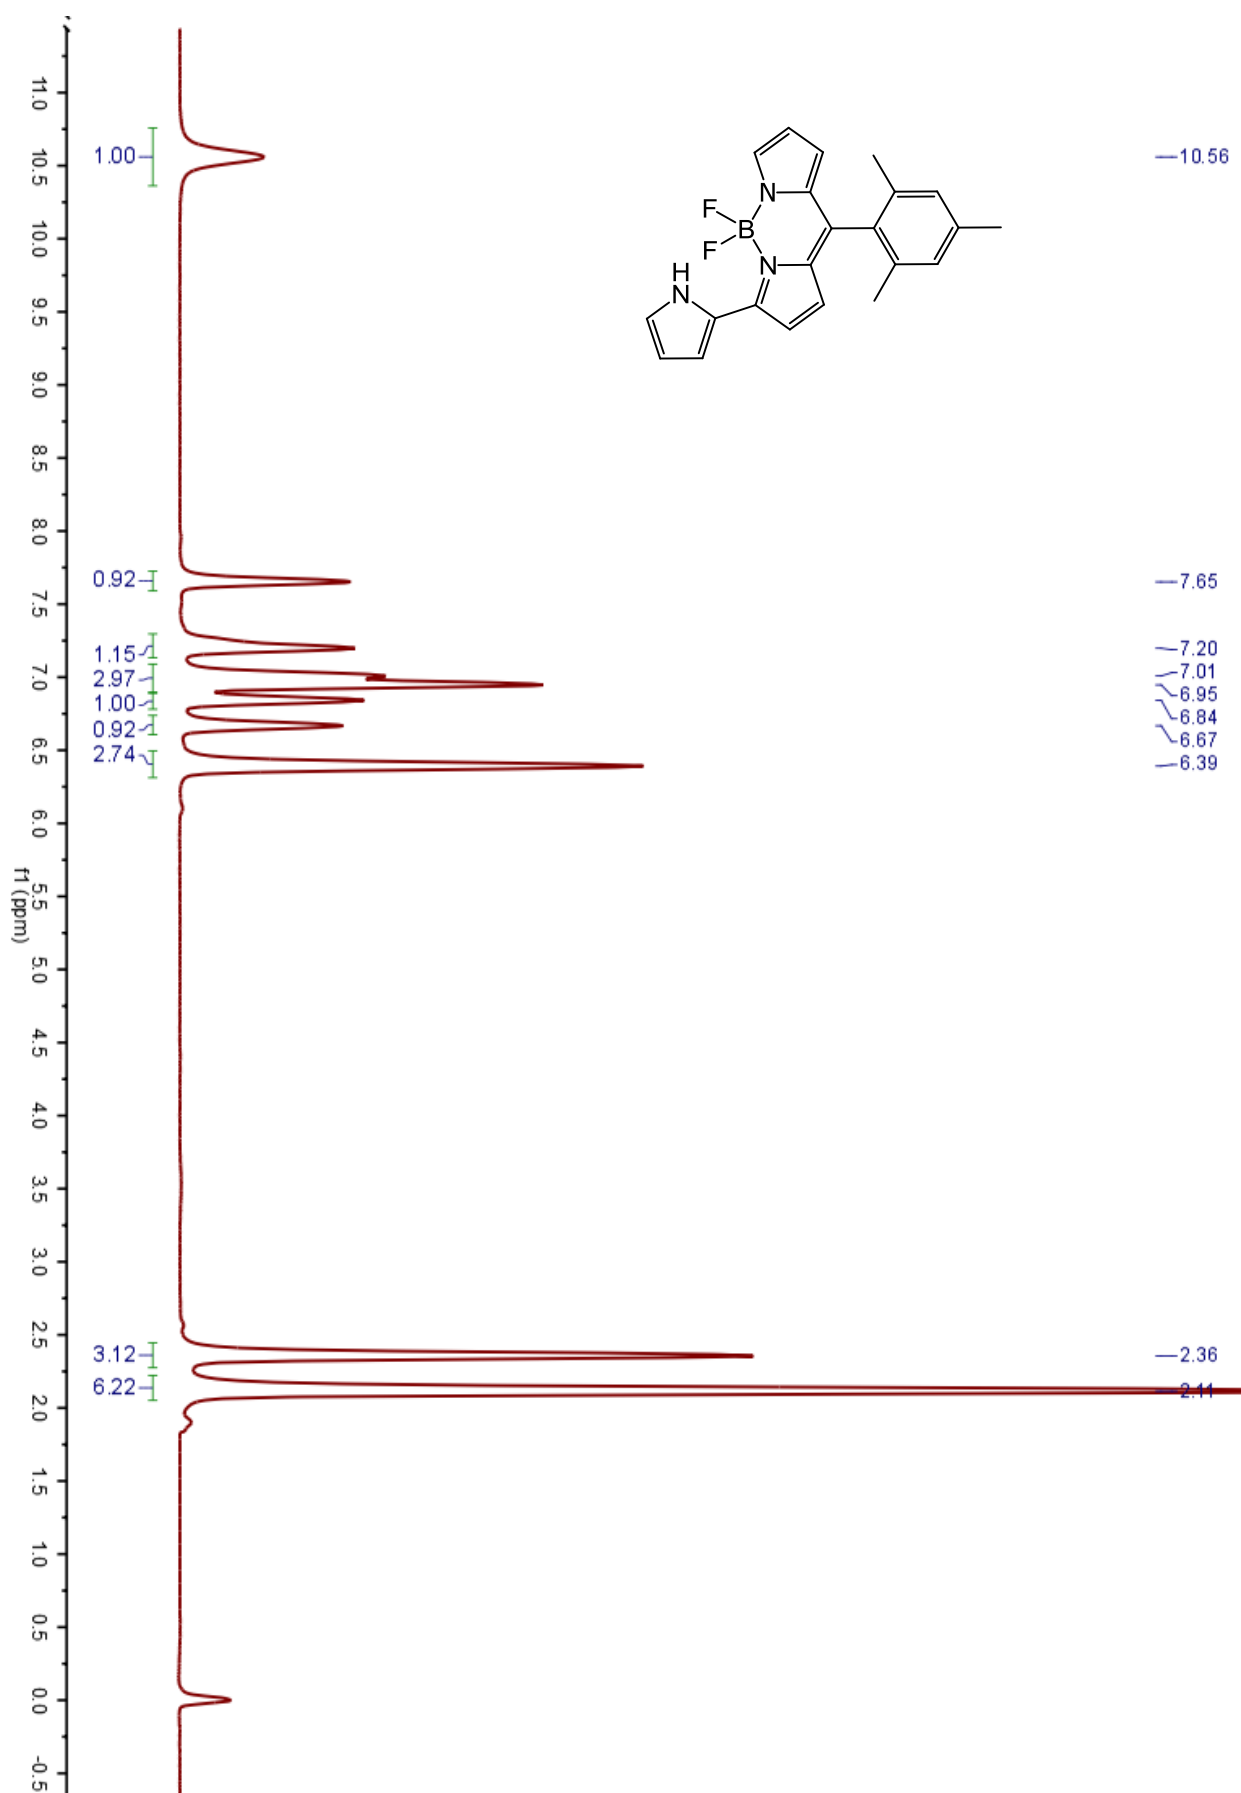

Figure S10. <sup>1</sup>H NMR spectrum of BODIPY dye **1e** in CDCl<sub>3</sub> solution

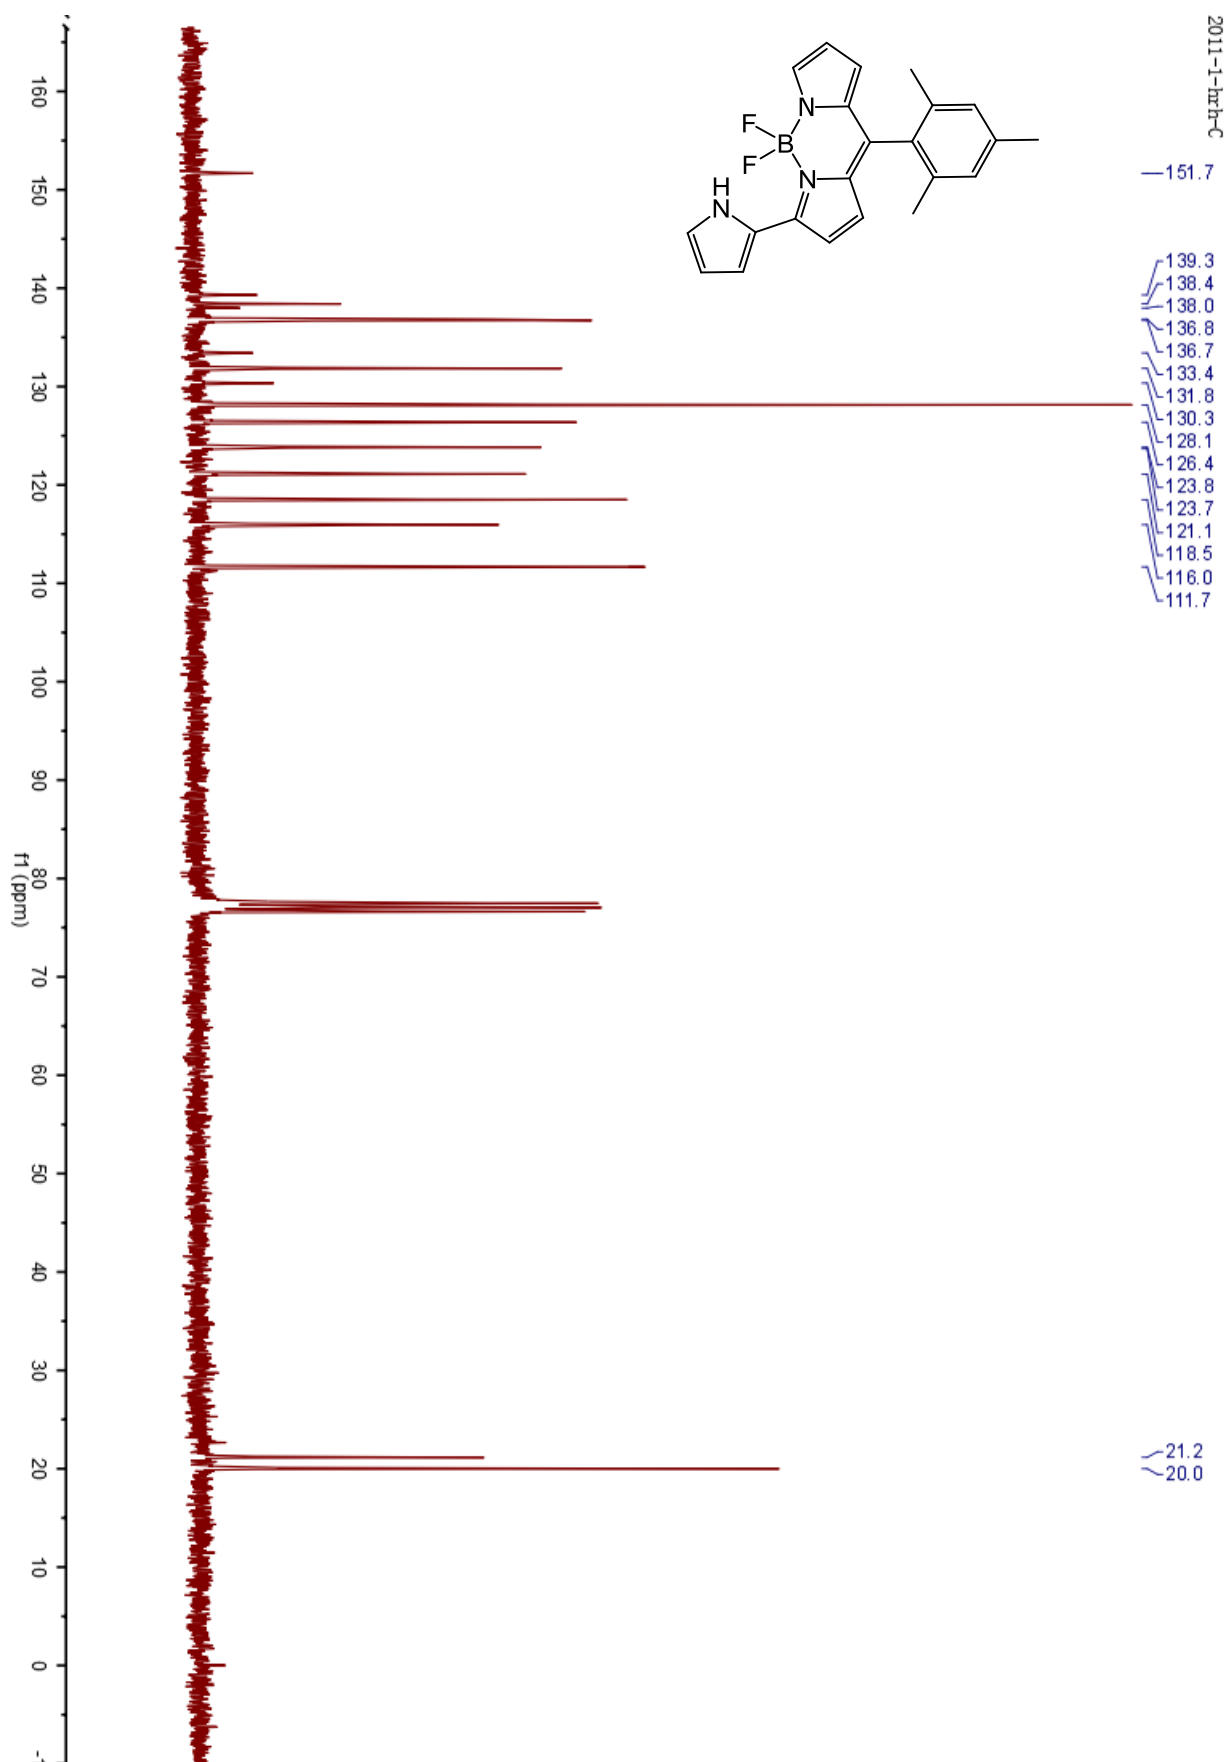

Figure S11.  $^{13}\text{C}$  NMR spectrum of BODIPY dye **1e** in  $\text{CDCl}_3$  solution

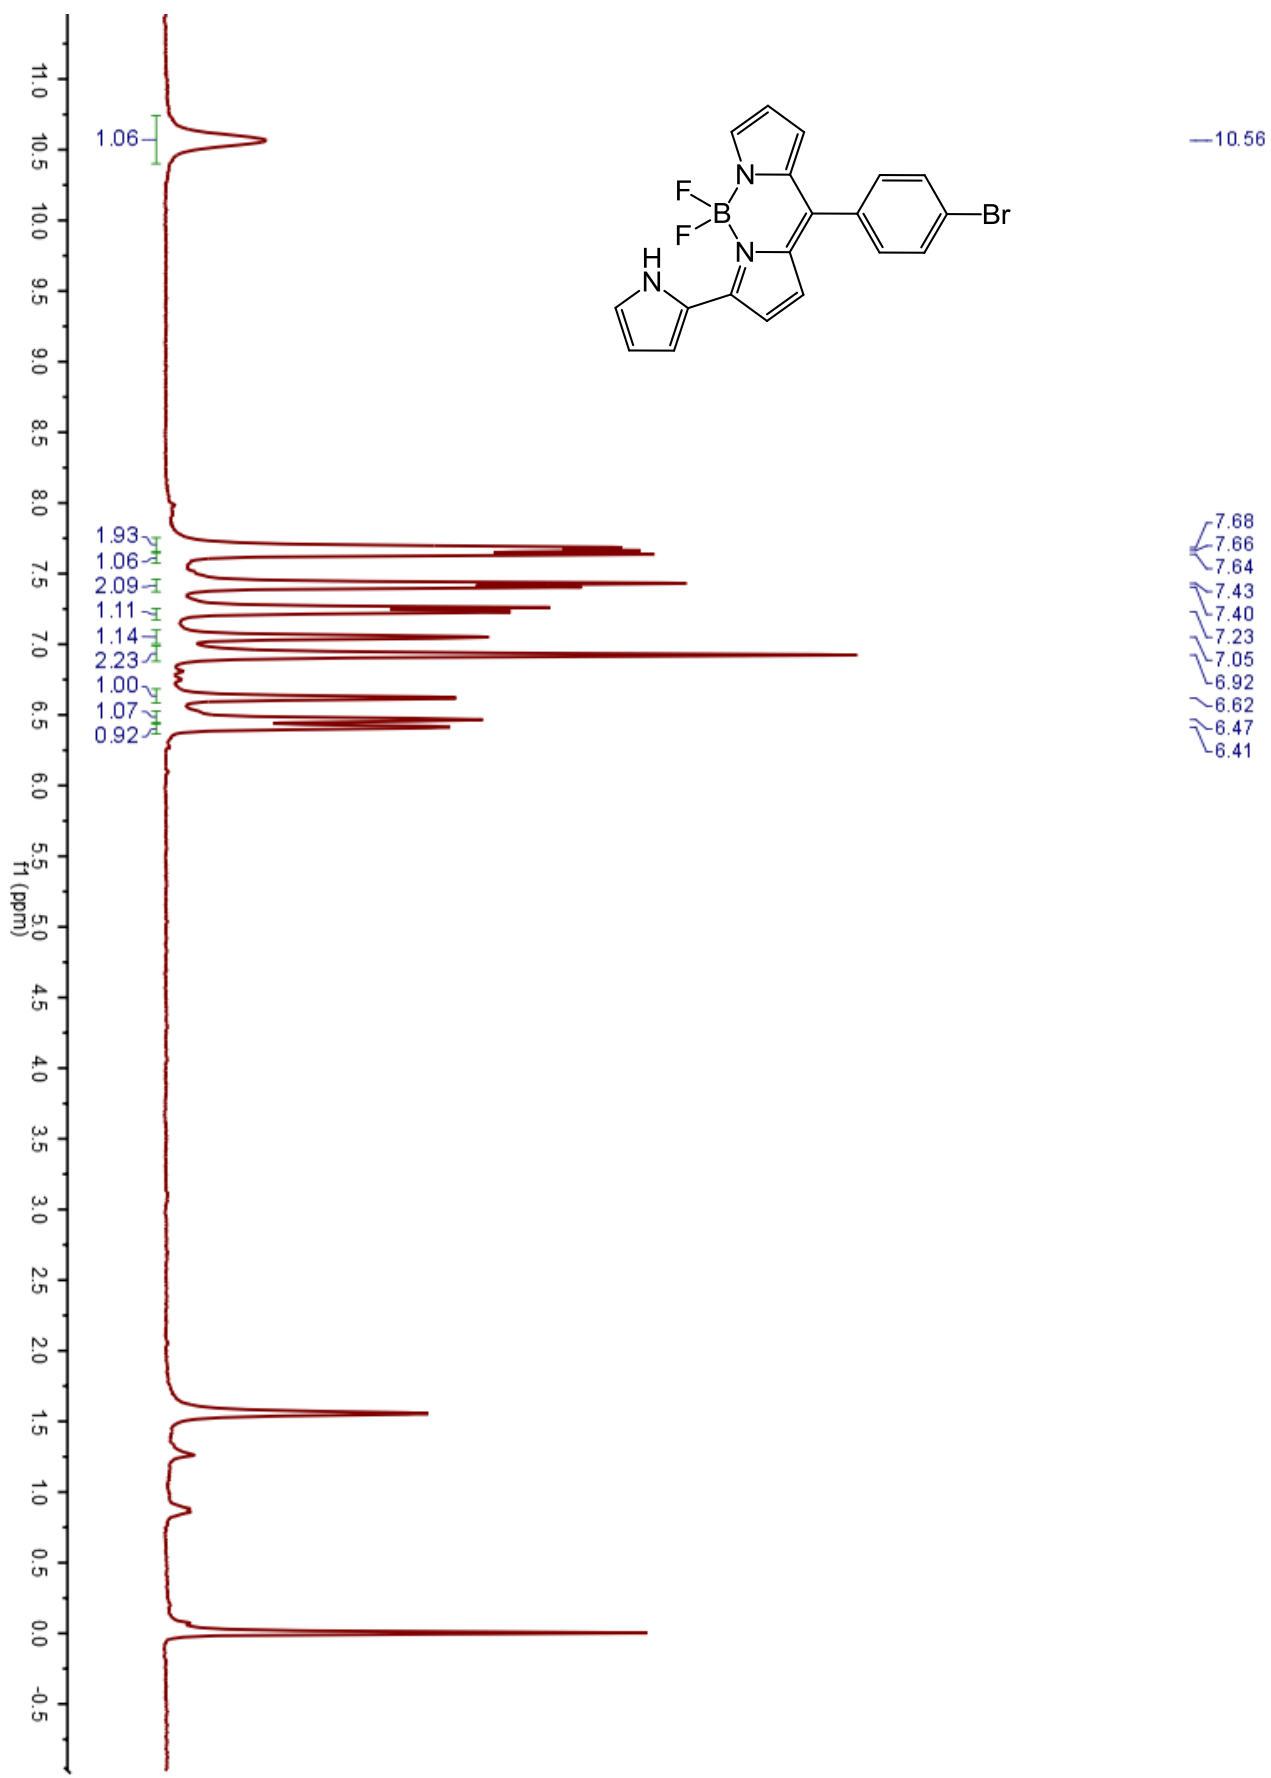

Figure S12.  $^1\text{H}$  NMR spectrum of BODIPY dye **1f** in  $\text{CDCl}_3$  solution

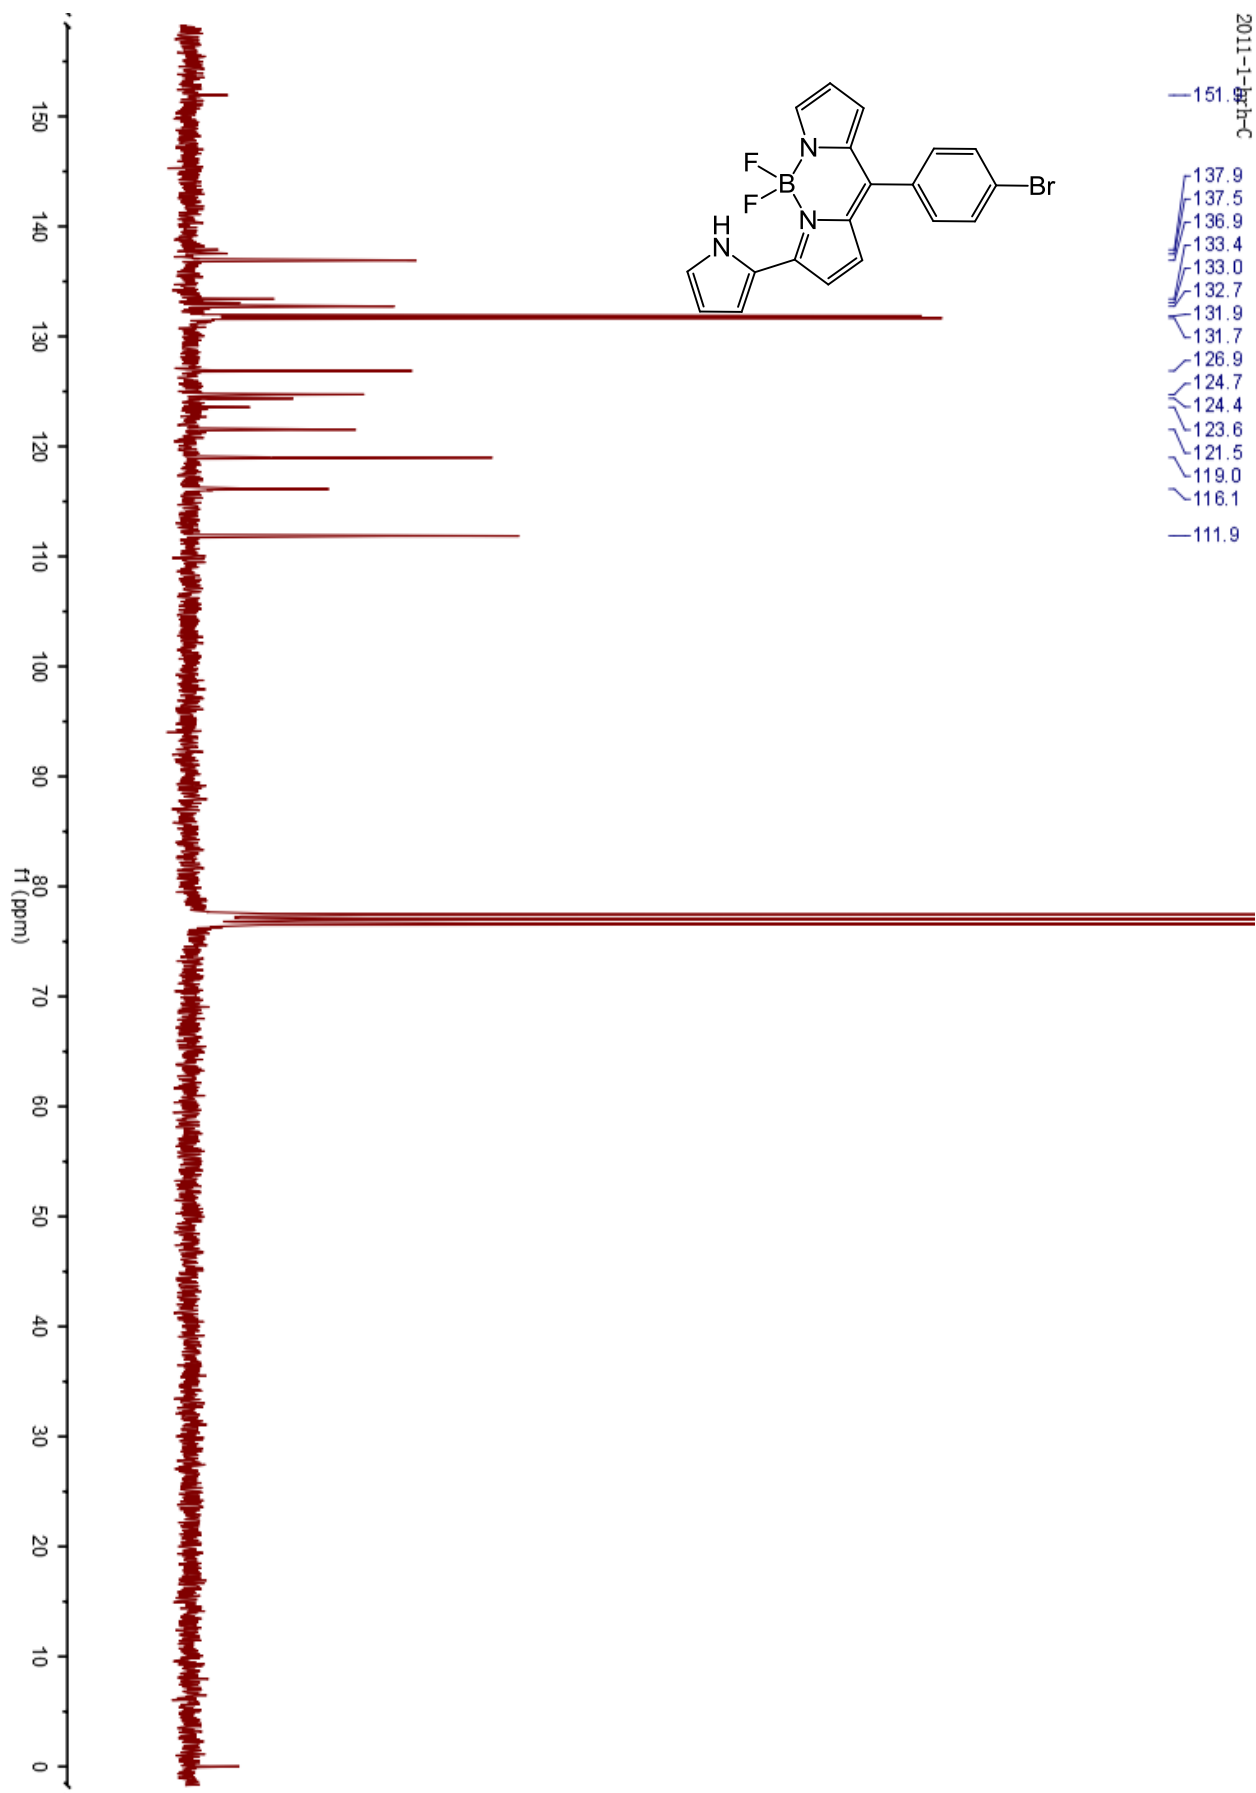

Figure S13.  $^{13}\text{C}$  NMR spectrum of BODIPY dye **1f** in  $\text{CDCl}_3$  solution

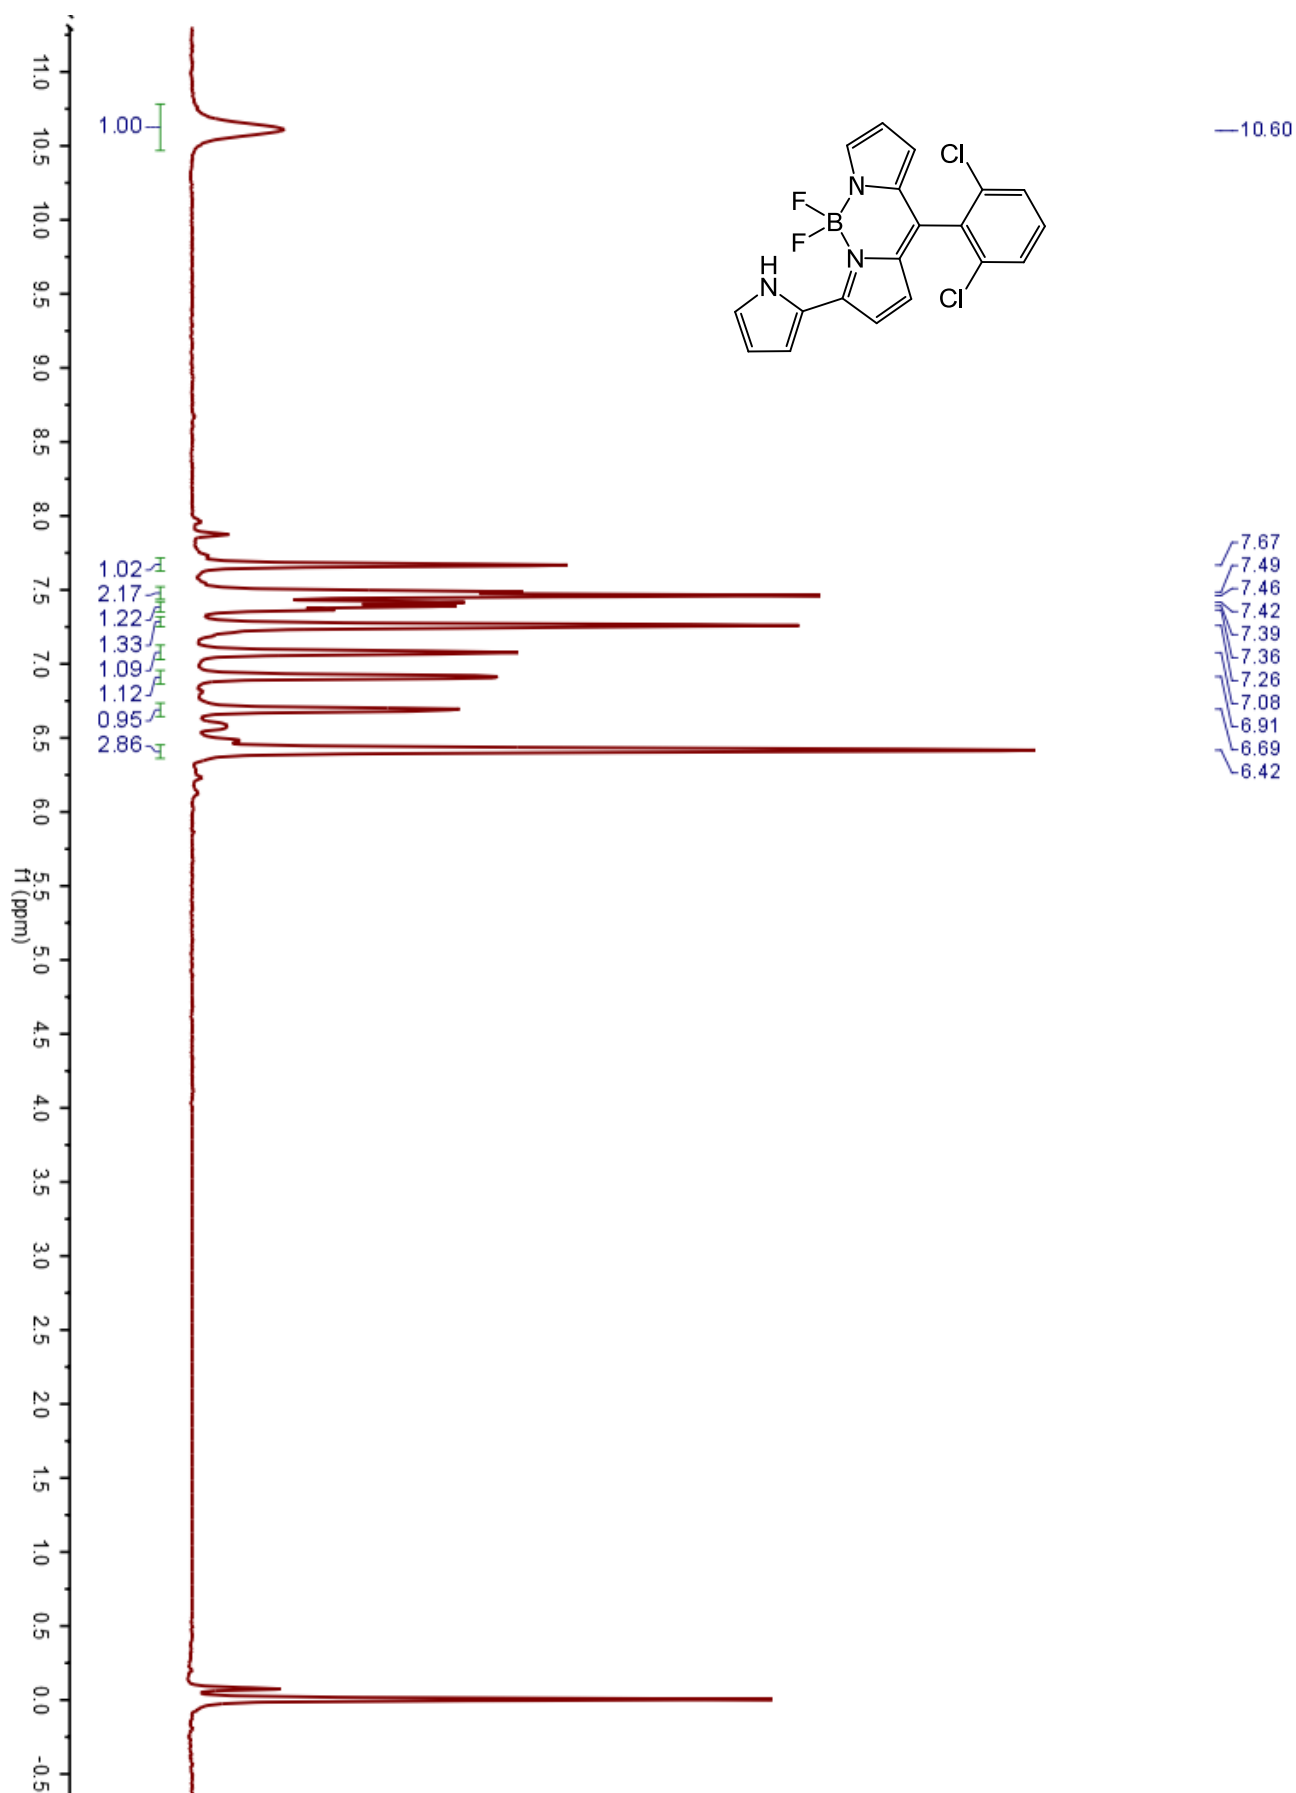

Figure S14.  $^1\text{H}$  NMR spectrum of BODIPY dye **1g** in  $\text{CDCl}_3$  solution



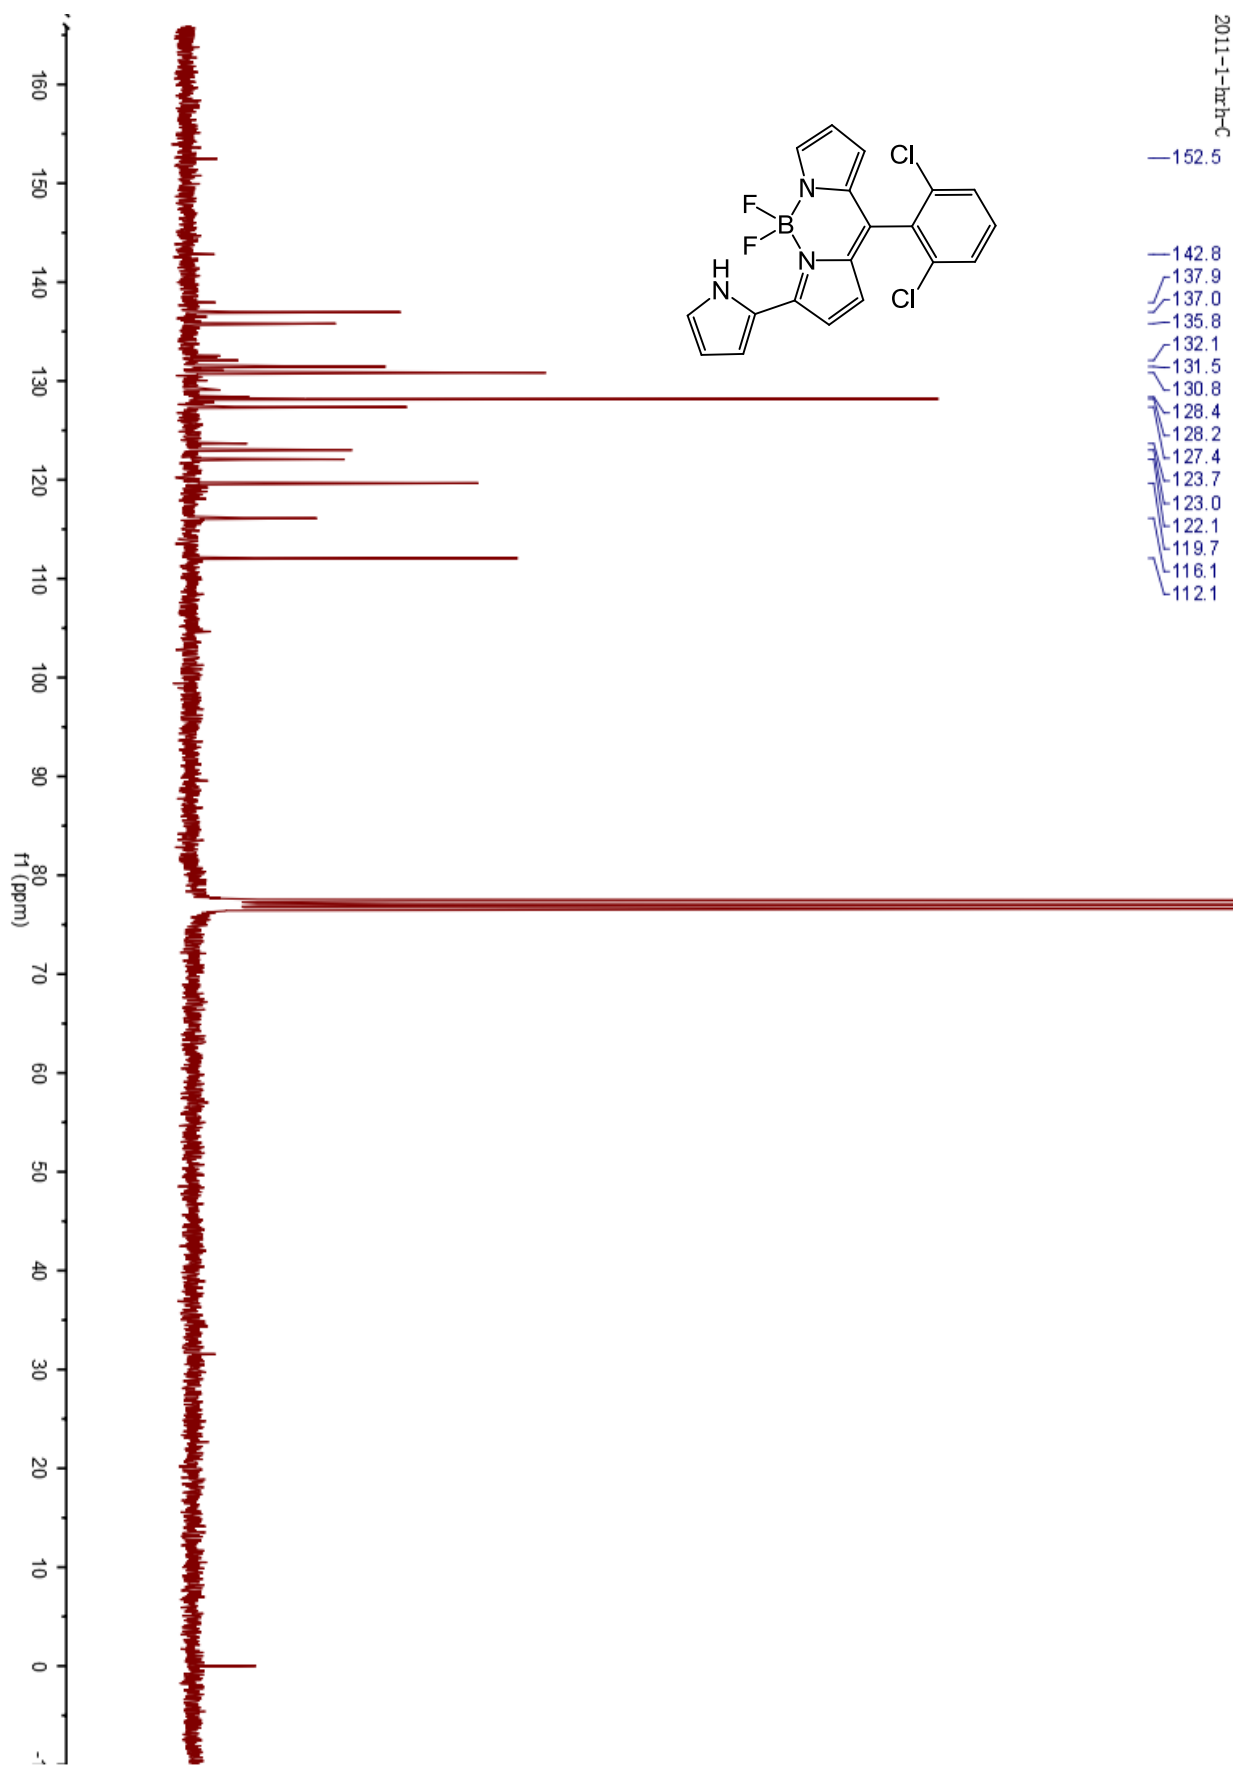

Figure S15.  $^{13}\text{C}$  NMR spectrum of BODIPY dye **1g** in  $\text{CDCl}_3$  solution

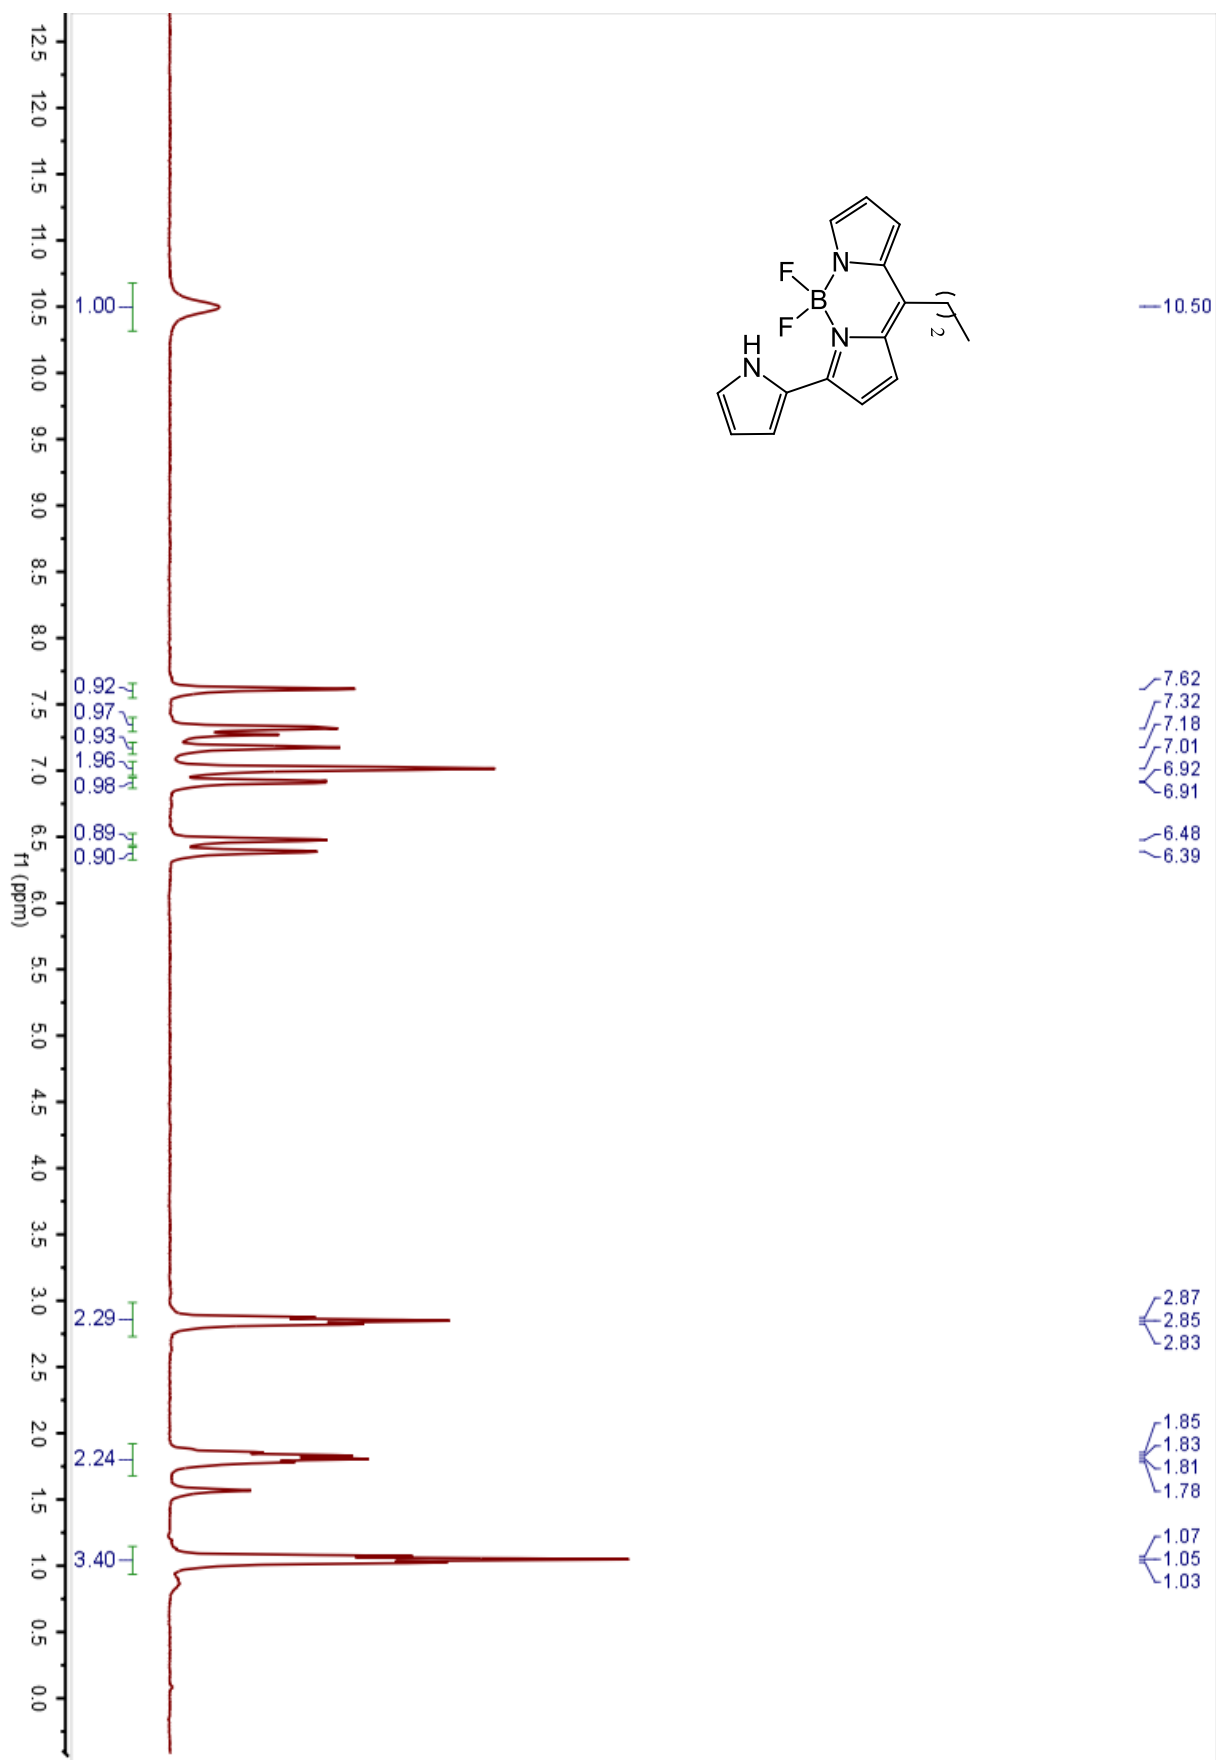

Figure S16. <sup>1</sup>H NMR spectrum of BODIPY dye **1h** in CDCl<sub>3</sub> solution

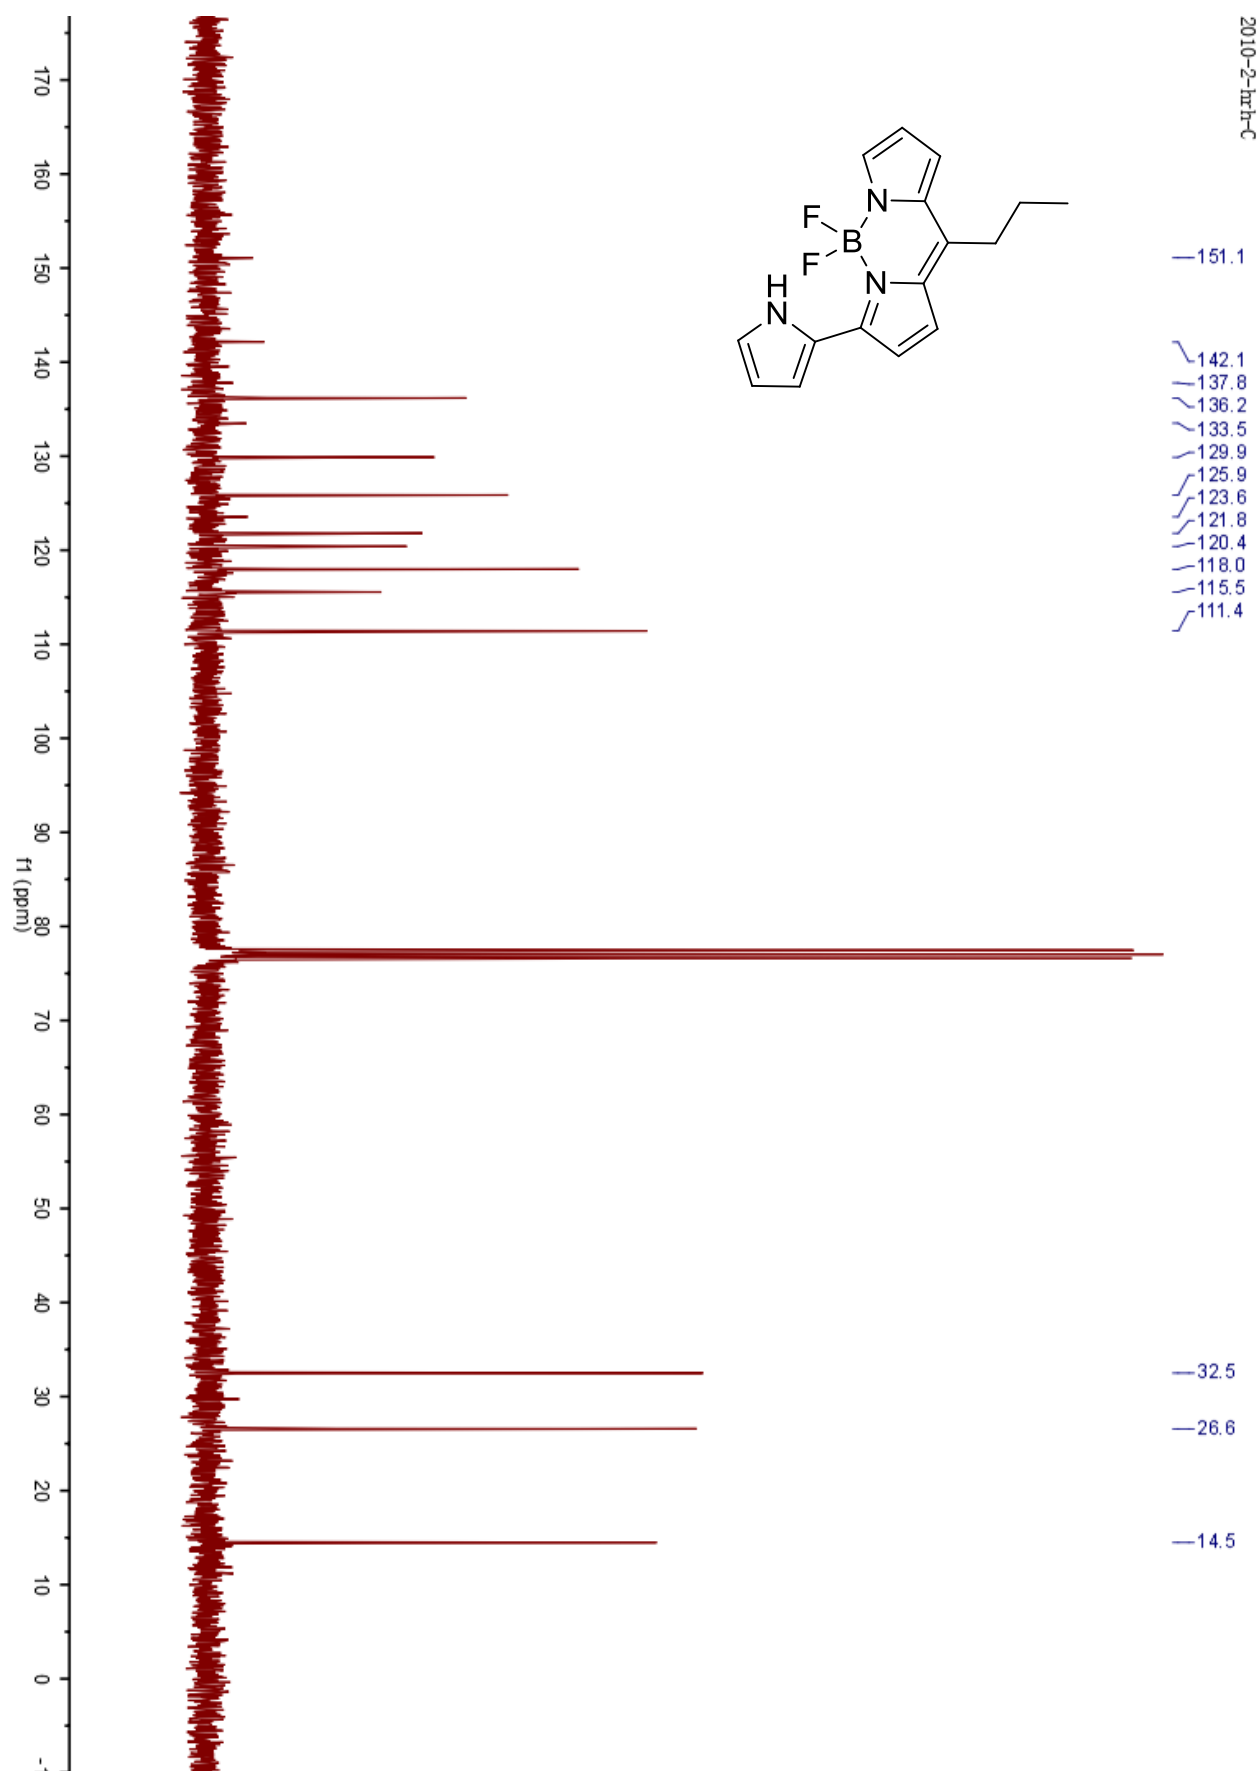

Figure S17.  $^{13}\text{C}$  NMR spectrum of BODIPY dye **1h** in  $\text{CDCl}_3$  solution

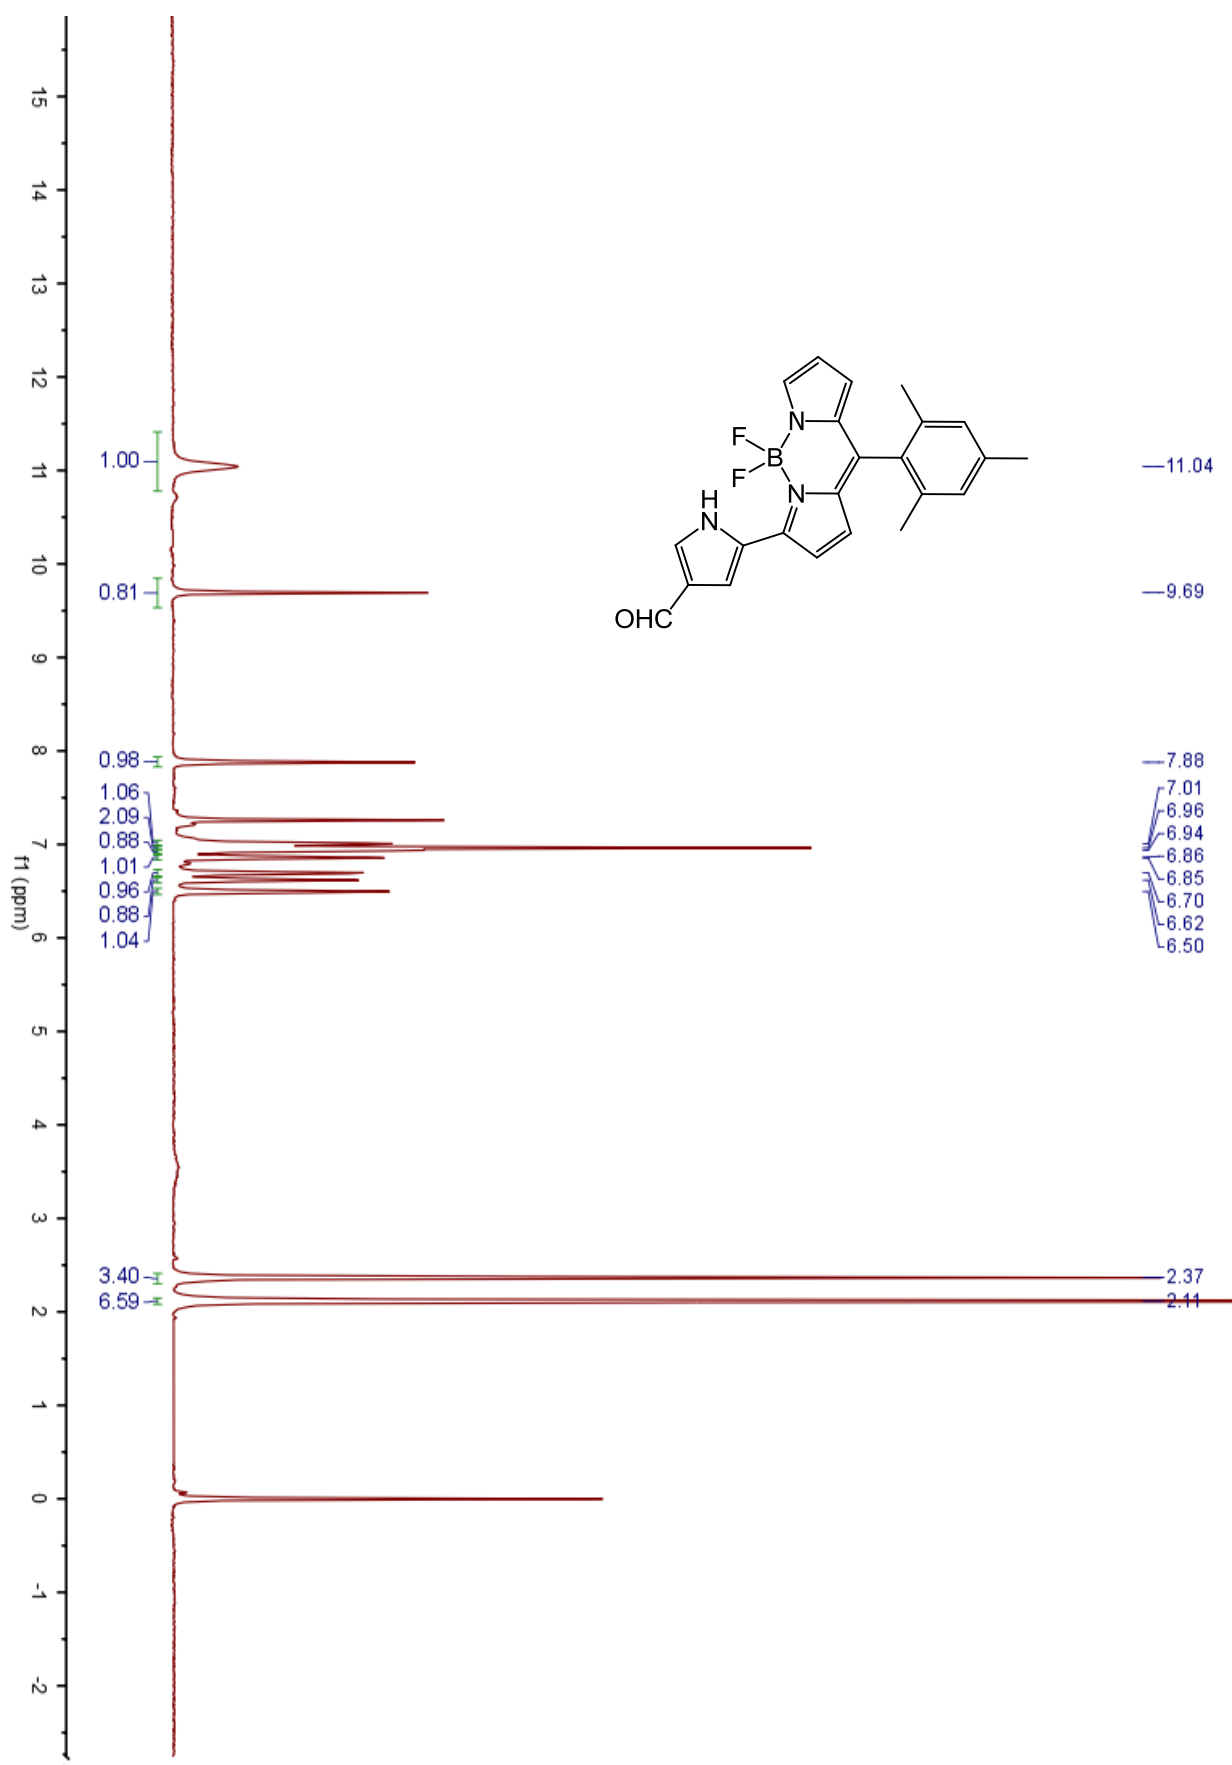

Figure S18. <sup>1</sup>H NMR spectrum of BODIPY dye **6** in CDCl<sub>3</sub> solution

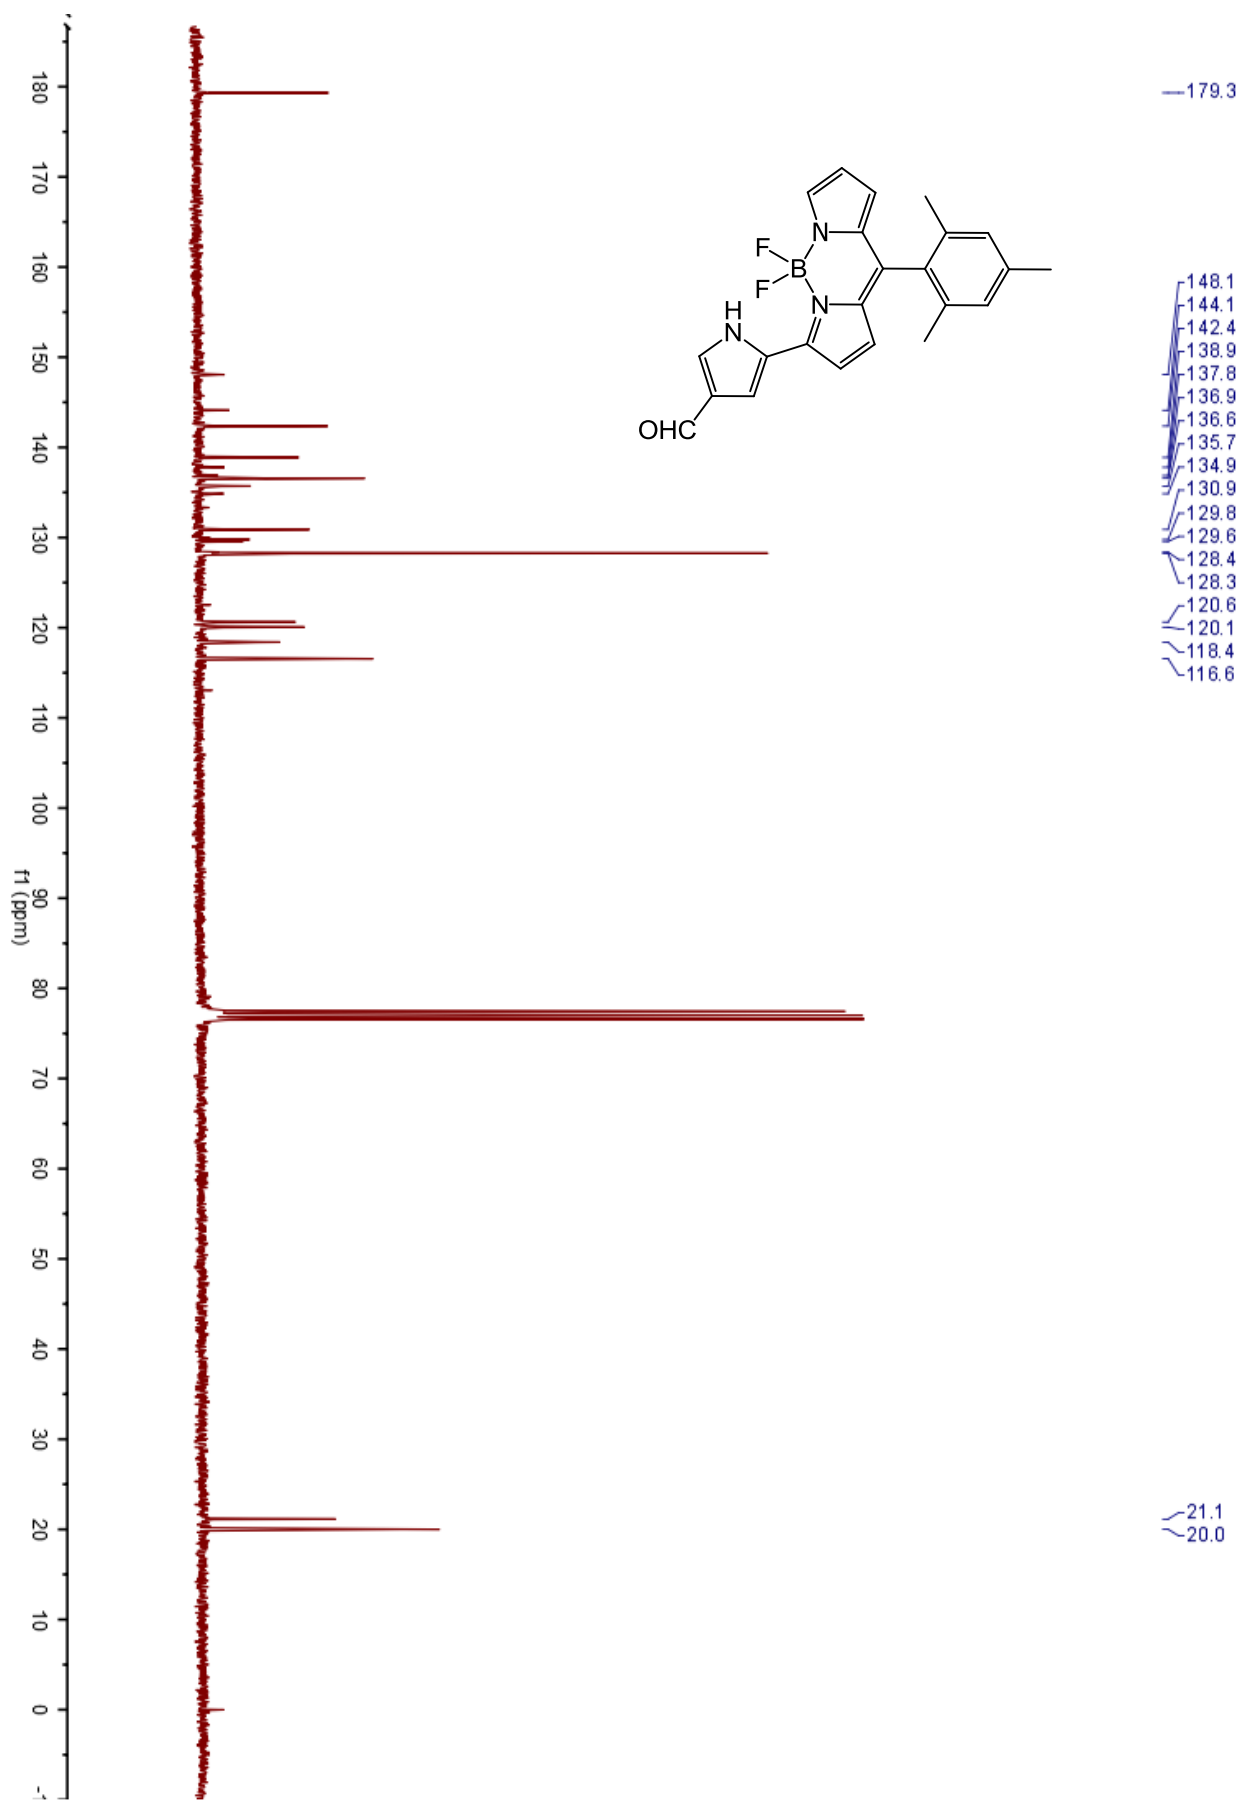

Figure S19.  $^{13}\text{C}$  NMR spectrum of BODIPY dye **6** in  $\text{CDCl}_3$  solution

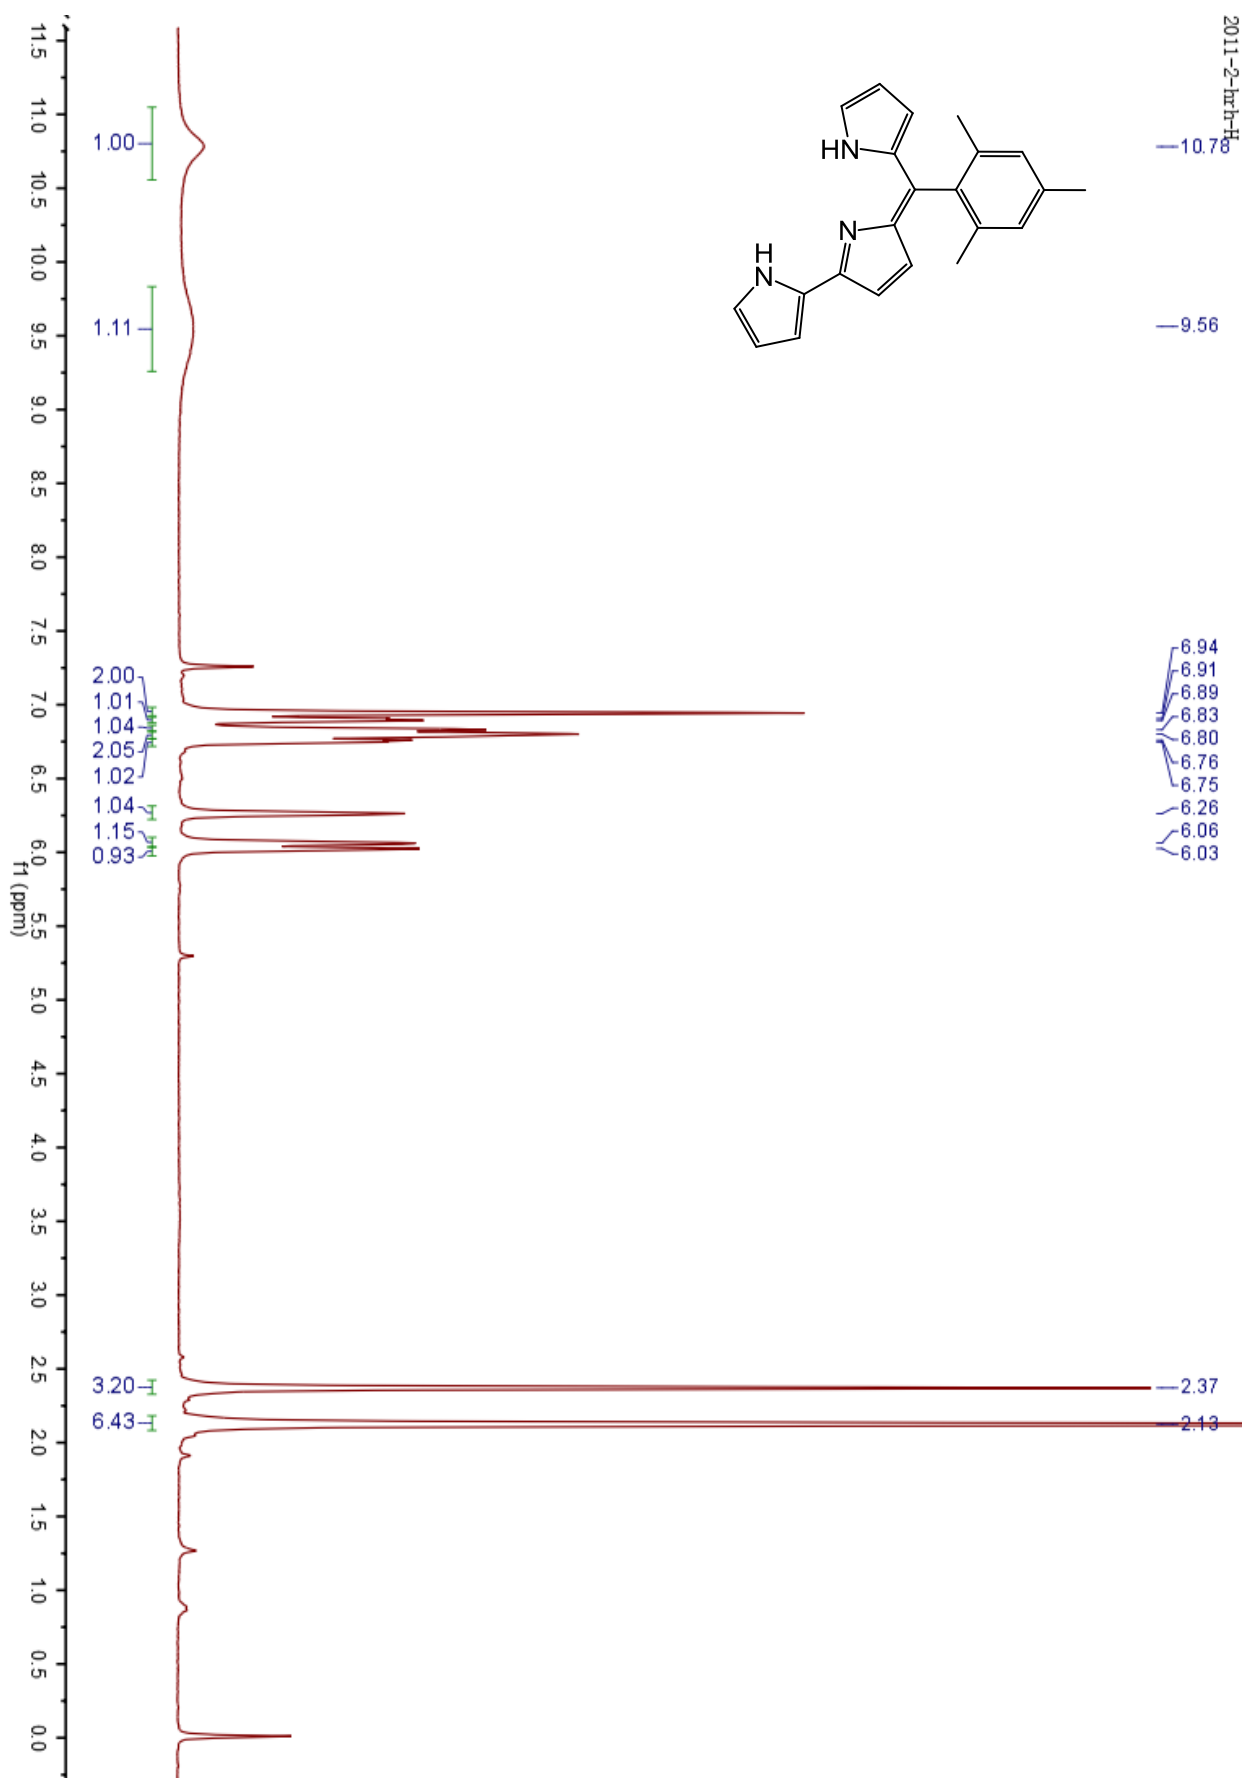

Figure S20. <sup>1</sup>H NMR spectrum of BODIPY dye 7 in CDCl<sub>3</sub> solution

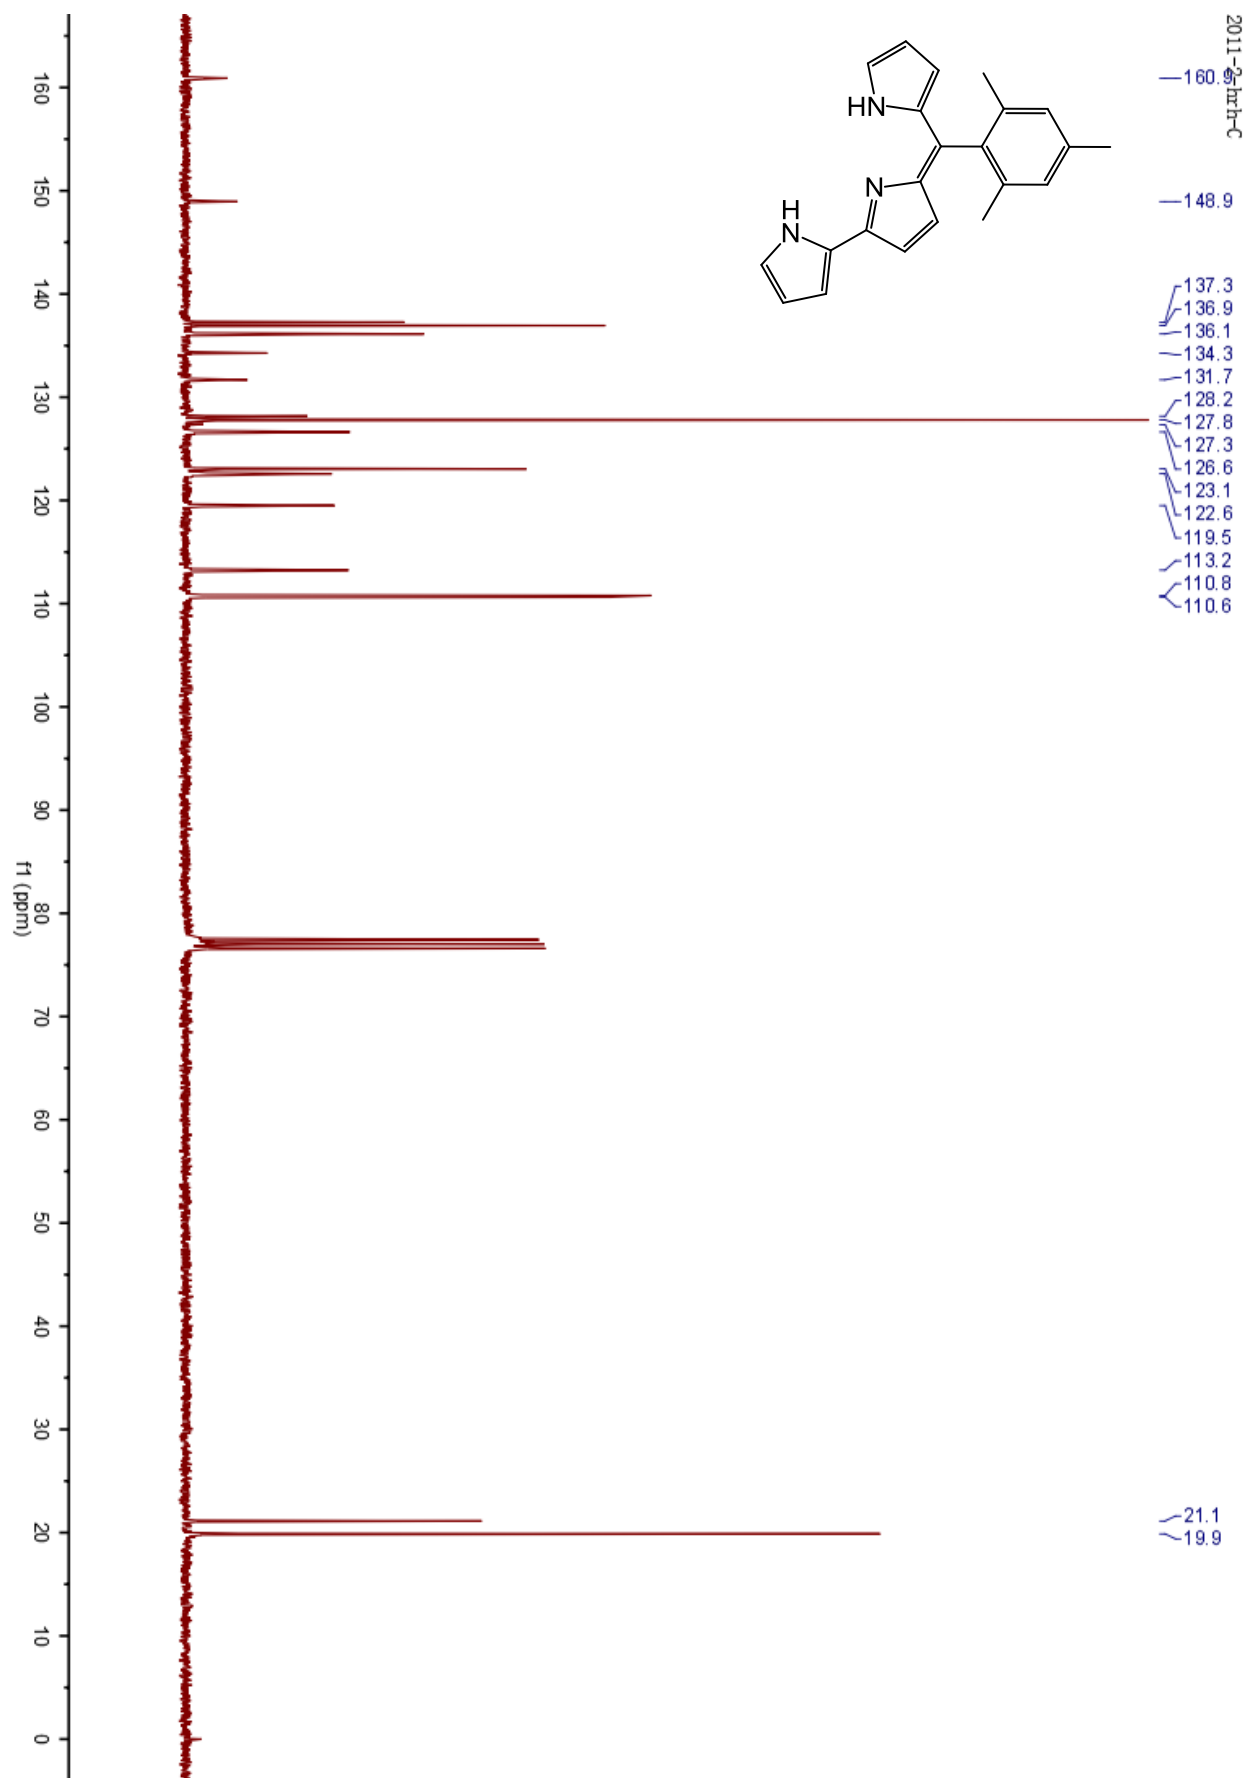

Figure S21.  $^{13}\text{C}$  NMR spectrum of BODIPY dye 7 in  $\text{CDCl}_3$  solution

### 3. High resolution mass spectroscopies for all new compounds

20110812\_APCI\_JLJ\_8\_110812142955

2011-8-12 14:29:55

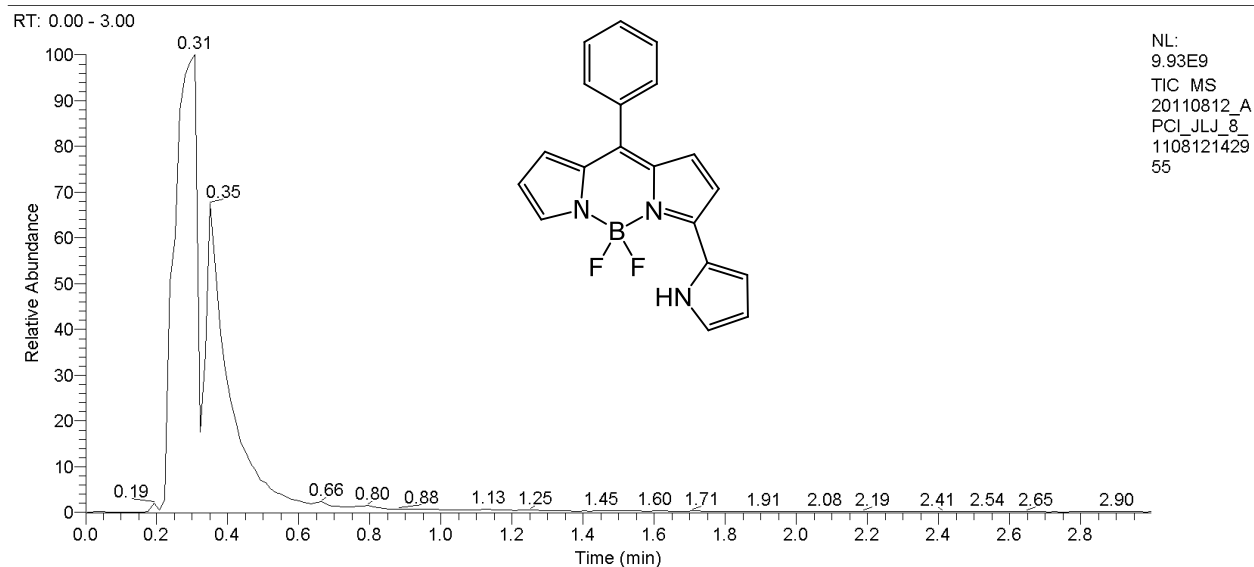

20110812\_APCI\_JLJ\_8\_110812142955#20 RT: 0.29 AV: 1 NL: 4.33E7  
 T: FTMS + c APCI corona Full ms [100.00-800.00]

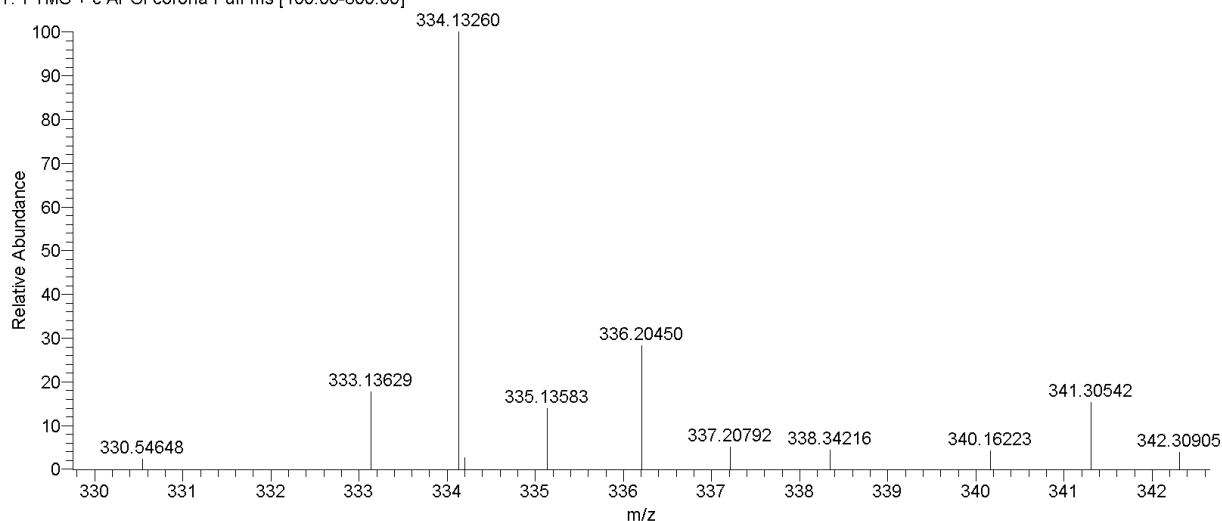

20110812\_APCI\_JLJ\_8\_110812142955#20 RT: 0.29  
 T: FTMS + c APCI corona Full ms [100.00-800.00]

| m/z       | Intensity  | Relative | Theo. Mass | Delta (mmu) | Composition                                                     |
|-----------|------------|----------|------------|-------------|-----------------------------------------------------------------|
| 333.13629 | 7715913.5  | 0.20     | 333.13691  | -0.62       | C <sub>20</sub> H <sub>16</sub> N <sub>2</sub> B F <sub>2</sub> |
| 334.13260 | 43326648.0 | 1.11     | 334.13216  | 0.44        | C <sub>19</sub> H <sub>15</sub> N <sub>3</sub> B F <sub>2</sub> |
| 334.19949 | 1175933.3  | 0.03     | 334.20091  | -1.42       | C <sub>16</sub> H <sub>23</sub> N <sub>5</sub> B F <sub>2</sub> |
| 335.13583 | 6008603.5  | 0.15     | 335.13999  | -4.15       | C <sub>19</sub> H <sub>16</sub> N <sub>3</sub> B F <sub>2</sub> |
| 336.20450 | 12272509.0 | 0.31     | 336.20398  | 0.52        | C <sub>15</sub> H <sub>23</sub> N <sub>6</sub> B F <sub>2</sub> |
| 337.20792 | 2225465.3  | 0.06     | 337.21181  | -3.89       | C <sub>15</sub> H <sub>24</sub> N <sub>6</sub> B F <sub>2</sub> |
| 338.34216 | 1880872.9  | 0.05     | 338.30096  | 41.21       | C <sub>13</sub> H <sub>35</sub> N <sub>7</sub> B F <sub>2</sub> |
| 340.16223 | 1846292.9  | 0.05     | 340.16654  | -4.30       | C <sub>18</sub> H <sub>19</sub> N <sub>4</sub> B F <sub>2</sub> |
| 341.30542 | 6645545.0  | 0.17     | 341.30599  | -0.57       | C <sub>20</sub> H <sub>38</sub> N B F <sub>2</sub>              |
| 342.30905 | 1717402.6  | 0.04     | 342.31381  | -4.76       | C <sub>20</sub> H <sub>39</sub> N B F <sub>2</sub>              |
| 345.14404 | 3169334.8  | 0.08     | 345.14278  | 1.26        | C <sub>13</sub> H <sub>14</sub> N <sub>9</sub> B F <sub>2</sub> |
| 346.09192 | 3134744.5  | 0.08     | 346.09443  | -2.51       | C <sub>17</sub> H <sub>9</sub> N <sub>6</sub> B F <sub>2</sub>  |
| 346.15268 | 6581354.0  | 0.17     | 346.15060  | 2.07        | C <sub>13</sub> H <sub>15</sub> N <sub>9</sub> B F <sub>2</sub> |



E:\data\20110812\20110812\_APCI\_JLJ\_9

2011-8-12 13:03:56

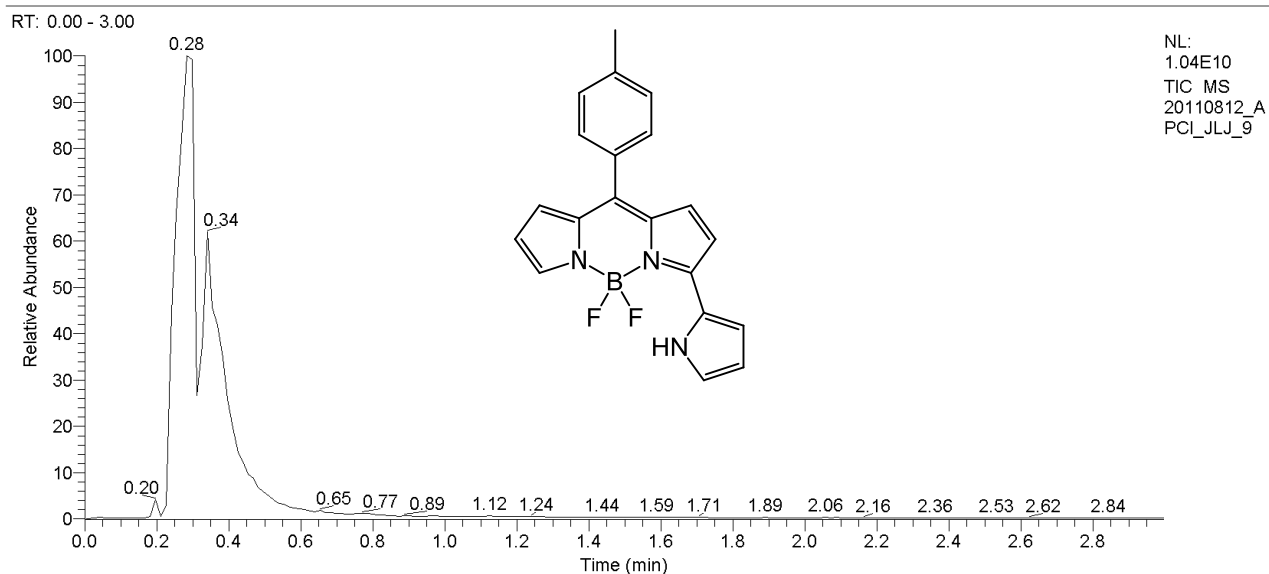

20110812\_APCI\_JLJ\_9 #18 RT: 0.26 AV: 1 NL: 1.44E8  
 T: FTMS + c APCI corona Full ms [100.00-800.00]

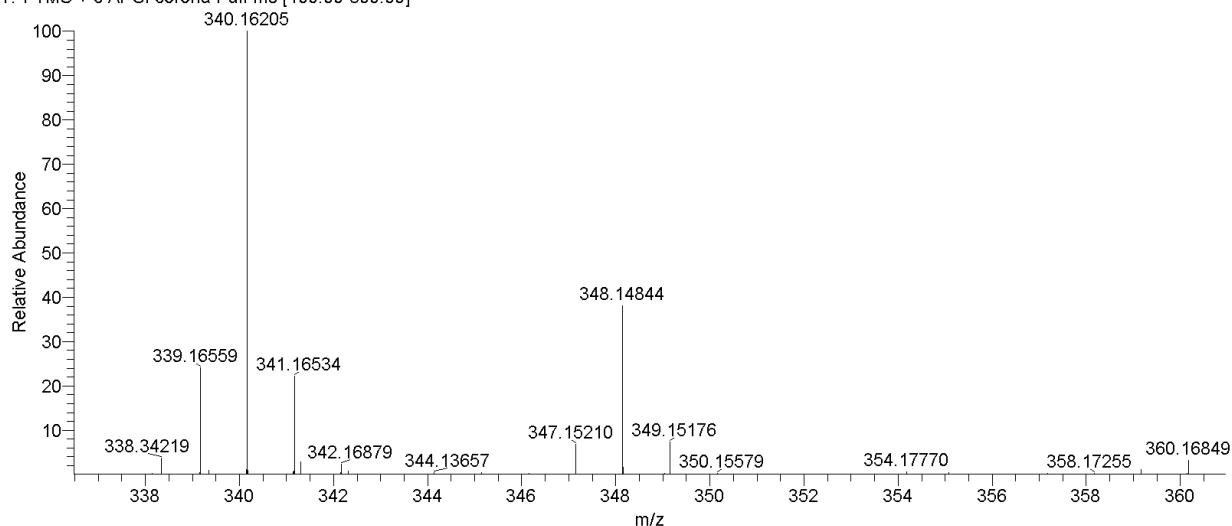

20110812\_APCI\_JLJ\_9 #18 RT: 0.26  
 T: FTMS + c APCI corona Full ms [100.00-800.00]

| m/z       | Intensity  | Relative | Theo. Mass | Delta (mmu) | Composition                                                                      |
|-----------|------------|----------|------------|-------------|----------------------------------------------------------------------------------|
| 347.15210 | 9852960.0  | 0.35     | 347.15256  | -0.46       | C <sub>21</sub> H <sub>18</sub> N <sub>2</sub> B F <sub>2</sub>                  |
| 348.14844 | 55039516.0 | 1.95     | 348.14781  | 0.63        | C <sub>20</sub> H <sub>17</sub> N <sub>3</sub> B F <sub>2</sub>                  |
| 348.15469 | 2428334.3  | 0.09     | 348.15551  | -0.82       | C <sub>11</sub> H <sub>20</sub> N <sub>8</sub> B Cl F <sub>2</sub>               |
| 349.15176 | 10634241.0 | 0.38     | 349.15144  | 0.32        | C <sub>20</sub> H <sub>23</sub> B <sup>37</sup> Cl F <sub>2</sub>                |
| 360.16849 | 4713010.0  | 0.17     | 360.16808  | 0.40        | C <sub>13</sub> H <sub>22</sub> N <sub>7</sub> B Cl F <sub>2</sub>               |
| 447.33340 | 2339721.8  | 0.08     | 447.33393  | -0.53       | C <sub>24</sub> H <sub>40</sub> N <sub>5</sub> B F <sub>2</sub>                  |
| 448.33035 | 10349053.0 | 0.37     | 448.33101  | -0.66       | C <sub>22</sub> H <sub>44</sub> N <sub>4</sub> B Cl F <sub>2</sub>               |
| 449.33359 | 2973291.5  | 0.11     | 449.33281  | 0.77        | C <sub>23</sub> H <sub>45</sub> N <sub>3</sub> B <sup>37</sup> Cl F <sub>2</sub> |
| 468.33682 | 4643372.0  | 0.16     | 468.33729  | -0.46       | C <sub>20</sub> H <sub>44</sub> N <sub>7</sub> B <sup>37</sup> Cl F <sub>2</sub> |
| 551.50470 | 3718662.0  | 0.13     | 551.47786  | 26.84       | C <sub>30</sub> H <sub>58</sub> N <sub>6</sub> B F <sub>2</sub>                  |
| 579.53589 | 16860522.0 | 0.60     | 579.48401  | 51.88       | C <sub>30</sub> H <sub>58</sub> N <sub>8</sub> B F <sub>2</sub>                  |
| 580.53918 | 5526243.0  | 0.20     | 580.49183  | 47.35       | C <sub>30</sub> H <sub>59</sub> N <sub>8</sub> B F <sub>2</sub>                  |
| 607.56738 | 11807922.0 | 0.42     | 607.49016  | 77.23       | C <sub>30</sub> H <sub>58</sub> N <sub>10</sub> B F <sub>2</sub>                 |

E:\data\20110812\20110812\_APCI\_JLJ\_10

2011-8-12 13:07:42

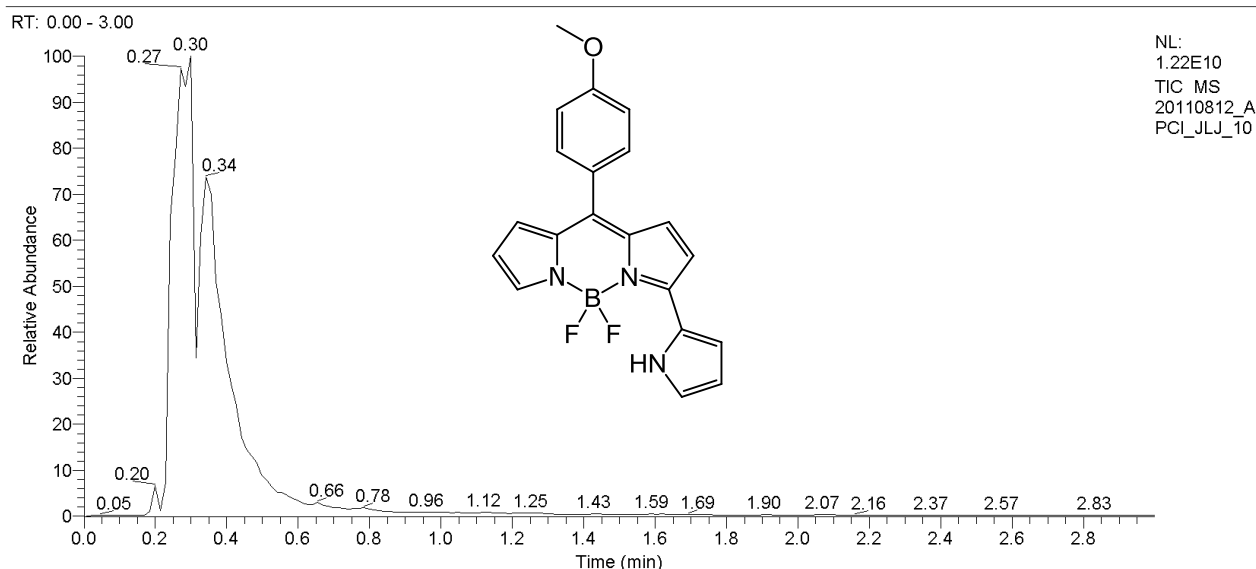

20110812\_APCI\_JLJ\_10 #18 RT: 0.26 AV: 1 NL: 2.23E8  
 T: FTMS + c APCI corona Full ms [100.00-800.00]

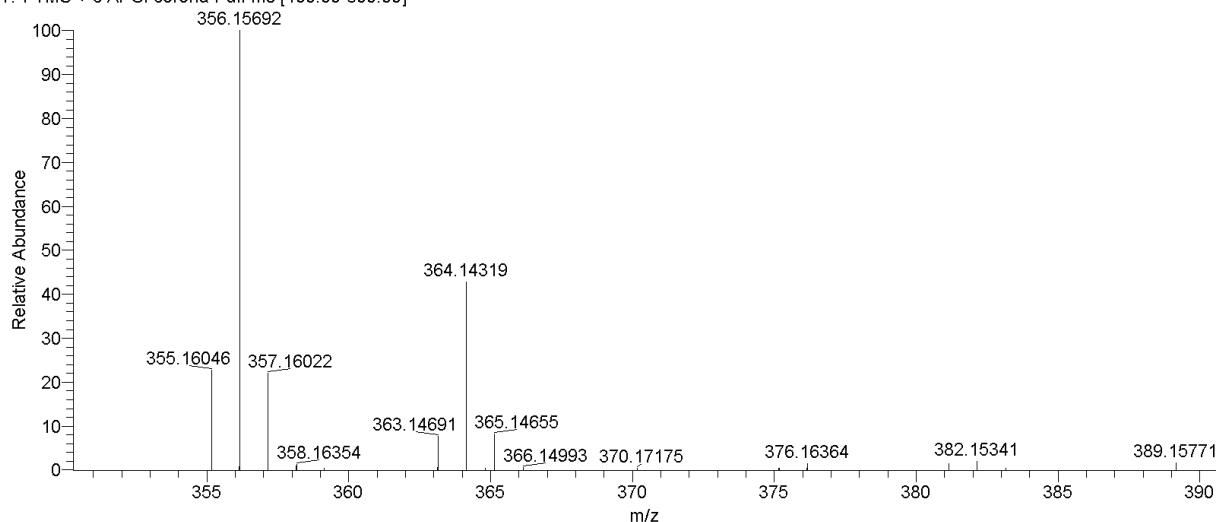

20110812\_APCI\_JLJ\_10 #18 RT: 0.26  
 T: FTMS + c APCI corona Full ms [100.00-800.00]

| m/z       | Intensity  | Relative | Theo. Mass | Delta (mmu) | Composition                                                       |
|-----------|------------|----------|------------|-------------|-------------------------------------------------------------------|
| 357.16022 | 49042756.0 | 1.20     | 357.16206  | -1.85       | C <sub>24</sub> H <sub>20</sub> B F <sub>2</sub>                  |
| 363.14691 | 17309240.0 | 0.42     | 363.14748  | -0.57       | C <sub>21</sub> H <sub>18</sub> ON <sub>2</sub> B F <sub>2</sub>  |
| 364.14319 | 95541792.0 | 2.34     | 364.14273  | 0.46        | C <sub>20</sub> H <sub>17</sub> ON <sub>3</sub> B F <sub>2</sub>  |
| 364.14978 | 4390581.5  | 0.11     | 364.14859  | 1.19        | C <sub>12</sub> H <sub>15</sub> ON <sub>10</sub> B F <sub>2</sub> |
| 365.14655 | 18386032.0 | 0.45     | 365.14921  | -2.66       | C <sub>18</sub> H <sub>16</sub> N <sub>6</sub> B F <sub>2</sub>   |
| 381.15689 | 3217123.5  | 0.08     | 381.15670  | 0.19        | C <sub>19</sub> H <sub>18</sub> ON <sub>5</sub> B F <sub>2</sub>  |
| 382.15341 | 4360755.0  | 0.11     | 382.15195  | 1.46        | C <sub>18</sub> H <sub>17</sub> ON <sub>6</sub> B F <sub>2</sub>  |
| 389.15771 | 3513491.5  | 0.09     | 389.15642  | 1.30        | C <sub>14</sub> H <sub>16</sub> ON <sub>10</sub> B F <sub>2</sub> |
| 409.16385 | 5107701.5  | 0.13     | 409.16285  | 1.00        | C <sub>19</sub> H <sub>18</sub> ON <sub>7</sub> B F <sub>2</sub>  |
| 464.19464 | 4550421.0  | 0.11     | 464.19247  | 2.17        | C <sub>21</sub> H <sub>21</sub> ON <sub>9</sub> B F <sub>2</sub>  |
| 551.50452 | 4992771.5  | 0.12     | 551.49765  | 6.87        | C <sub>25</sub> H <sub>60</sub> ON <sub>9</sub> B F <sub>2</sub>  |
| 579.53577 | 13956922.0 | 0.34     | 579.48401  | 51.76       | C <sub>30</sub> H <sub>58</sub> N <sub>8</sub> B F <sub>2</sub>   |
| 580.53864 | 7931231.5  | 0.19     | 580.49183  | 46.80       | C <sub>30</sub> H <sub>59</sub> N <sub>8</sub> B F <sub>2</sub>   |

E:\data\20110812\20110812\_APCI\_JLJ\_11

2011-8-12 13:11:28

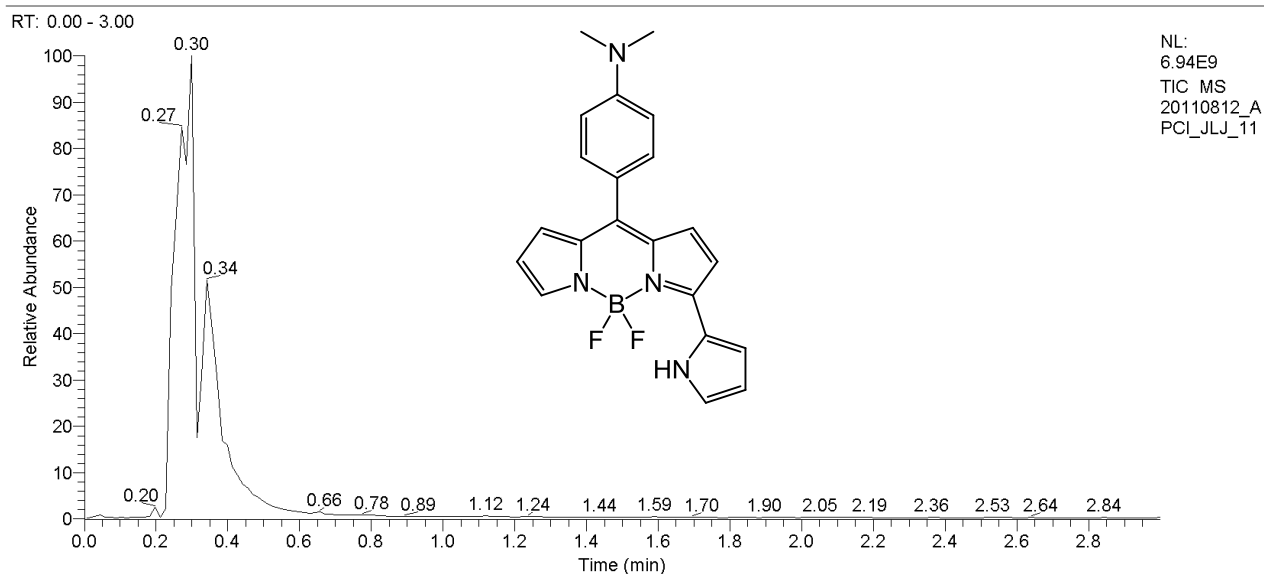

20110812\_APCI\_JLJ\_11 #19 RT: 0.27 AV: 1 NL: 1.60E8  
 T: FTMS + c APCI corona Full ms [100.00-800.00]

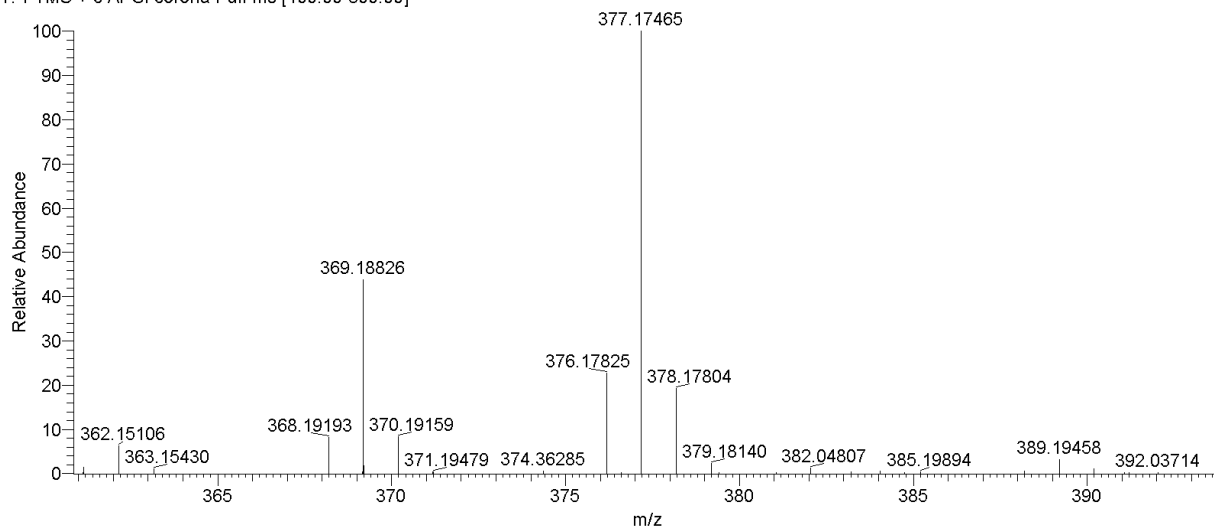

20110812\_APCI\_JLJ\_11 #32 RT: 0.46  
 T: FTMS + c APCI corona Full ms [100.00-800.00]

| m/z       | Intensity   | Relative | Theo. Mass | Delta (mmu) | Composition                                                      |
|-----------|-------------|----------|------------|-------------|------------------------------------------------------------------|
| 355.17273 | 9536859.0   | 5.12     | 355.17207  | 0.66        | C <sub>11</sub> H <sub>18</sub> ON <sub>10</sub> BF <sub>2</sub> |
| 356.17209 | 43249304.0  | 23.21    | 356.17268  | -0.59       | C <sub>17</sub> H <sub>19</sub> N <sub>6</sub> BF <sub>2</sub>   |
| 357.16833 | 186376256.0 | 100.00   | 357.16793  | 0.40        | C <sub>16</sub> H <sub>18</sub> N <sub>7</sub> BF <sub>2</sub>   |
| 358.17136 | 41370000.0  | 22.20    | 358.16989  | 1.47        | C <sub>24</sub> H <sub>21</sub> BF <sub>2</sub>                  |
| 369.18790 | 5700902.5   | 3.06     | 369.18772  | 0.18        | C <sub>12</sub> H <sub>20</sub> ON <sub>10</sub> BF <sub>2</sub> |
| 377.17429 | 10598561.0  | 5.69     | 377.17436  | -0.07       | C <sub>21</sub> H <sub>20</sub> N <sub>4</sub> BF <sub>2</sub>   |
| 579.53461 | 6136140.5   | 3.29     | 579.48401  | 50.60       | C <sub>30</sub> H <sub>58</sub> N <sub>8</sub> BF <sub>2</sub>   |
| 607.56592 | 5534480.5   | 2.97     | 607.49016  | 75.76       | C <sub>30</sub> H <sub>58</sub> N <sub>10</sub> BF <sub>2</sub>  |

E:\data\20110812\20110812\_APCI\_JLJ\_13

2011-8-12 13:18:57

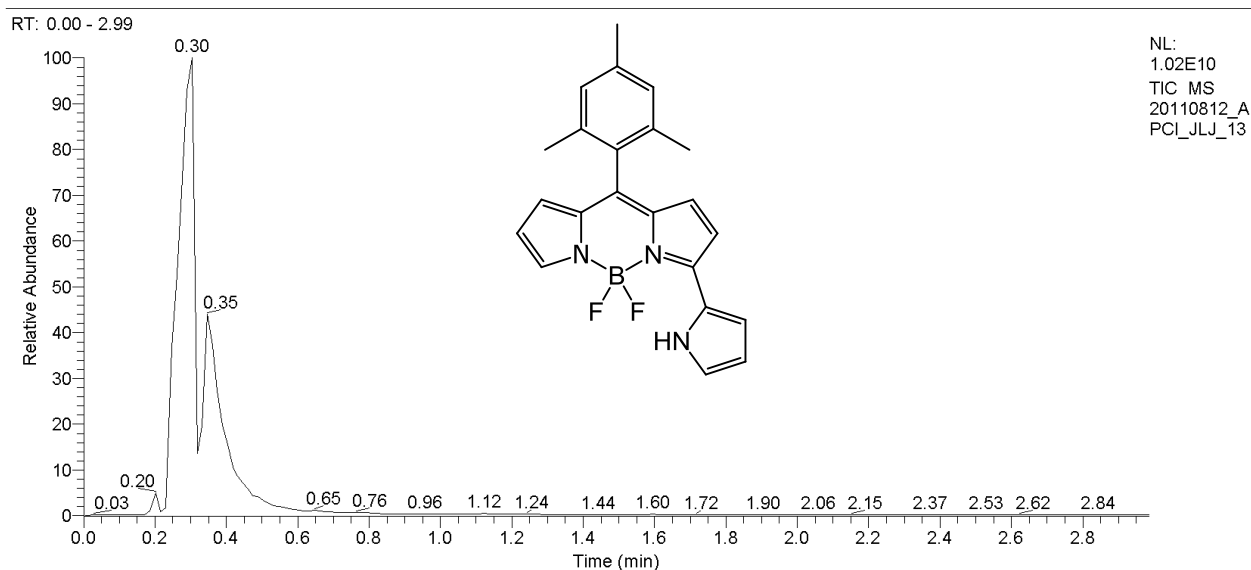

20110812\_APCI\_JLJ\_13 #19 RT: 0.28 AV: 1 NL: 1.84E8  
 T: FTMS + c APCI corona Full ms [100.00-800.00]

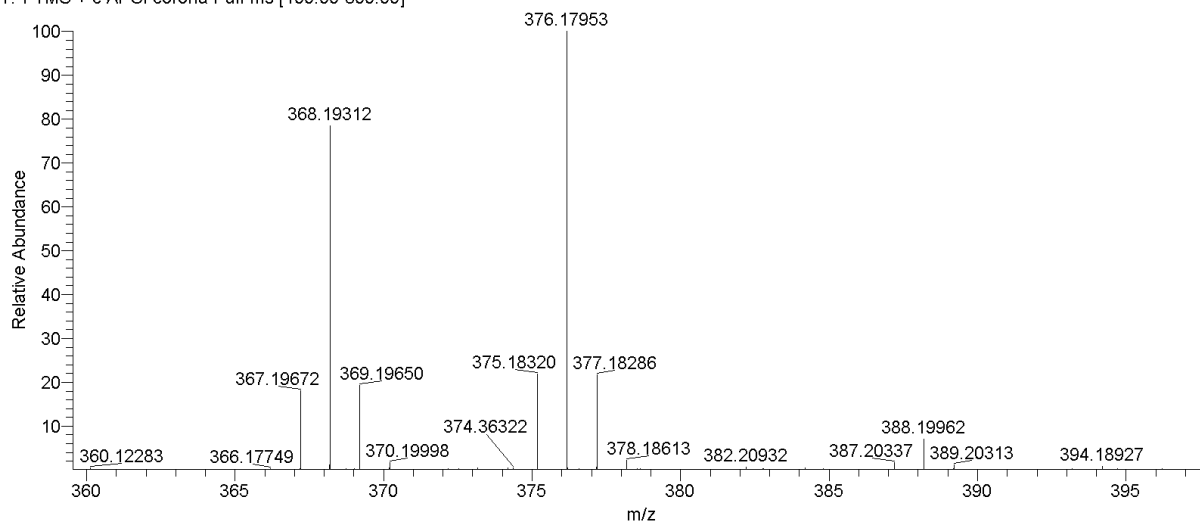

20110812\_APCI\_JLJ\_13#32 RT: 0.46  
 T: FTMS + c APCI corona Full ms [100.00-800.00]

| m/z       | Intensity   | Relative | Theo. Mass | Delta (mmu) | Composition                                                      |
|-----------|-------------|----------|------------|-------------|------------------------------------------------------------------|
| 354.17776 | 17713906.0  | 6.35     | 354.17682  | 0.95        | C <sub>12</sub> H <sub>19</sub> ON <sub>9</sub> B F <sub>2</sub> |
| 355.17715 | 66948380.0  | 24.01    | 355.17743  | -0.28       | C <sub>18</sub> H <sub>20</sub> N <sub>5</sub> B F <sub>2</sub>  |
| 356.17334 | 278829120.0 | 100.00   | 356.17268  | 0.66        | C <sub>17</sub> H <sub>19</sub> N <sub>6</sub> B F <sub>2</sub>  |
| 357.17636 | 63413432.0  | 22.74    | 357.18051  | -4.15       | C <sub>17</sub> H <sub>20</sub> N <sub>6</sub> B F <sub>2</sub>  |
| 358.17963 | 6736812.5   | 2.42     | 358.17710  | 2.53        | C <sub>18</sub> H <sub>21</sub> ON <sub>4</sub> B F <sub>2</sub> |
| 368.19287 | 11945678.0  | 4.28     | 368.19247  | 0.40        | C <sub>13</sub> H <sub>21</sub> ON <sub>9</sub> B F <sub>2</sub> |
| 376.17923 | 11848446.0  | 4.25     | 376.17911  | 0.12        | C <sub>22</sub> H <sub>21</sub> N <sub>3</sub> B F <sub>2</sub>  |

E:\data\20110812\20110812\_APCI\_JLJ\_14

2011-8-12 13:22:41

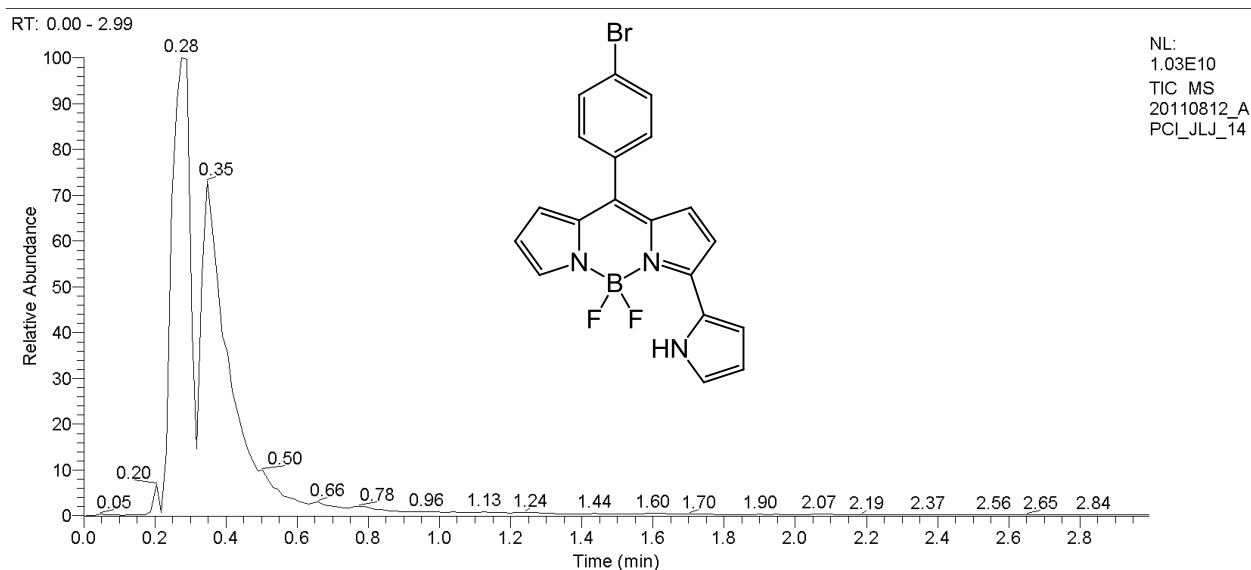

20110812\_APCI\_JLJ\_14 #18 RT: 0.26 AV: 1 NL: 1.07E8  
 T: FTMS + c APCI corona Full ms [100.00-800.00]

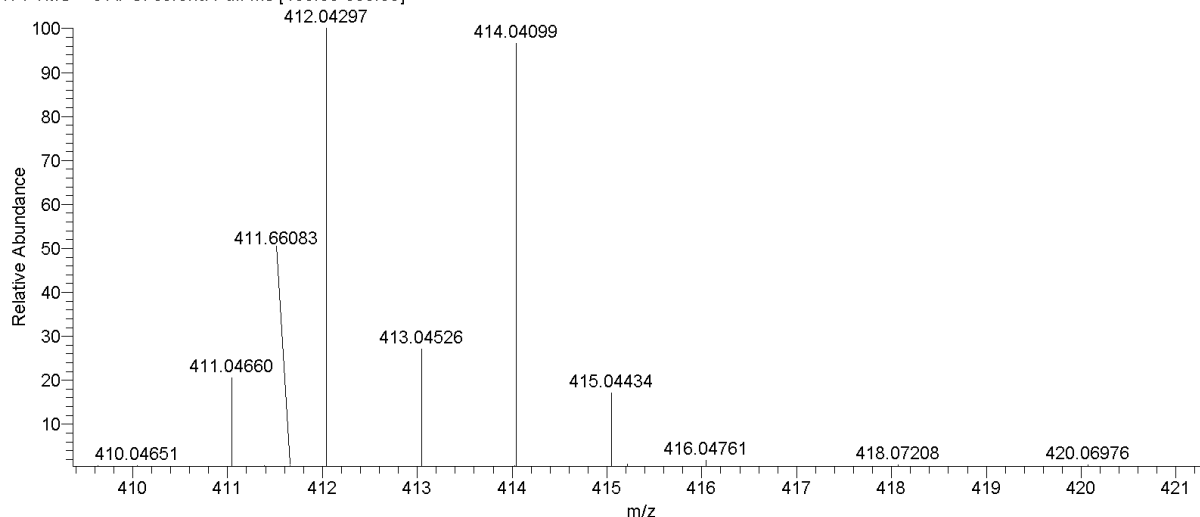

20110812\_APCI\_JLJ\_14#18 RT: 0.26  
 T: FTMS + c APCI corona Full ms [100.00-800.00]

| m/z       | Intensity   | Relative | Theo. Mass | Delta (mmu) | Composition                                                                       |
|-----------|-------------|----------|------------|-------------|-----------------------------------------------------------------------------------|
| 406.05460 | 137501168.0 | 5.88     | 406.05454  | 0.05        | C <sub>13</sub> H <sub>27</sub> N <sub>3</sub> BBr <sup>81</sup> BrF <sub>2</sub> |
| 407.05786 | 25009072.0  | 1.07     | 407.05866  | -0.80       | C <sub>27</sub> H <sub>6</sub> N <sub>2</sub> BF <sub>2</sub>                     |
| 411.04660 | 22065392.0  | 0.94     | 411.04687  | -0.27       | C <sub>17</sub> H <sub>2</sub> ON <sub>10</sub> BF <sub>2</sub>                   |
| 412.04297 | 107291080.0 | 4.59     | 412.04267  | 0.30        | C <sub>19</sub> H <sub>14</sub> N <sub>3</sub> BBrF <sub>2</sub>                  |
| 413.04526 | 29085526.0  | 1.24     | 413.04538  | -0.12       | C <sub>20</sub> H <sub>15</sub> N <sub>2</sub> B <sup>81</sup> BrF <sub>2</sub>   |
| 414.04099 | 103621720.0 | 4.43     | 414.04063  | 0.36        | C <sub>19</sub> H <sub>14</sub> N <sub>3</sub> B <sup>81</sup> BrF <sub>2</sub>   |
| 415.04434 | 18327634.0  | 0.78     | 415.04364  | 0.70        | C <sub>15</sub> H <sub>26</sub> BBr <sup>81</sup> BrF <sub>2</sub>                |
| 424.06308 | 4549271.5   | 0.19     | 424.06271  | 0.37        | C <sub>23</sub> H <sub>18</sub> B <sup>81</sup> BrF <sub>2</sub>                  |
| 426.06073 | 3692747.8   | 0.16     | 426.06041  | 0.32        | C <sub>15</sub> H <sub>16</sub> ON <sub>6</sub> B <sup>81</sup> BrF <sub>2</sub>  |
| 430.05307 | 3987565.5   | 0.17     | 430.05324  | -0.17       | C <sub>19</sub> H <sub>16</sub> ON <sub>3</sub> BBrF <sub>2</sub>                 |
| 457.06329 | 3325009.5   | 0.14     | 457.06279  | 0.50        | C <sub>18</sub> H <sub>15</sub> N <sub>7</sub> BBrF <sub>2</sub>                  |
| 551.50330 | 4572049.5   | 0.20     | 551.49765  | 5.65        | C <sub>25</sub> H <sub>60</sub> ON <sub>9</sub> BF <sub>2</sub>                   |
| 579.53534 | 19053504.0  | 0.82     | 579.48401  | 51.33       | C <sub>30</sub> H <sub>58</sub> N <sub>8</sub> BF <sub>2</sub>                    |

20110812\_APCI\_JLJ\_12\_110812143513

2011-8-12 14:35:13

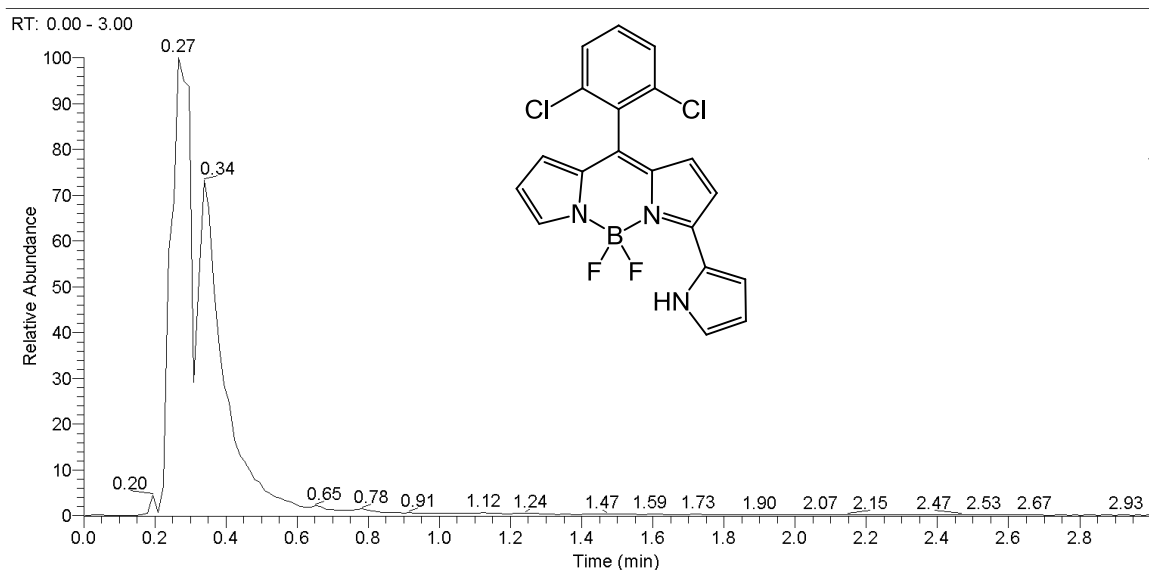

20110812\_APCI\_JLJ\_12\_110812143513 #12 RT: 0.18 AV: 1 NL: 4.49E5  
 T: FTMS + c APCI corona Full ms [100.00-800.00]

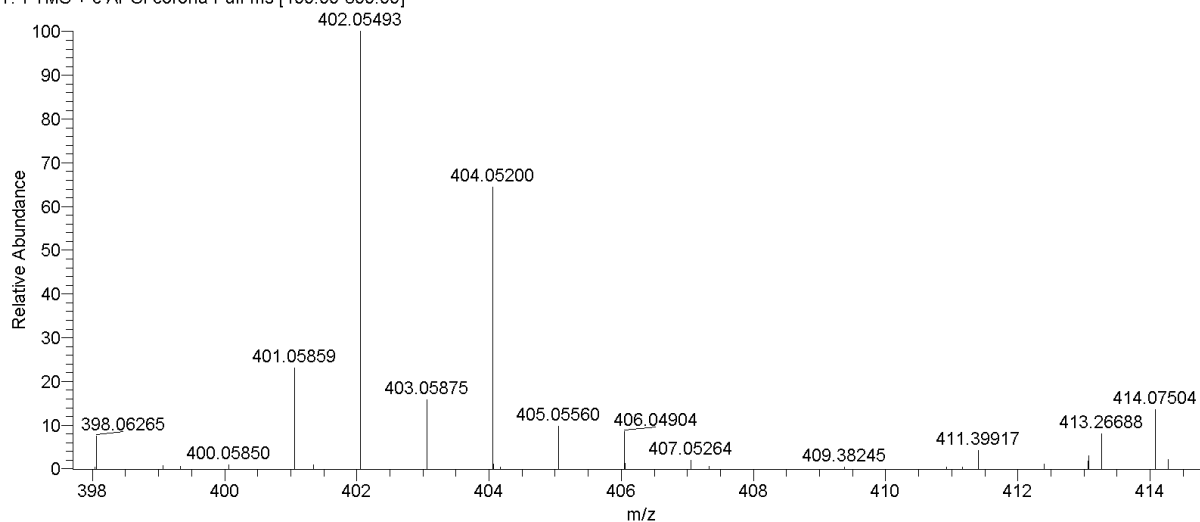

20110812\_APCI\_JLJ\_12\_110812143513 #12 RT: 0.18  
 T: FTMS + c APCI corona Full ms [100.00-800.00]

| m/z       | Intensity | Relative | Theo. Mass | Delta (mmu) | Composition                                                                                                   |
|-----------|-----------|----------|------------|-------------|---------------------------------------------------------------------------------------------------------------|
| 401.34171 | 3946.2    | 0.05     | 401.33701  | 4.70        | C <sub>19</sub> H <sub>40</sub> N <sub>6</sub> B F <sub>2</sub>                                               |
| 402.05493 | 449063.5  | 5.14     | 402.05422  | 0.72        | C <sub>19</sub> H <sub>13</sub> N <sub>3</sub> B Cl <sub>2</sub> F <sub>2</sub>                               |
| 403.05875 | 71229.4   | 0.82     | 403.05952  | -0.77       | C <sub>11</sub> H <sub>22</sub> N <sub>4</sub> B Cl <sub>2</sub> <sup>37</sup> Cl <sub>2</sub> F <sub>2</sub> |
| 404.05200 | 289416.0  | 3.31     | 404.05127  | 0.74        | C <sub>19</sub> H <sub>13</sub> N <sub>3</sub> B Cl <sup>37</sup> Cl F <sub>2</sub>                           |
| 404.06348 | 4765.8    | 0.05     | 404.06369  | -0.21       | C <sub>13</sub> H <sub>13</sub> N <sub>8</sub> B <sup>37</sup> Cl <sub>2</sub> F <sub>2</sub>                 |
| 405.05560 | 43953.4   | 0.50     | 405.05490  | 0.71        | C <sub>19</sub> H <sub>19</sub> B Cl <sup>37</sup> Cl <sub>2</sub> F <sub>2</sub>                             |
| 406.04904 | 38352.2   | 0.44     | 406.04946  | -0.42       | C <sub>8</sub> H <sub>14</sub> N <sub>10</sub> B Cl <sub>2</sub> <sup>37</sup> Cl F <sub>2</sub>              |
| 406.05923 | 5725.5    | 0.07     | 406.05853  | 0.70        | C <sub>18</sub> H <sub>8</sub> N <sub>7</sub> B Cl F <sub>2</sub>                                             |
| 407.05264 | 8902.0    | 0.10     | 407.05309  | -0.45       | C <sub>8</sub> H <sub>20</sub> N <sub>7</sub> B Cl <sub>2</sub> <sup>37</sup> Cl <sub>2</sub> F <sub>2</sub>  |
| 411.39917 | 18968.8   | 0.22     | 411.36495  | 34.22       | C <sub>15</sub> H <sub>42</sub> N <sub>10</sub> B F <sub>2</sub>                                              |
| 412.40274 | 4697.0    | 0.05     | 412.31844  | 84.30       | C <sub>18</sub> H <sub>42</sub> N <sub>5</sub> B Cl F <sub>2</sub>                                            |
| 413.06726 | 7799.7    | 0.09     | 413.06719  | 0.07        | C <sub>15</sub> H <sub>19</sub> N <sub>4</sub> B Cl <sup>37</sup> Cl <sub>2</sub> F <sub>2</sub>              |
| 413.07858 | 13508.2   | 0.15     | 413.07794  | 0.64        | C <sub>17</sub> H <sub>16</sub> N <sub>5</sub> B <sup>37</sup> Cl <sub>2</sub> F <sub>2</sub>                 |

E:\data\20110812\20110812\_APCI\_JLJ\_2

2011-8-12 12:37:54

RT: 0.00 - 3.00

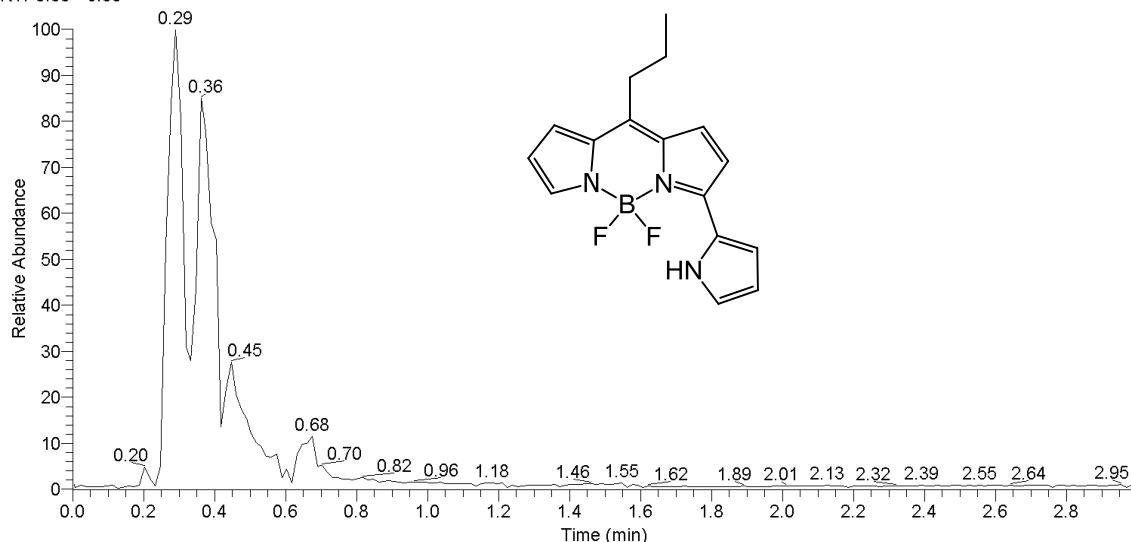

NL:  
 8.57E9  
 TIC MS  
 20110812\_A  
 PCI\_JLJ\_2

20110812\_APCI\_JLJ\_2#20 RT: 0.28 AV: 1 NL: 1.55E8  
 T: FTMS + c APCI corona Full ms [100.00-800.00]

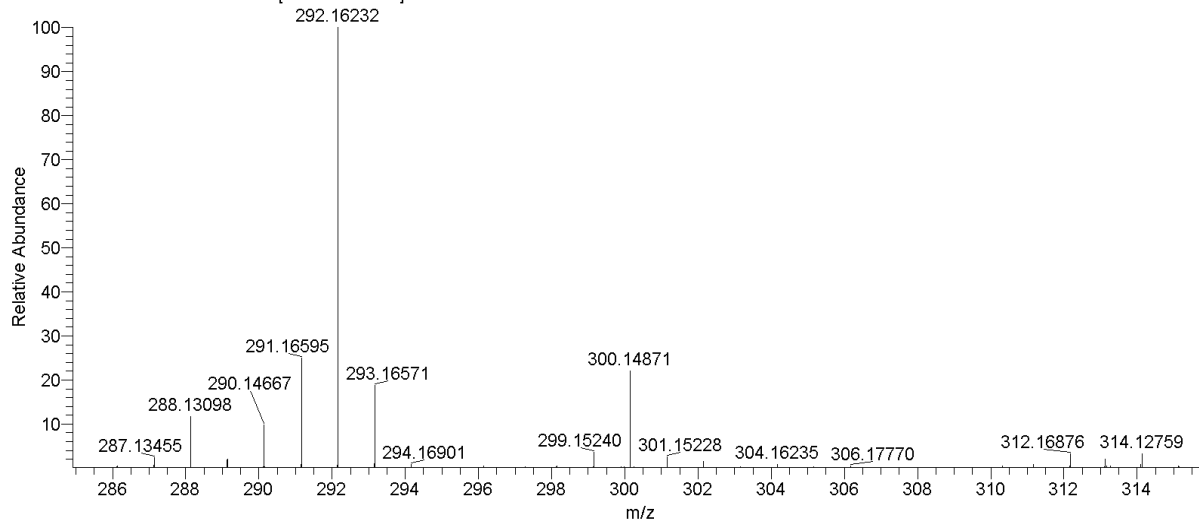

20110812\_APCI\_JLJ\_2#20 RT: 0.28

T: FTMS + c APCI corona Full ms [100.00-800.00]

| m/z       | Intensity   | Relative | Theo. Mass | Delta (mmu) | Composition                                                      |
|-----------|-------------|----------|------------|-------------|------------------------------------------------------------------|
| 292.16232 | 155280976.0 | 6.72     | 292.16654  | -4.21       | C <sub>14</sub> H <sub>19</sub> N <sub>4</sub> B F <sub>2</sub>  |
| 292.16861 | 6068174.0   | 0.26     | 292.16654  | 2.07        | C <sub>14</sub> H <sub>19</sub> N <sub>4</sub> B F <sub>2</sub>  |
| 293.16571 | 29188022.0  | 1.26     | 293.16178  | 3.93        | C <sub>13</sub> H <sub>18</sub> N <sub>5</sub> B F <sub>2</sub>  |
| 299.15240 | 5688538.5   | 0.25     | 299.15843  | -6.03       | C <sub>9</sub> H <sub>16</sub> N <sub>9</sub> B F <sub>2</sub>   |
| 300.14871 | 34242248.0  | 1.48     | 300.14781  | 0.90        | C <sub>16</sub> H <sub>17</sub> N <sub>3</sub> B F <sub>2</sub>  |
| 312.16876 | 4958324.0   | 0.21     | 312.16626  | 2.51        | C <sub>10</sub> H <sub>17</sub> N <sub>9</sub> B F <sub>2</sub>  |
| 314.12759 | 5109665.5   | 0.22     | 314.12573  | 1.86        | C <sub>14</sub> H <sub>13</sub> N <sub>6</sub> B F <sub>2</sub>  |
| 509.24442 | 4411931.0   | 0.19     | 509.24311  | 1.31        | C <sub>29</sub> H <sub>28</sub> N <sub>6</sub> B F <sub>2</sub>  |
| 532.24792 | 10341207.0  | 0.45     | 532.22271  | 25.22       | C <sub>30</sub> H <sub>25</sub> N <sub>7</sub> B F <sub>2</sub>  |
| 533.24438 | 23853666.0  | 1.03     | 533.23053  | 13.85       | C <sub>30</sub> H <sub>26</sub> N <sub>7</sub> B F <sub>2</sub>  |
| 533.26733 | 7749823.5   | 0.34     | 533.28670  | -19.37      | C <sub>26</sub> H <sub>32</sub> N <sub>10</sub> B F <sub>2</sub> |
| 534.24744 | 6750095.0   | 0.29     | 534.23836  | 9.08        | C <sub>30</sub> H <sub>27</sub> N <sub>7</sub> B F <sub>2</sub>  |
| 534.26343 | 76023976.0  | 3.29     | 534.23836  | 25.07       | C <sub>30</sub> H <sub>27</sub> N <sub>7</sub> B F <sub>2</sub>  |

4. UV-vis and Fluorescence data for all the new compounds (THF: Tetrahydrofuran; DCM: Dichloromethane).

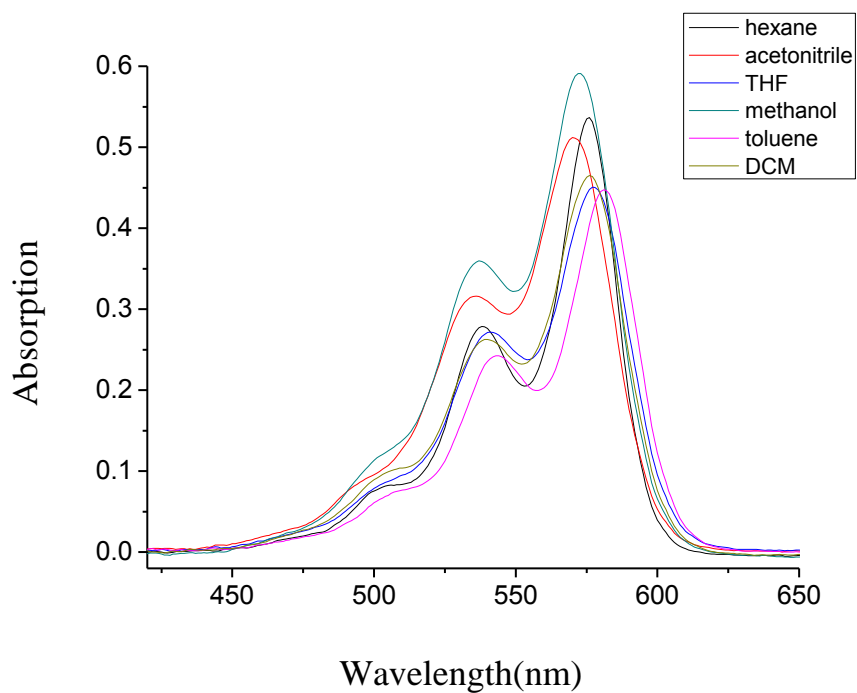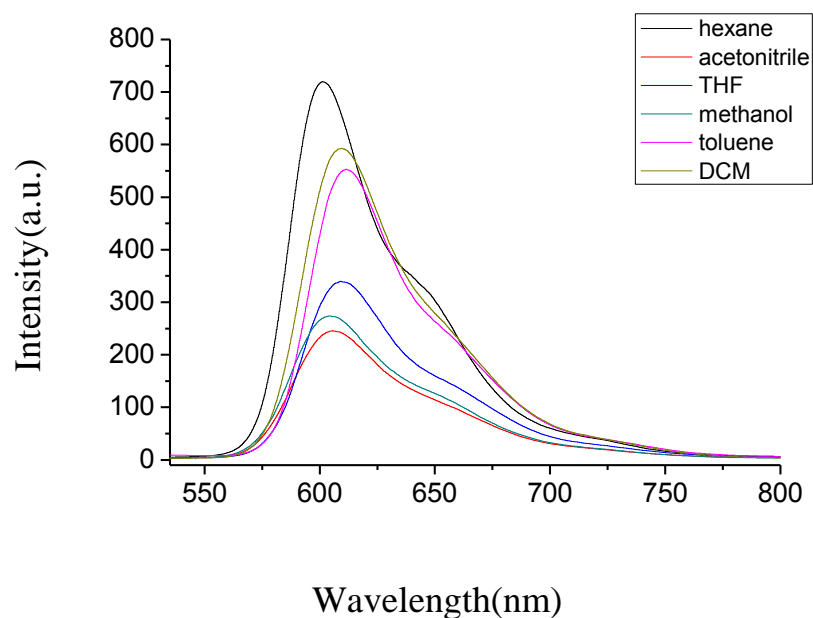

**Figure S22:** Absorption (top) and emission spectra (bottom) of BODIPY **1a** recorded in different solvents. Excited at 520 nm



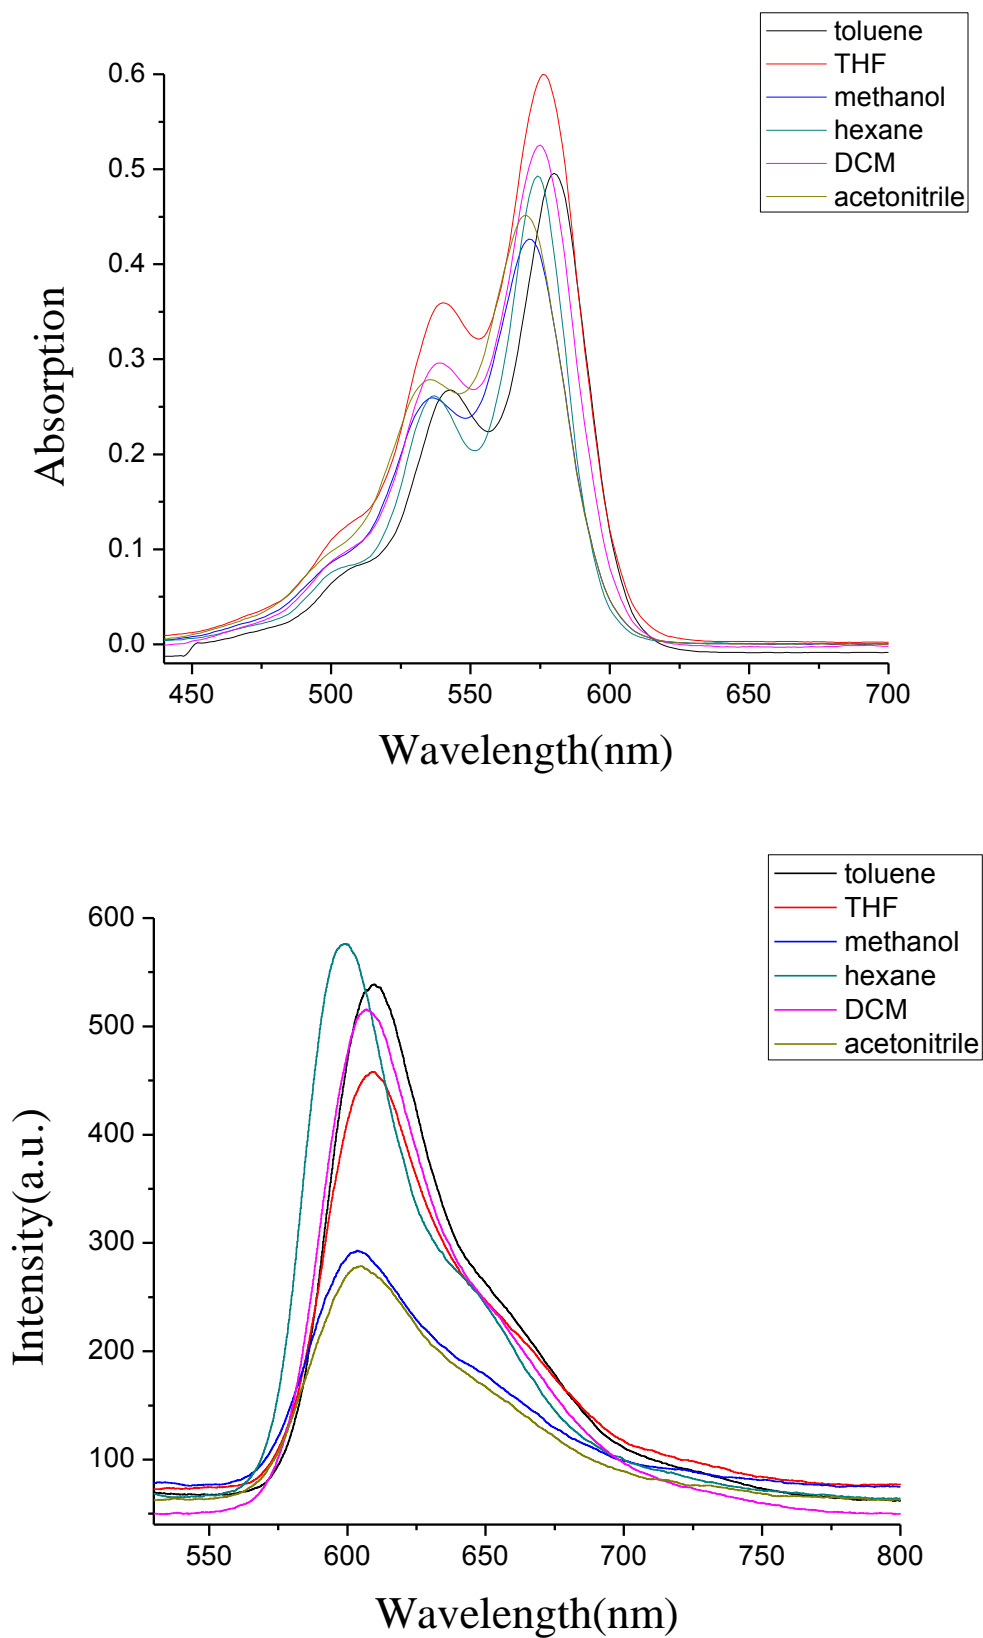

**Figure S23:** Absorption (top) and emission spectra (bottom) of BODIPY **1b** recorded in different solvents. Excited at 520 nm

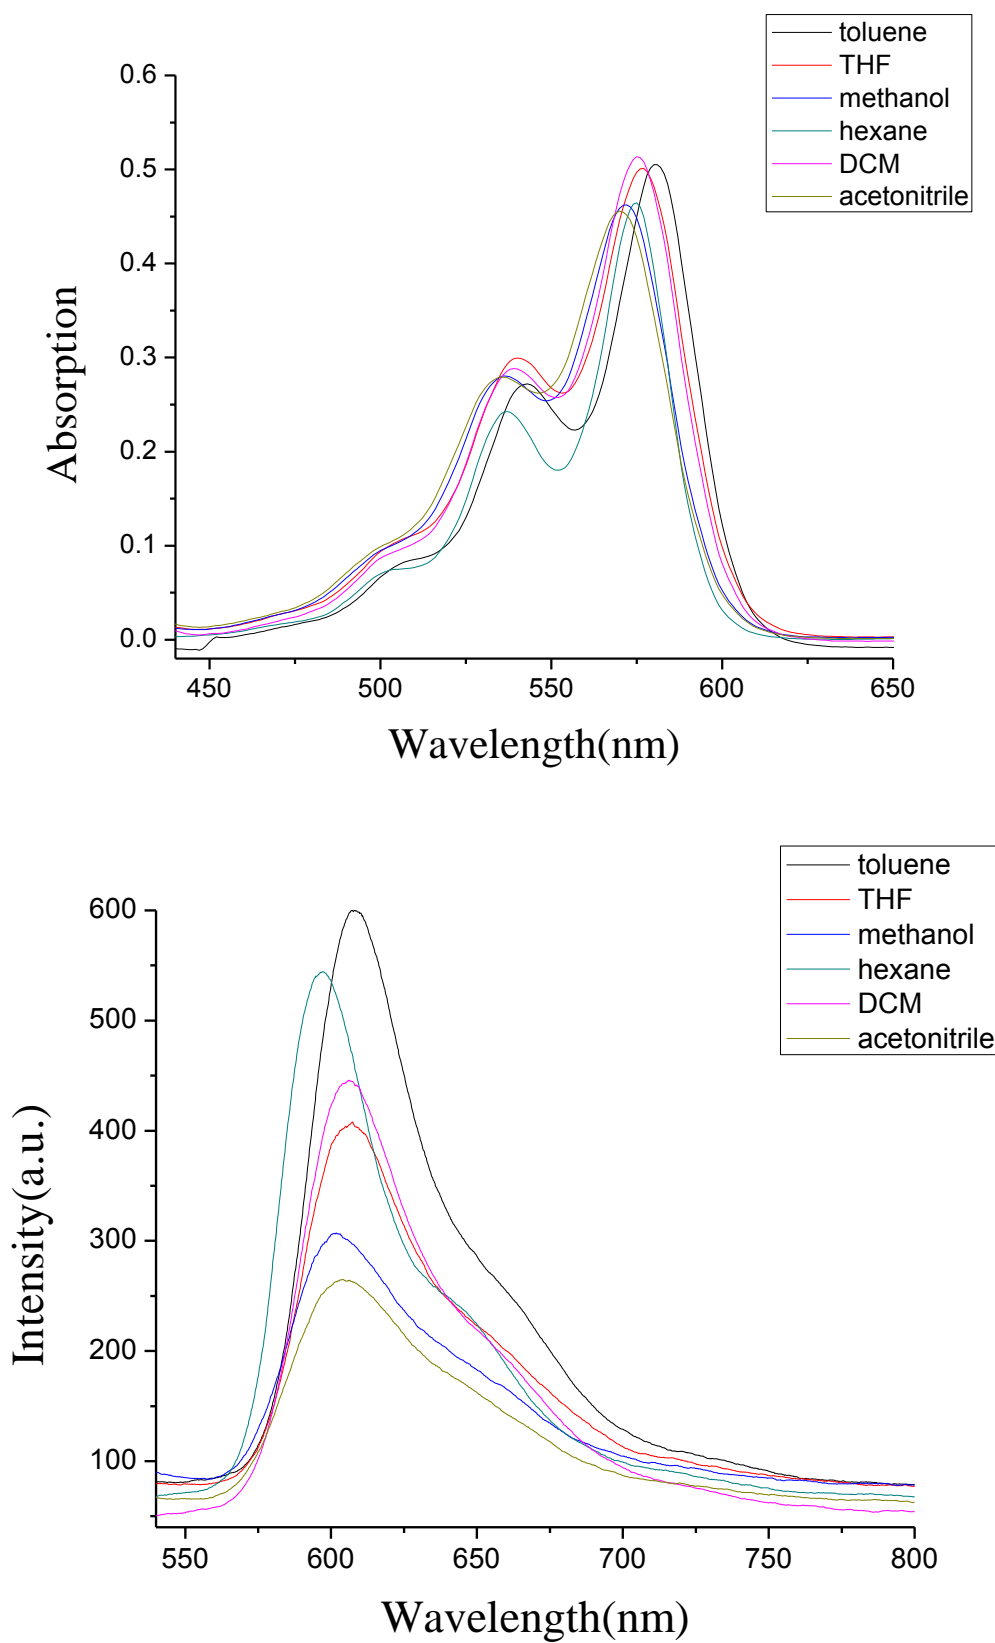

**Figure S24:** Absorption (top) and emission spectra (bottom) of BODIPY **1c** recorded in different solvents. Excited at 520 nm

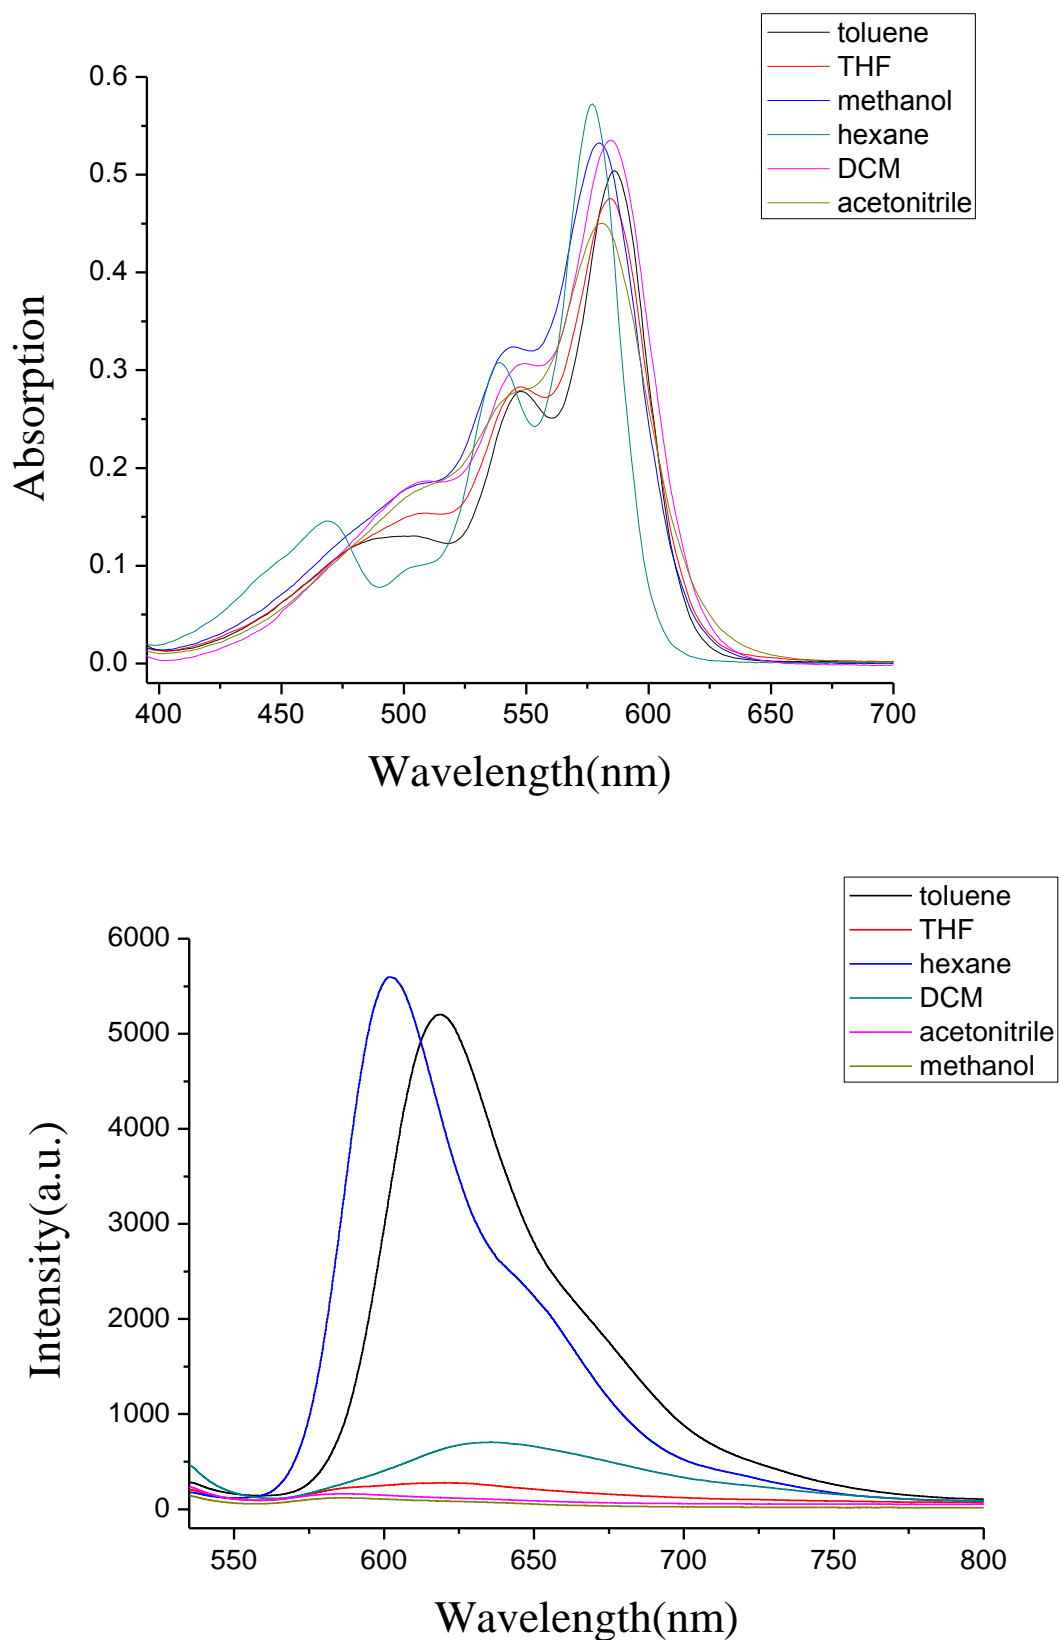

**Figure S25:** Absorption (top) and emission spectra (bottom) of BODIPY **1d** recorded in different solvents. Excited at 520 nm

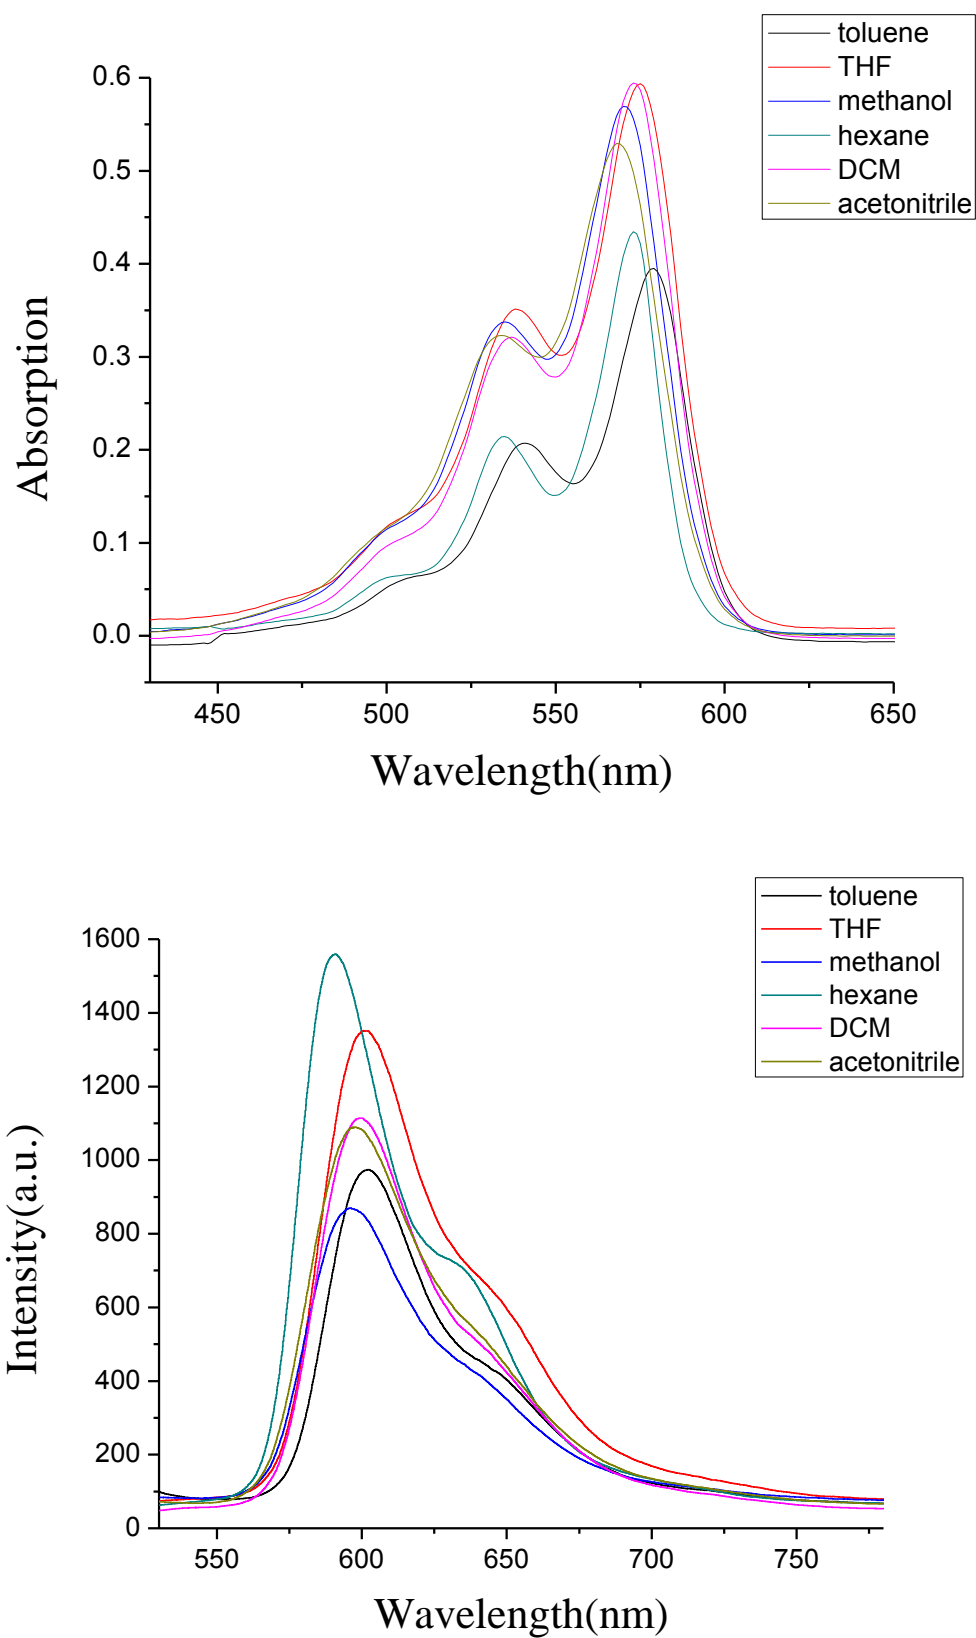

**Figure S26:** Absorption (top) and emission spectra (bottom) of BODIPY **1e** recorded in different solvents. Excited at 520 nm

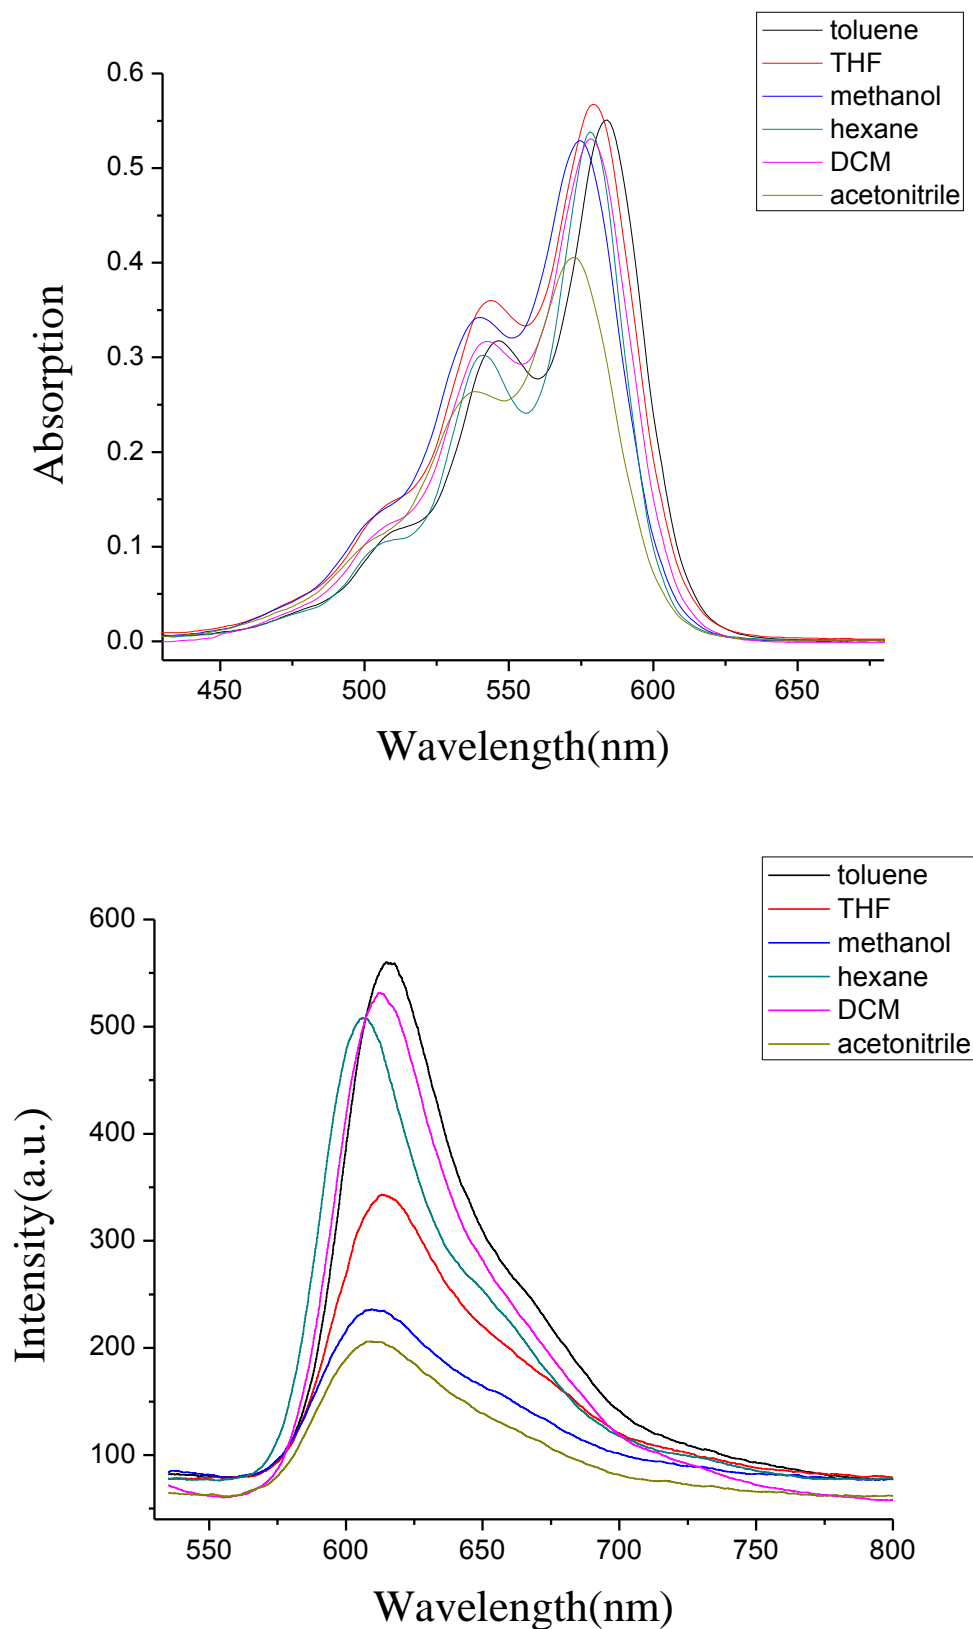

**Figure S27:** Absorption (top) and emission spectra (bottom) of BODIPY **1f** recorded in different solvents. Excited at 520 nm

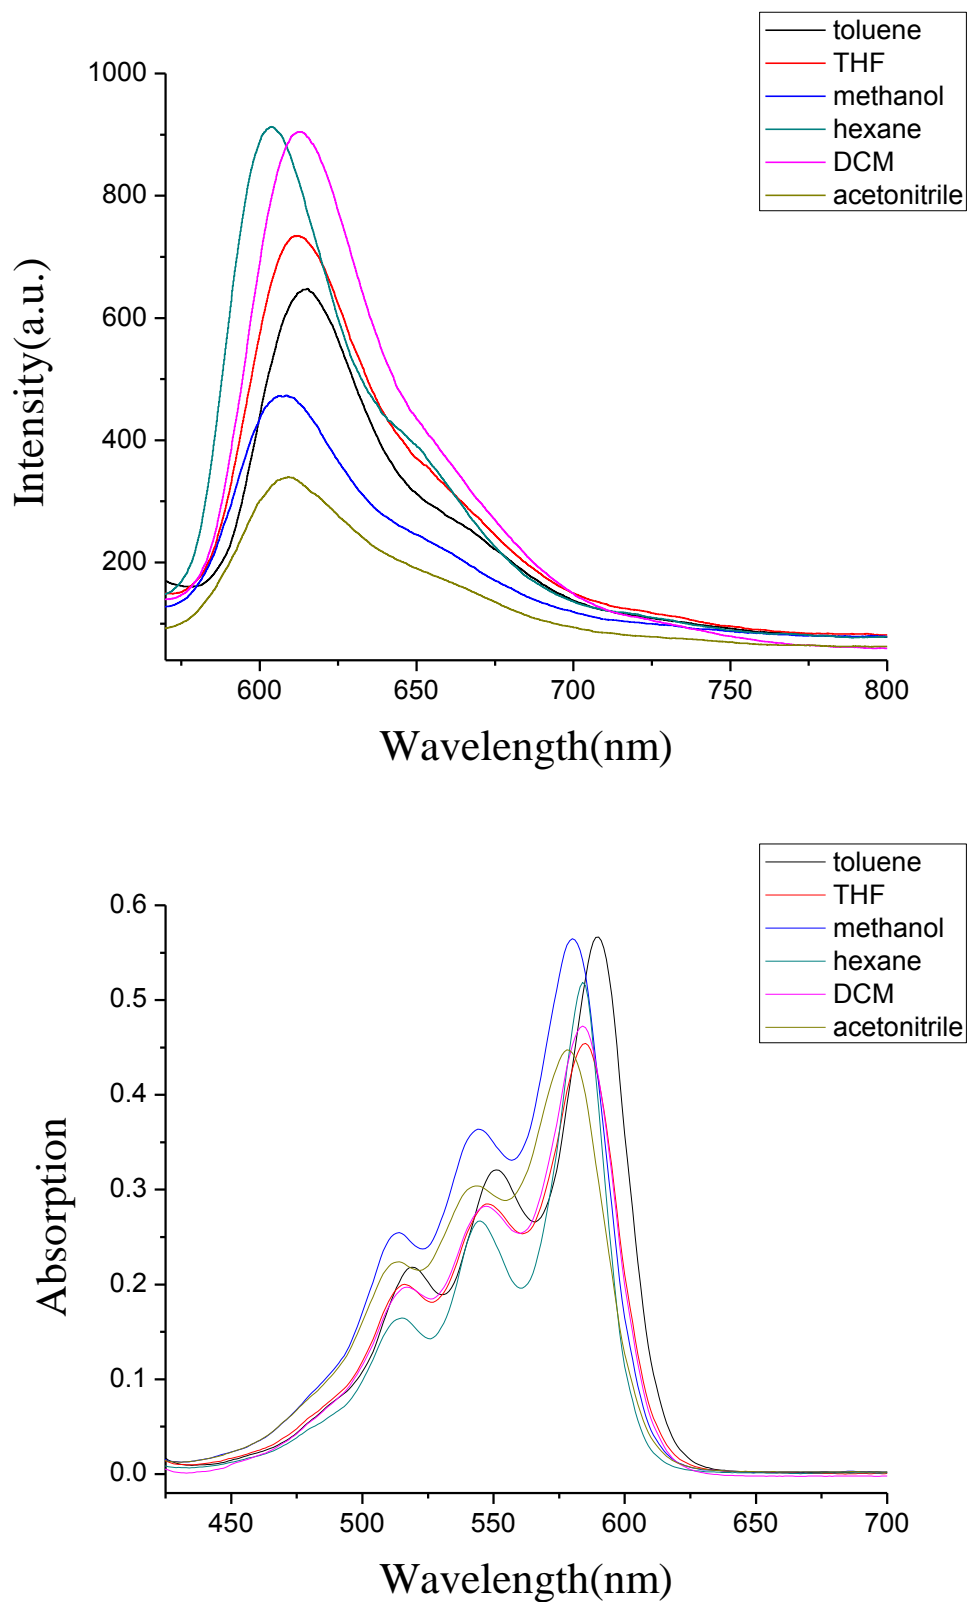

**Figure S28:** Absorption (top) and emission spectra (bottom) of BODIPY **1g** recorded in different solvents. Excited at 520 nm

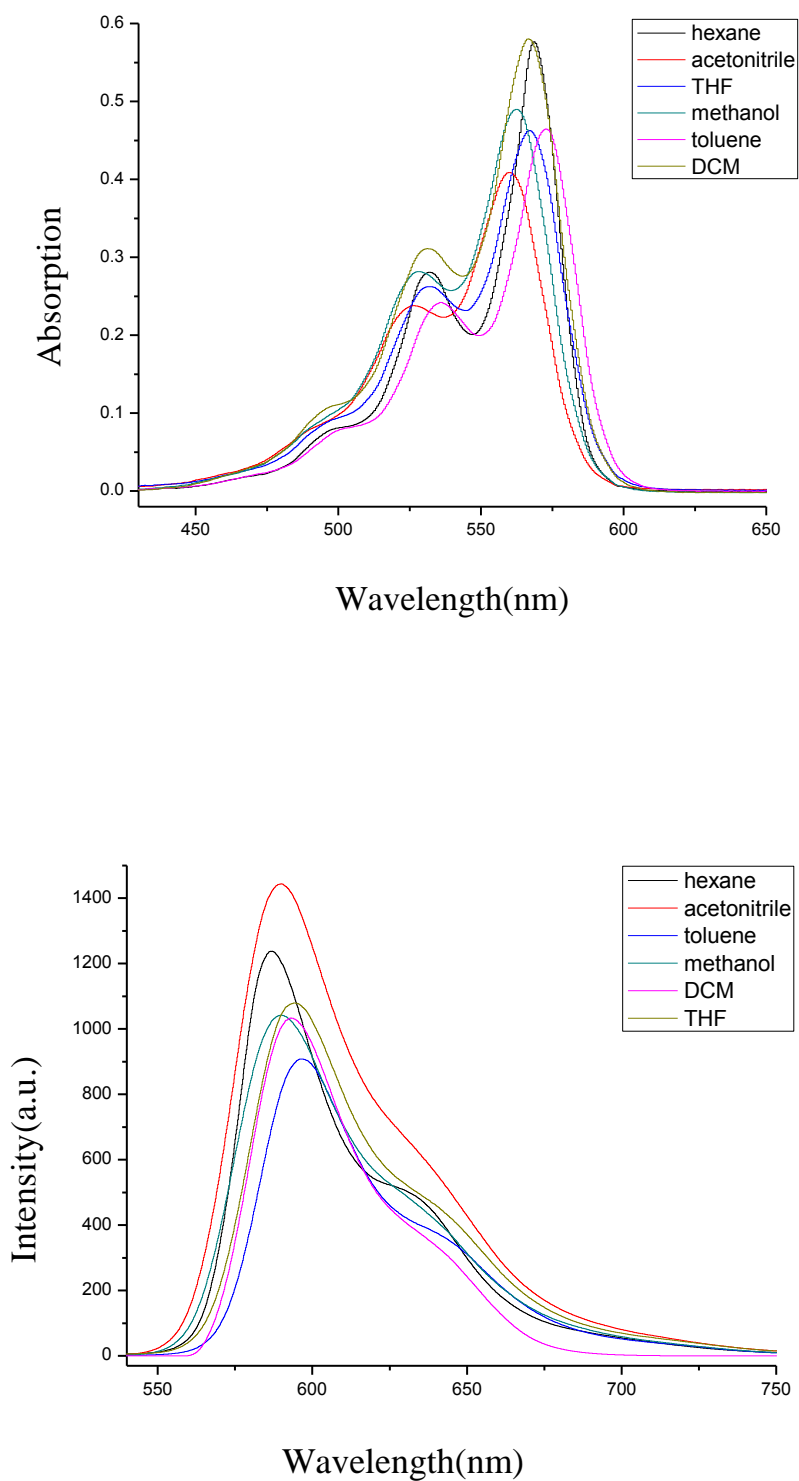

**Figure S29:** Absorption (top) and emission spectra (bottom) of BODIPY **1h** recorded in different solvents. Excited at 520 nm

**5. Table S1.** UV-vis and fluorescence properties of BODIPYs **1a-h** in various solvent at room temperature.

| bodipys                                                                                   | solvent            | $\lambda_{\text{abs}}$<br>(max)/nm | $\lambda_{\text{emiss}}$<br>(max)/nm | $\Phi^a$ | Stokes<br>Shift/ nm | Stokes<br>Shift/cm <sup>-1</sup> |
|-------------------------------------------------------------------------------------------|--------------------|------------------------------------|--------------------------------------|----------|---------------------|----------------------------------|
| 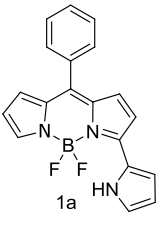<br>1a   | DCM <sup>b</sup>   | 576                                | 609                                  | 0.24     | 33.4                | 952                              |
|                                                                                           | Toluene            | 581                                | 612                                  | 0.29     | 30.4                | 856                              |
|                                                                                           | CH <sub>3</sub> CN | 570                                | 606                                  | 0.16     | 35.6                | 1031                             |
|                                                                                           | MeOH               | 573                                | 604                                  | 0.16     | 31.2                | 901                              |
|                                                                                           | Hexane             | 576                                | 601                                  | 0.26     | 25.0                | 722                              |
|                                                                                           | THF <sup>c</sup>   | 577                                | 609                                  | 0.15     | 32.0                | 911                              |
| <br>1b   | DCM                | 575                                | 607                                  | 0.29     | 31.8                | 911                              |
|                                                                                           | Toluene            | 580                                | 610                                  | 0.36     | 29.8                | 843                              |
|                                                                                           | CH <sub>3</sub> CN | 570                                | 605                                  | 0.23     | 34.8                | 1010                             |
|                                                                                           | MeOH               | 571                                | 604                                  | 0.24     | 32.6                | 946                              |
|                                                                                           | Hexane             | 574                                | 600                                  | 0.31     | 25.2                | 733                              |
|                                                                                           | THF                | 576                                | 610                                  | 0.25     | 33.8                | 962                              |
| <br>1c  | DCM                | 575                                | 606                                  | 0.28     | 31.0                | 890                              |
|                                                                                           | Toluene            | 581                                | 608                                  | 0.40     | 27.2                | 770                              |
|                                                                                           | CH <sub>3</sub> CN | 570                                | 604                                  | 0.18     | 34.2                | 993                              |
|                                                                                           | MeOH               | 572                                | 602                                  | 0.23     | 29.8                | 866                              |
|                                                                                           | Hexane             | 575                                | 597                                  | 0.30     | 22.0                | 641                              |
|                                                                                           | THF                | 577                                | 607                                  | 0.32     | 30.2                | 862                              |
| <br>1d | DCM                | 585                                | 636                                  | 0.05     | 50.8                | 1366                             |
|                                                                                           | Toluene            | 586                                | 618                                  | 0.23     | 32.4                | 894                              |
|                                                                                           | CH <sub>3</sub> CN | 581                                | 622                                  | 0.01     | 40.8                | 1129                             |
|                                                                                           | MeOH               | 580                                | 619                                  | 0.01     | 39.2                | 1092                             |
|                                                                                           | Hexane             | 577                                | 602                                  | 0.26     | 24.8                | 714                              |
|                                                                                           | THF                | 584                                | 620                                  | 0.02     | 36.0                | 994                              |
| <br>1e | DCM                | 573                                | 600                                  | 0.60     | 26.6                | 774                              |
|                                                                                           | Toluene            | 579                                | 602                                  | 0.57     | 23.0                | 660                              |
|                                                                                           | CH <sub>3</sub> CN | 568                                | 598                                  | 0.50     | 30.0                | 883                              |
|                                                                                           | MeOH               | 570                                | 596                                  | 0.56     | 26.0                | 765                              |
|                                                                                           | Hexane             | 573                                | 598                                  | 0.50     | 25.0                | 730                              |
|                                                                                           | THF                | 575                                | 601                                  | 0.57     | 26.2                | 758                              |



|                                                                                          |                    |     |     |      |      |      |
|------------------------------------------------------------------------------------------|--------------------|-----|-----|------|------|------|
| 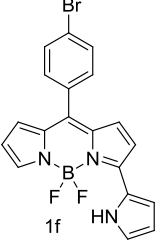<br>1f  | DCM                | 578 | 612 | 0.27 | 34.2 | 967  |
|                                                                                          | Toluene            | 584 | 615 | 0.36 | 30.8 | 858  |
|                                                                                          | CH <sub>3</sub> CN | 572 | 609 | 0.21 | 36.8 | 1057 |
|                                                                                          | MeOH               | 575 | 609 | 0.20 | 34.4 | 982  |
|                                                                                          | Hexane             | 578 | 606 | 0.28 | 28.0 | 799  |
|                                                                                          | THF                | 579 | 613 | 0.28 | 34.0 | 958  |
| <br>1g  | DCM                | 584 | 612 | 0.56 | 28.2 | 789  |
|                                                                                          | Toluene            | 590 | 615 | 0.57 | 25.2 | 694  |
|                                                                                          | CH <sub>3</sub> CN | 578 | 609 | 0.35 | 31.0 | 881  |
|                                                                                          | MeOH               | 580 | 608 | 0.33 | 28.2 | 799  |
|                                                                                          | Hexane             | 584 | 604 | 0.68 | 19.6 | 556  |
|                                                                                          | THF                | 585 | 612 | 0.55 | 17.2 | 480  |
| <br>1h | DCM                | 567 | 593 | 0.34 | 26.0 | 773  |
|                                                                                          | Toluene            | 573 | 597 | 0.45 | 23.4 | 685  |
|                                                                                          | CH <sub>3</sub> CN | 560 | 582 | 0.34 | 21.8 | 669  |
|                                                                                          | MeOH               | 563 | 590 | 0.45 | 27.0 | 813  |
|                                                                                          | Hexane             | 569 | 587 | 0.47 | 17.4 | 522  |
|                                                                                          | THF                | 568 | 594 | 0.35 | 26.5 | 786  |

<sup>a</sup>the fluorescence quantum yields were calculated using Rhodamine B (0.49 in ethanol) as the reference. <sup>b</sup>Dichloromethane. <sup>c</sup>tetrahydrofuran.

## 6. Experimental Fluorescence Decay Curve

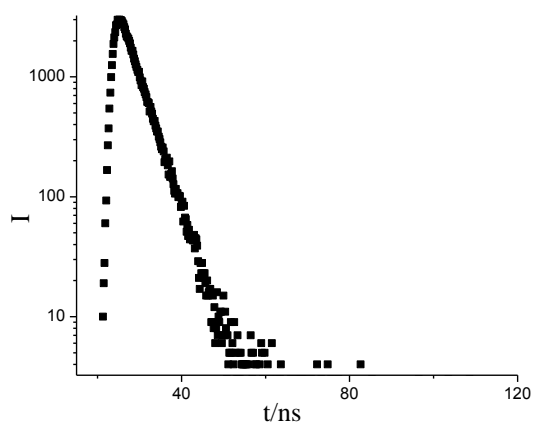

**Figure S30:** Experimental fluorescence decay Curve of BODIPYs **1a** in nondegassed DCM.

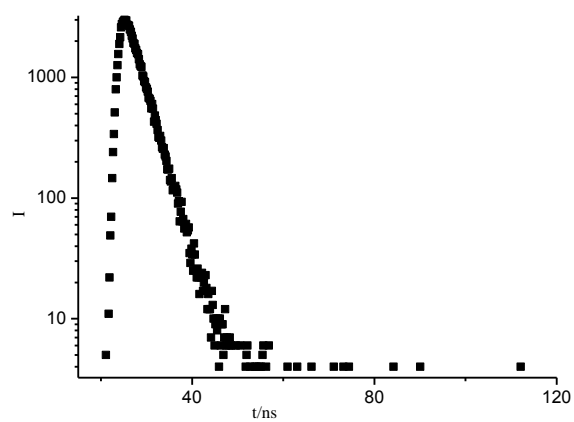

**Figure S31:** Experimental fluorescence decay Curve of BODIPYs **1b** in nondegassed DCM.

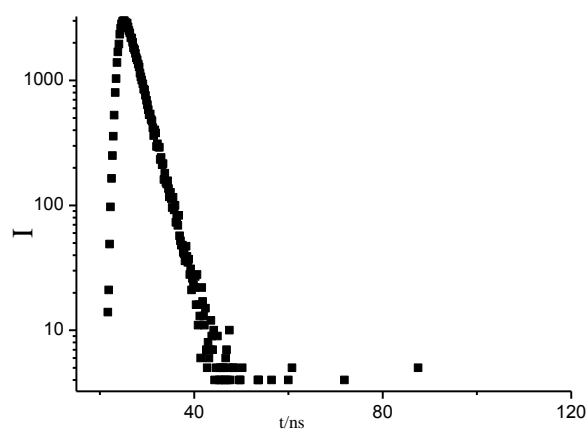

**Figure S32:** Experimental fluorescence decay Curve of BODIPYs **1c** in nondegassed DCM.

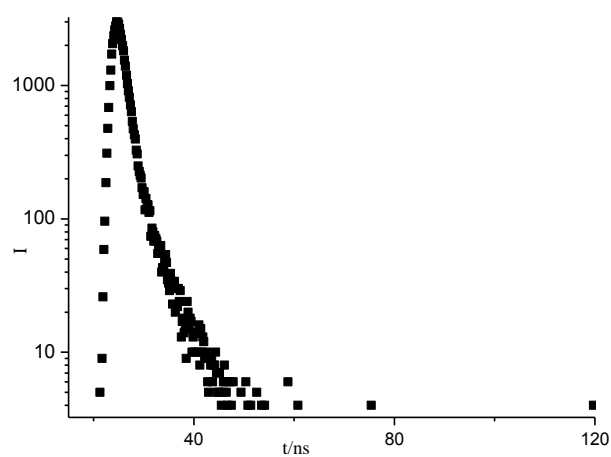

**Figure S33:** Experimental fluorescence decay Curve of BODIPYs **1d** in nondegassed DCM.

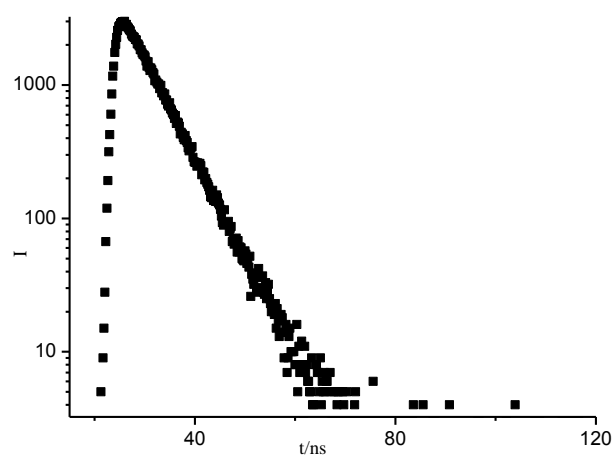

**Figure S34:** Experimental fluorescence decay Curve of BODIPYs **1e** in nondegassed DCM.

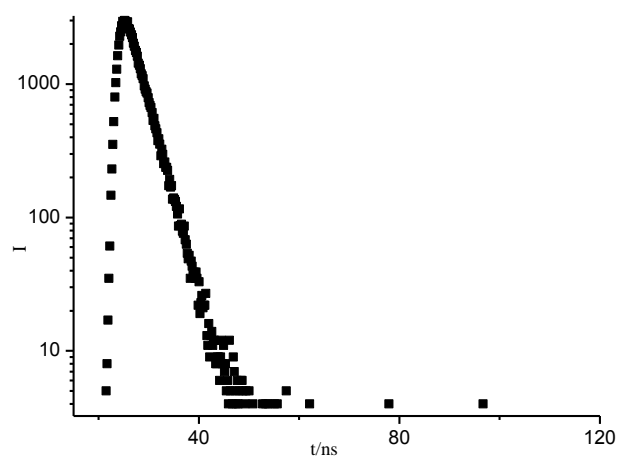

**Figure S35:** Experimental fluorescence decay Curve of BODIPYs **1f** in nondegassed DCM.

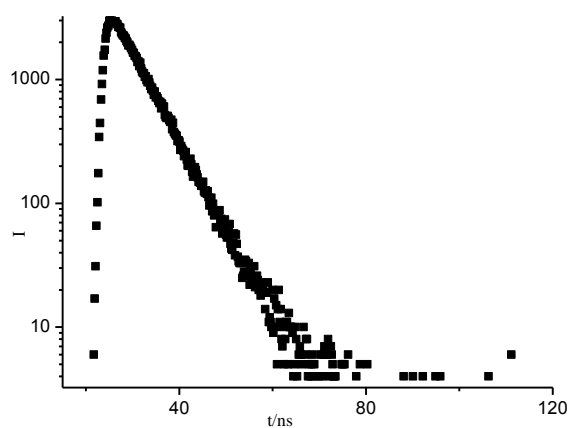

**Figure S36:** Experimental fluorescence decay Curve of BODIPYs **1g** in nondegassed DCM.

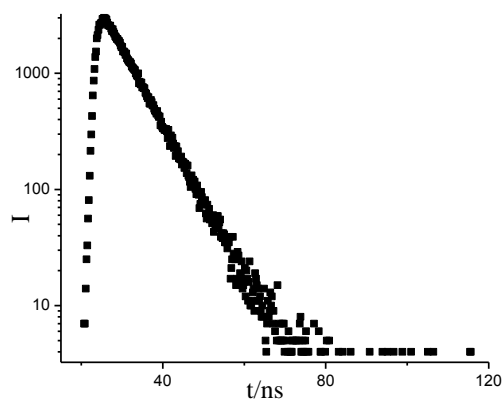

**Figure S37:** Experimental fluorescence decay Curve of BODIPYs **1h** in nondegassed DCM.
